# Supplementary material for: Synthesis and biological evaluation of N-alkyl sulfonamides derived from polycyclic hydrocarbon scaffolds using a nitrogen-centered radical approach
Source: Royal Society of Chemistry journal article supplement (doi:10.1039/d2ob01291j), 2022-01-01
Supplement: d2ob01291j1.pdf [file d2ob01291j1.pdf]

## Experimental Supporting Information

Synthesis and Biological Evaluation of N-Alkyl Sulfonamides Derived from Polycyclic Hydrocarbon Scaffolds Using a Nitrogen-Centered Radical Approach

Megan D. Hopkins, Ryan C. Witt, Ann Marie E. Flusche, John E. Philo, Garrett L. Ozmer, Gordon H. Purser, Robert J. Sheaff\*, and Angus A. Lamar\*

Department of Chemistry and Biochemistry, The University of Tulsa, 800 S. Tucker Dr., Tulsa, OK 74104, USA.

[robert-sheaff@utulsa.edu](mailto:robert-sheaff@utulsa.edu)

[angus-lamar@utulsa.edu](mailto:angus-lamar@utulsa.edu)

### Index

|                                                                                                 |     |
|-------------------------------------------------------------------------------------------------|-----|
| Construction of white LED chamber                                                               | S-1 |
| <b>Figure S1</b> - Luciferase control experiments                                               | S-2 |
| <b>Table S1</b> - CellTiter-Glo assays of <b>2-18</b>                                           | S-2 |
| <b>Figure S2</b> – Calibration curve for LogP determination                                     | S-3 |
| <sup>1</sup> H and <sup>13</sup> C NMR Spectra of Products <b>2-23</b> (Figures S3 through S46) | S-4 |

### Construction of LED Chambers:

Visible-light photocatalytic reactions were set up in a light bath which was constructed in our laboratory by coiling LED strips around an evaporating dish according to our previous reports:<sup>1-4</sup>

Waterproof 5050 LED strips (12V with power adapter, 18 LEDs/foot, approximately 0.24 Watt per LED – 72 Watt per strip) are coiled around the interior of evaporating dish (170mm x 90mm) using the adhesive backing of the LED strip. A Petri dish (150 x 20 mm) is placed upside down at the bottom of the dish to serve as an elevated glass “floor” to ensure that a round-bottom flask receives maximum light exposure. The ambient temperature inside the dish is monitored and is generally maintained (air-cooled or fan) between 19-22 °C (the temperature has not been observed above 25 °C).

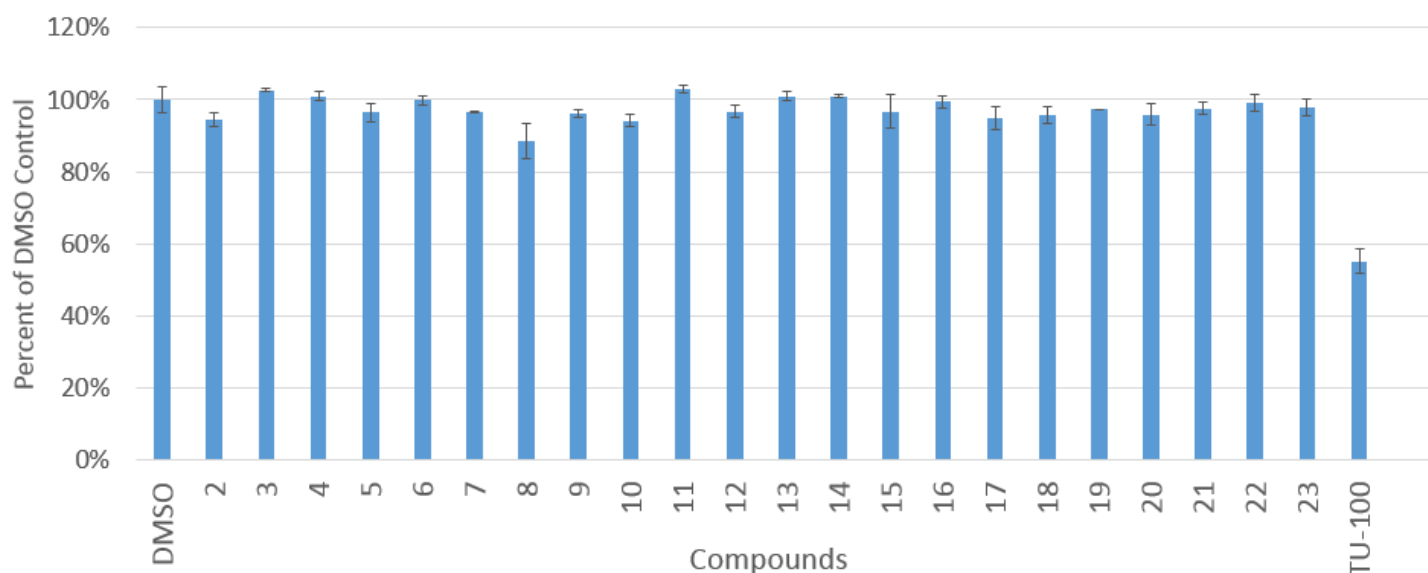

**Figure S1** - Control experiments performed at 5 h exposure of 50  $\mu$ M of compounds using CellTiter-Glo assay with exogenous ATP added. No inhibition of the luciferase-producing assay itself was observed by the compounds (**2-23**). TU-100,<sup>5</sup> a known inhibitor of the luciferase assay, was used as a positive control.

| Compounds   | Cell Lines (Values are shown as Percent of DMSO Control) |                    |                     |                    |                    |
|-------------|----------------------------------------------------------|--------------------|---------------------|--------------------|--------------------|
|             | HDF                                                      | H293               | HeLa                | PC3                | BxPC3              |
| <b>DMSO</b> | 100 ± 3.4%                                               | 100.0 ± 4.7%       | 100.0 ± 10.8%       | 100.0 ± 1.0%       | 100.0 ± 8.2%       |
| <b>2</b>    | 54.3 ± 2.2%                                              | 80.9 ± 2.8%        | 57.6 ± 21.1%        | 55.3 ± 1.3%        | 55.5 ± 3.1%        |
| <b>3</b>    | <b>10.1 ± 0.1%</b>                                       | 67.9 ± 0.2%        | <b>27.0 ± 2.4%</b>  | <b>46.4 ± 1.7%</b> | <b>38.0 ± 1.8%</b> |
| <b>4</b>    | 97.7 ± 0.3%                                              | 86.0 ± 3.9%        | 92.8 ± 4.6%         | 73.9 ± 7.3%        | 90.5 ± 0.7%        |
| <b>5</b>    | <b>20.8 ± 1.7%</b>                                       | 76.0 ± 1.5%        | <b>40.5 ± 0.4%</b>  | <b>43.9 ± 9.0%</b> | 52.3 ± 0.2%        |
| <b>6</b>    | <b>39.8 ± 3.9%</b>                                       | 63.6 ± 3.0%        | 54.9 ± 2.7%         | <b>41.7 ± 0.7%</b> | <b>46.5 ± 4.1%</b> |
| <b>7</b>    | 67.8 ± 11.7%                                             | 94.0 ± 1.8%        | 79.9 ± 0.0%         | 67.5 ± 4.2%        | 68.7 ± 1.3%        |
| <b>8</b>    | <b>25.6 ± 12.8%</b>                                      | 61.1 ± 0.6%        | <b>46.8 ± 9.3%</b>  | 74.9 ± 8.4%        | 56.7 ± 8.7%        |
| <b>9</b>    | <b>1.1 ± 0.1%</b>                                        | <b>41.0 ± 4.9%</b> | <b>4.6 ± 0.6%</b>   | <b>17.5 ± 7.8%</b> | <b>1.9 ± 1.2%</b>  |
| <b>10</b>   | <b>20.6 ± 1.1%</b>                                       | 80.0 ± 4.4%        | <b>40.4 ± 10.8%</b> | <b>37.1 ± 2.4%</b> | 50.8 ± 0.4%        |
| <b>11</b>   | 77.0 ± 1.6%                                              | 68.1 ± 1.3%        | 71.1 ± 9.7%         | 53.9 ± 3.3%        | 75.5 ± 2.2%        |
| <b>12</b>   | 61.0 ± 11.1%                                             | 82.3 ± 11.6%       | 59.2 ± 3.2%         | 63.2 ± 5.0%        | 69.5 ± 3.9%        |
| <b>13</b>   | 107.3 ± 1.1%                                             | 77.4 ± 2.4%        | 81.9 ± 4.8%         | 76.8 ± 4.9%        | 80.8 ± 2.9%        |
| <b>14</b>   | 86.6 ± 2.4%                                              | 76.0 ± 6.8%        | 81.8 ± 4.7%         | <b>47.3 ± 8.3%</b> | 76.7 ± 6.7%        |
| <b>15</b>   | <b>13.4 ± 0.5%</b>                                       | <b>46.7 ± 7.0%</b> | <b>22.1 ± 3.0%</b>  | <b>44.5 ± 6.1%</b> | <b>42.5 ± 0.5%</b> |
| <b>16</b>   | <b>19.2 ± 0.5%</b>                                       | 51.9 ± 1.9%        | <b>15.8 ± 0.6%</b>  | <b>9.9 ± 0.5%</b>  | <b>7.9 ± 0.2%</b>  |
| <b>17</b>   | <b>1.2 ± 0.1%</b>                                        | <b>7.8 ± 4.4%</b>  | <b>1.5 ± 0.3%</b>   | <b>5.6 ± 1.6%</b>  | <b>1.0 ± 0.3%</b>  |
| <b>18</b>   | 58.3 ± 1.6%                                              | 67.0 ± 2.3%        | 79.5 ± 14.2%        | 50.1 ± 1.3%        | <b>48.4 ± 2.0%</b> |

**Table S1.** Cell viability results from screening of compounds **2-18** (50  $\mu$ M), 24 h incubation, CellTiter-Glo assay (Promega). Compound “hits” (<50% percent of DMSO control) are shown in red.

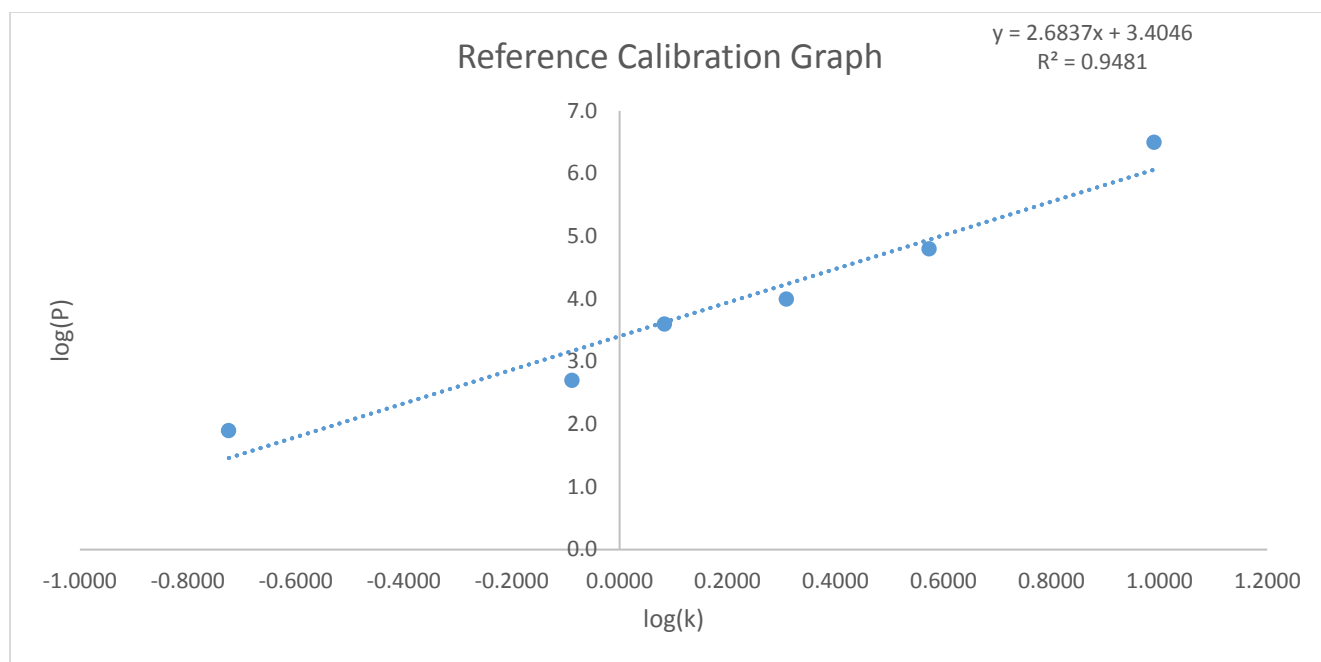

| Compound     | $T_r$  | $T_o$ (ethyl acetate) | k      | Log(k)  | Log(P) |
|--------------|--------|-----------------------|--------|---------|--------|
| Nitrobenzene | 4.528  | 3.809                 | 0.1888 | -0.7240 | 1.9    |
| Toluene      | 6.93   | 3.814                 | 0.8170 | -0.0878 | 2.7    |
| Naphthalene  | 8.466  | 3.827                 | 1.2122 | 0.0836  | 3.6    |
| Biphenyl     | 11.637 | 3.83                  | 2.0384 | 0.3093  | 4.0    |
| Bibenzyl     | 18.179 | 3.831                 | 3.7452 | 0.5735  | 4.8    |
| DDT          | 41.243 | 3.827                 | 9.7768 | 0.9902  | 6.5    |

**Figure S2.** Calibration curve and raw data for calculation of LogP values of known calibration compounds. This data was obtained by our research group and reported previously.<sup>6</sup>

## Product Characterization:

All products were isolated according to general procedure unless otherwise noted and display the characterizational data shown below.

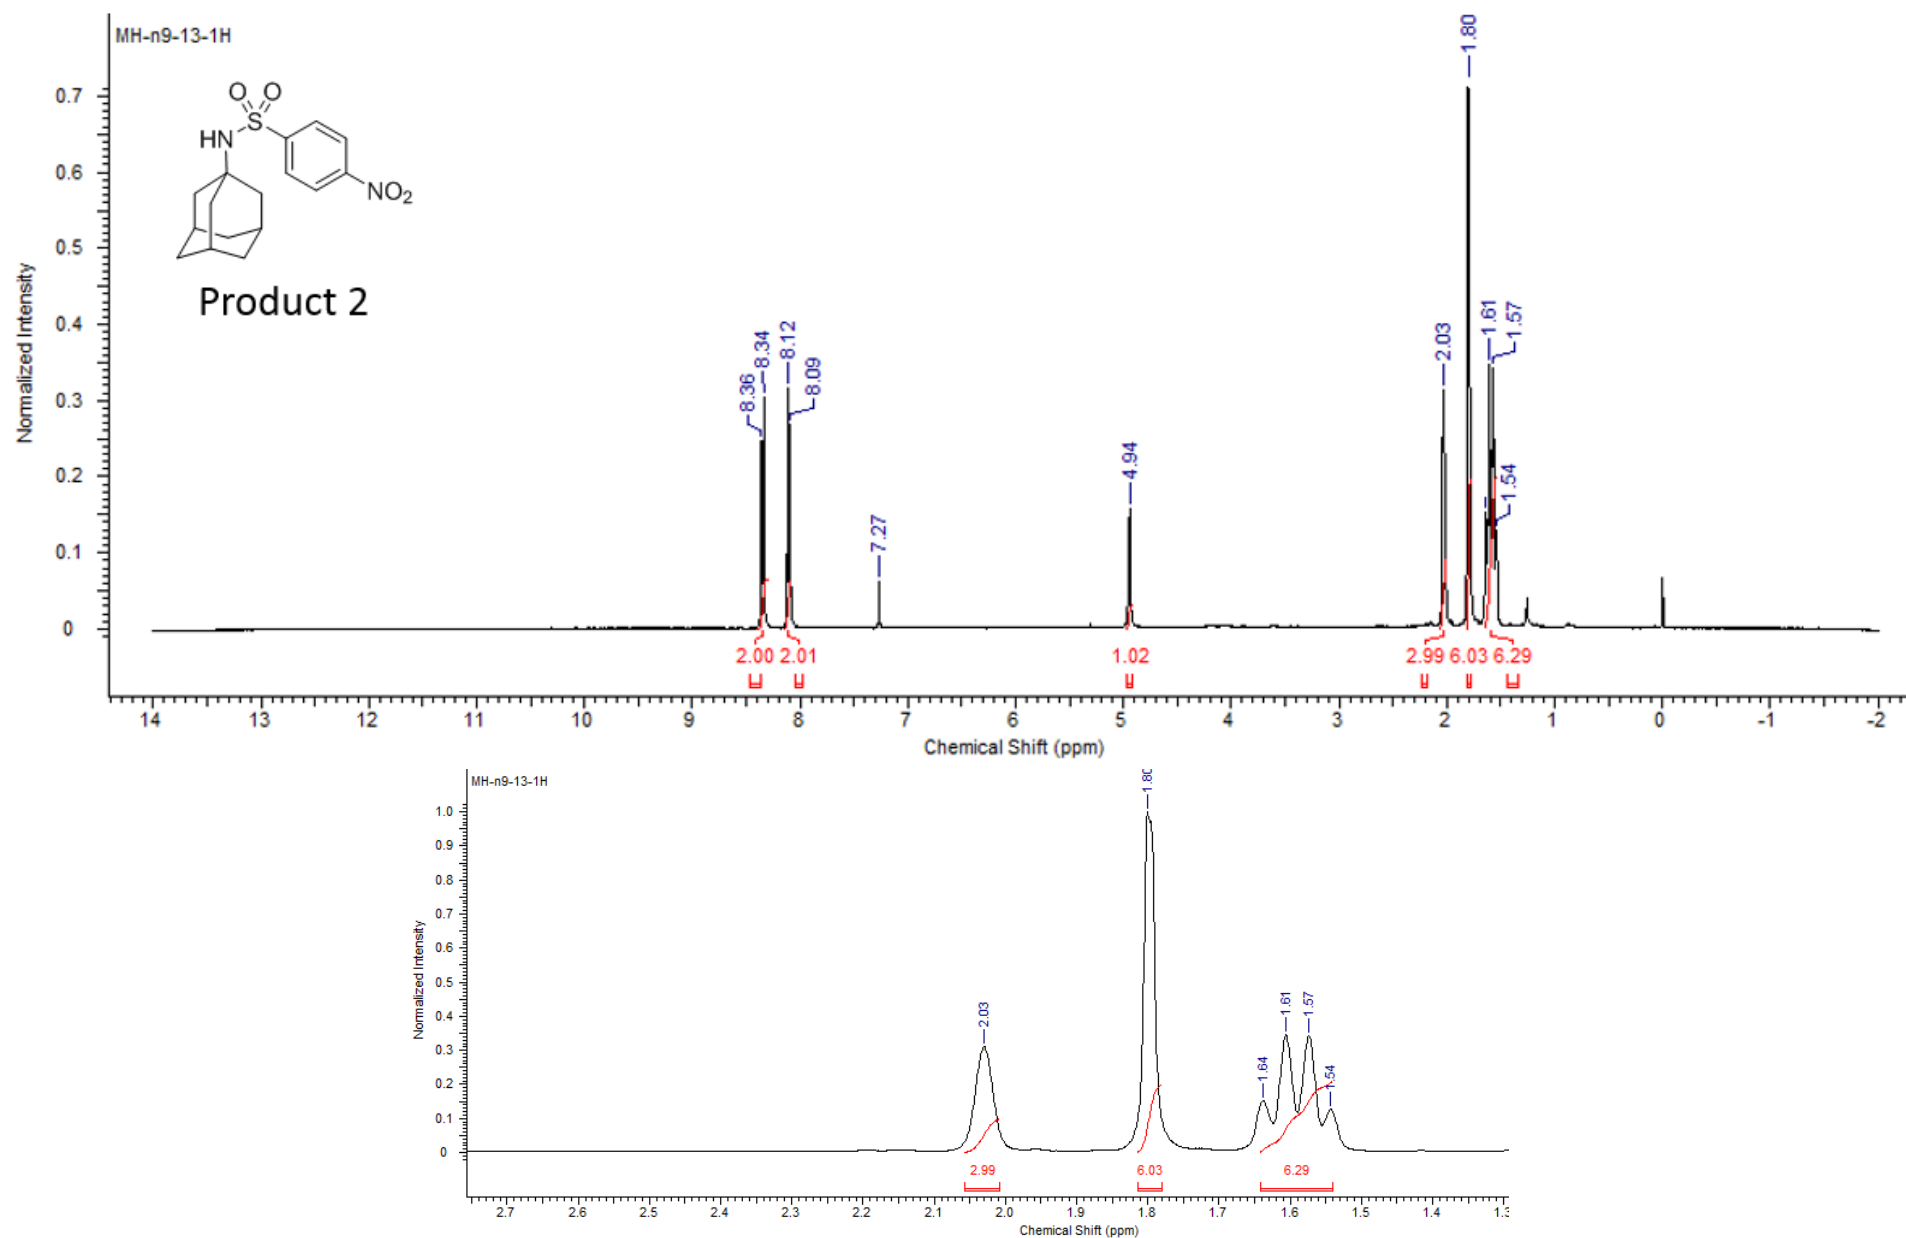

Figure S3. <sup>1</sup>H NMR of Product 2.

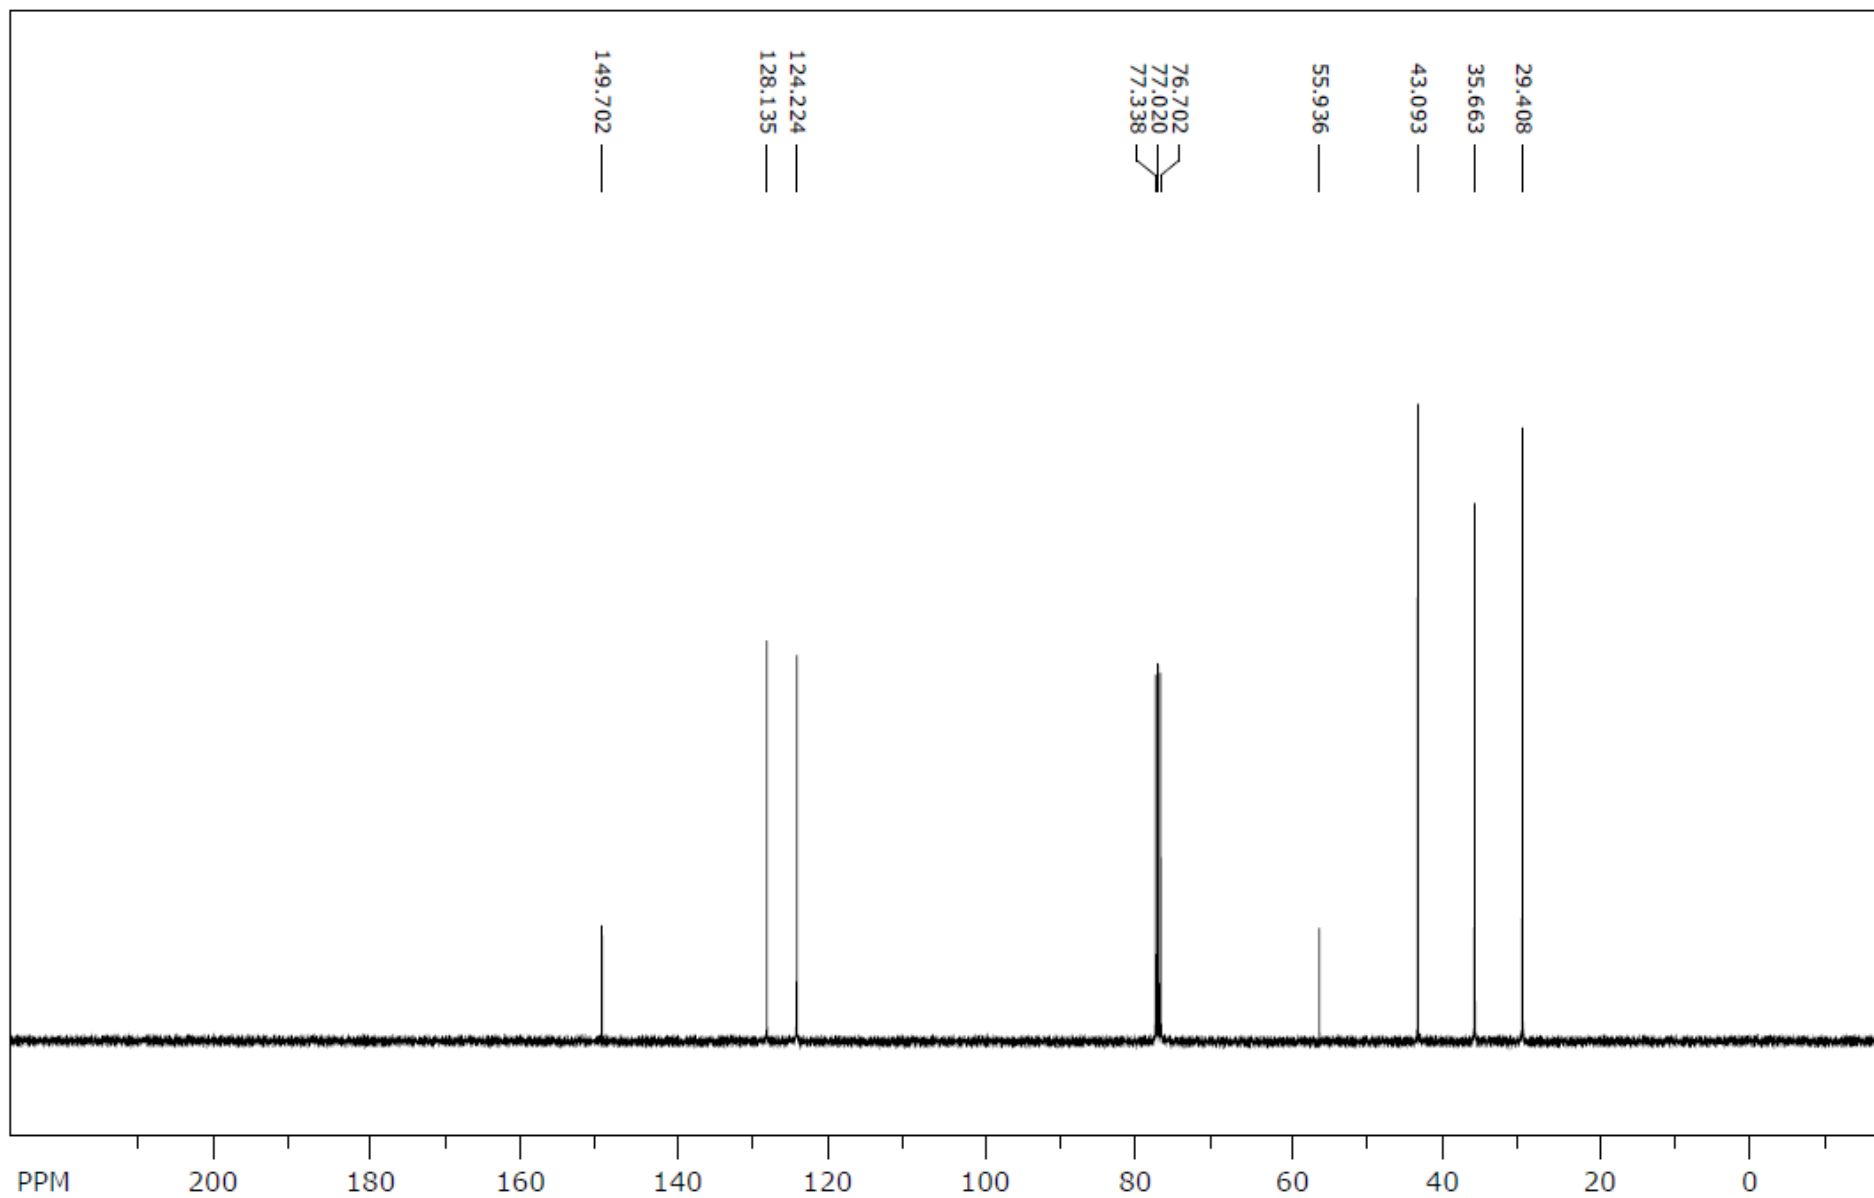

file: ...tane, 4-NO<sub>2</sub>Ph\MH-n9-13-13C.fid\fid block# 1 expt: "s2pul"  
transmitter freq.: 100.511715 MHz  
time domain size: 63750 points  
width: 24509.80 Hz = 243.8502 ppm = 0.384468 Hz/pt  
number of scans: 1488

freq. of 0 ppm: 100.501162 MHz  
processed size: 65536 complex points  
LB: 0.500 GF: 0.0000  
Hz/cm: 980.392 ppm/cm: 9.75401

**Figure S4.** <sup>13</sup>C NMR of Product 2.

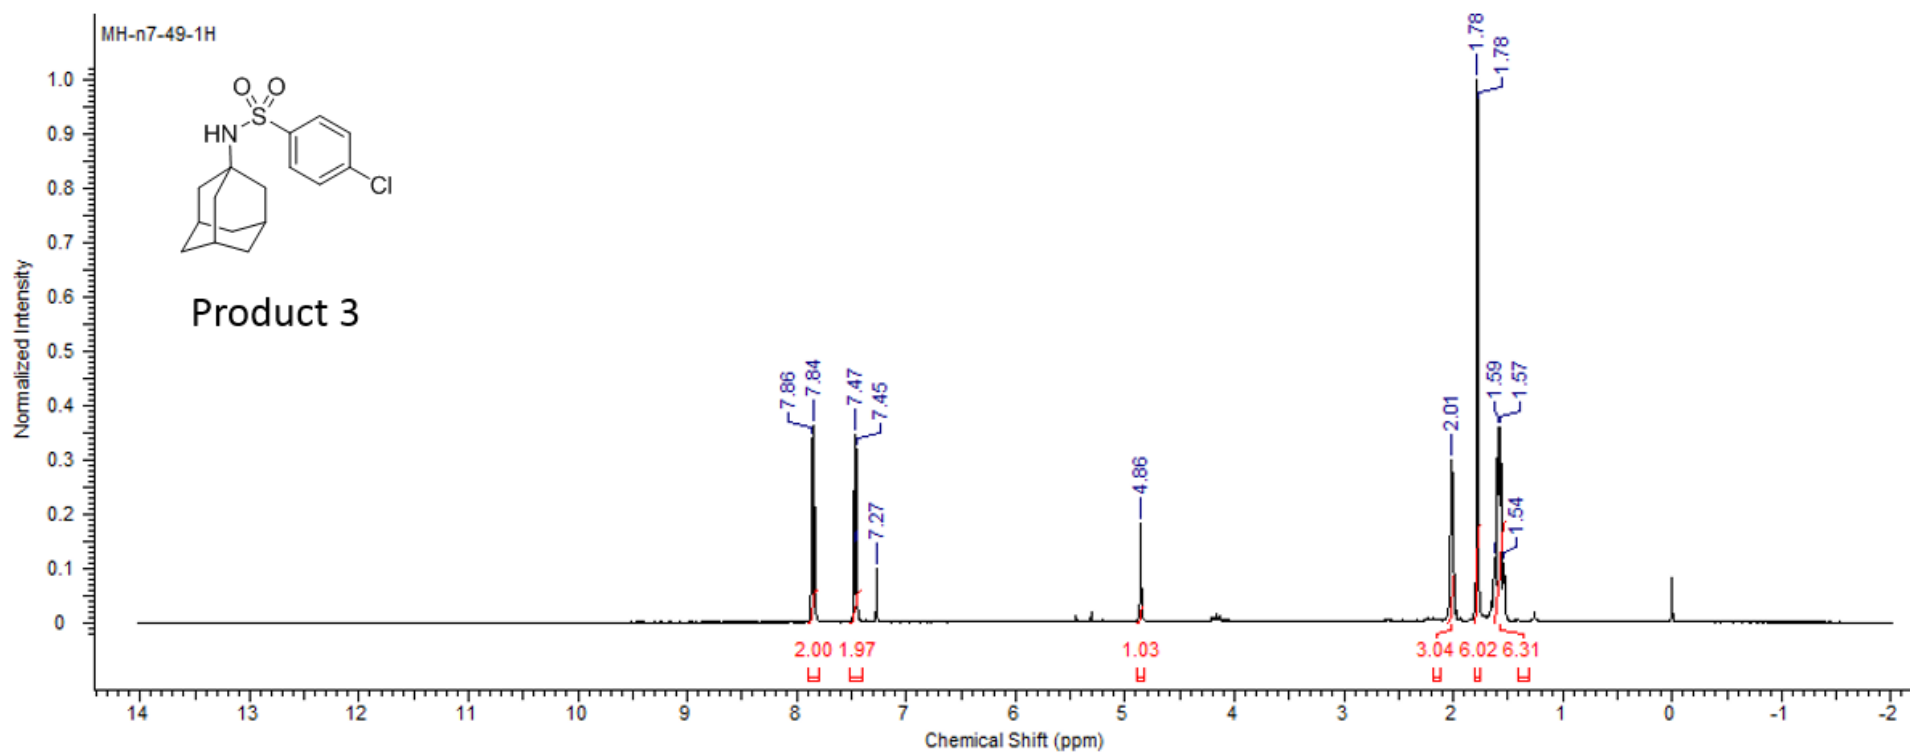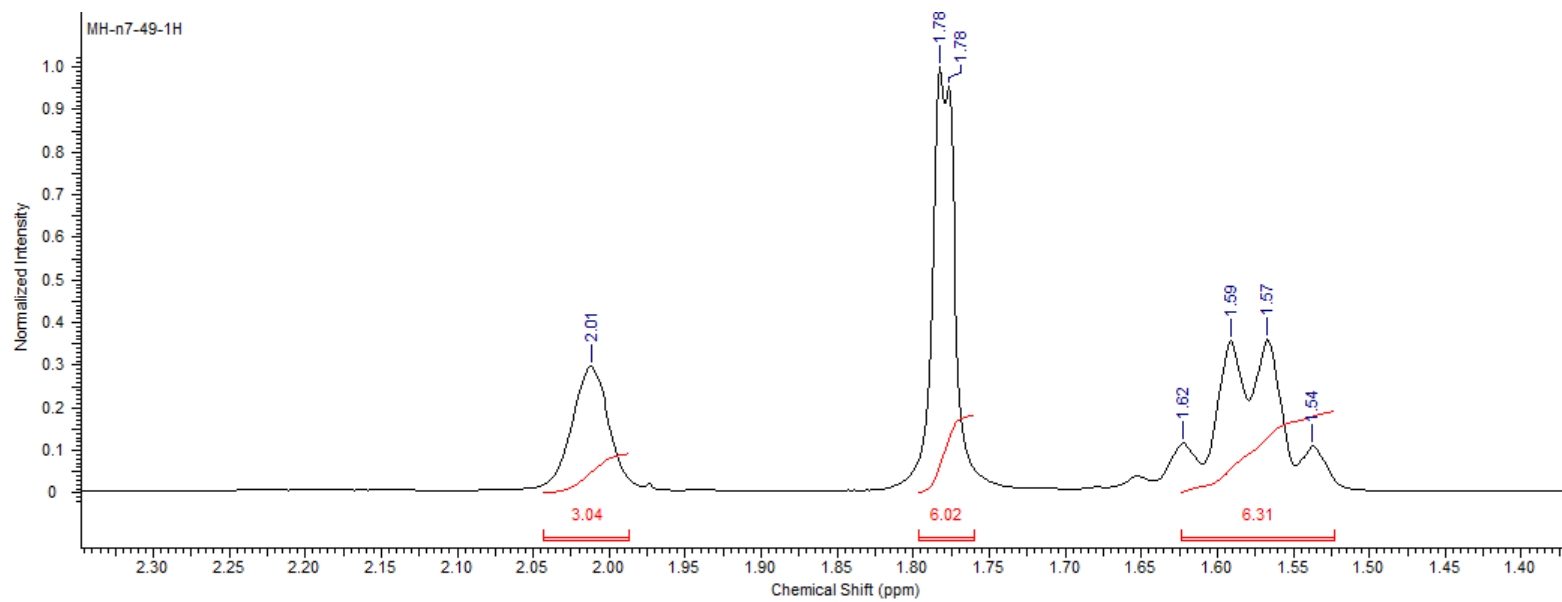

Figure S5.  $^1\text{H}$  NMR of Product 3.

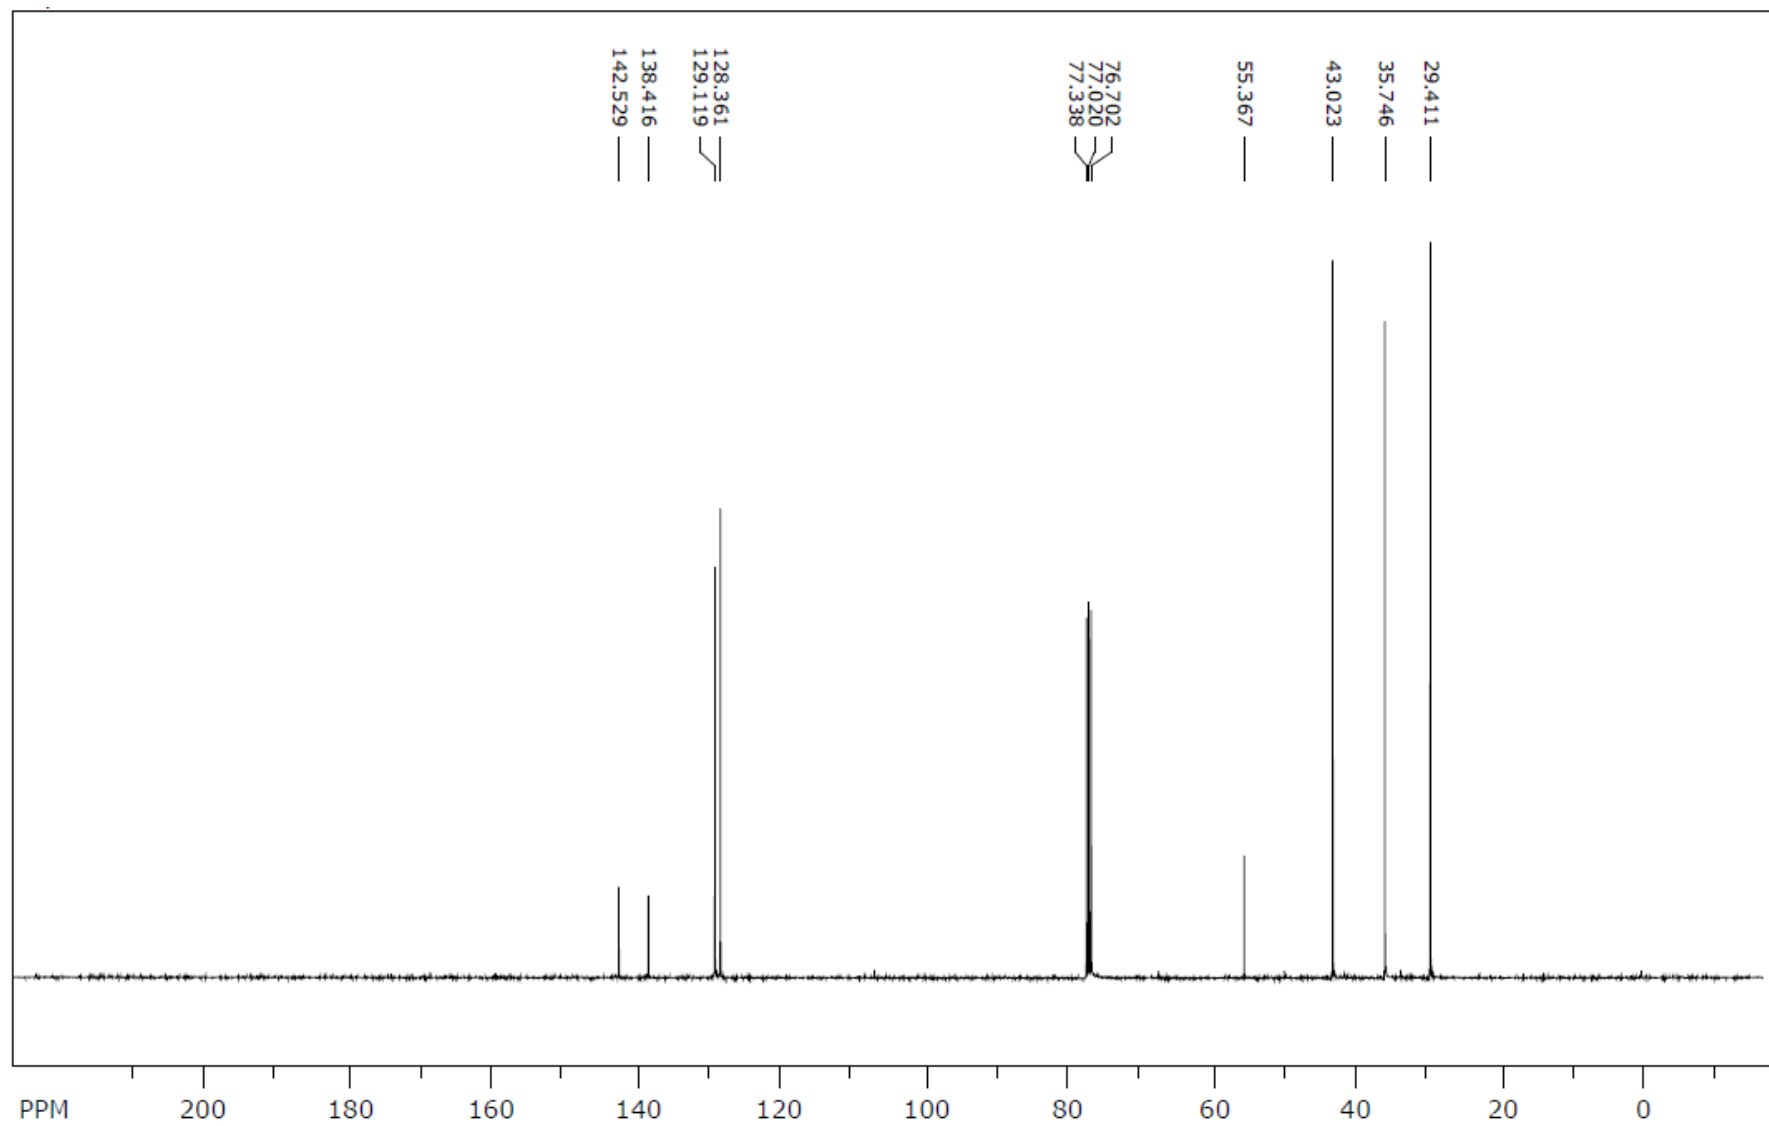

file: ...ntane, 4-ClPh\MH-n7-49-13C.fid\fid\_block# 1 expt: "s2pul"  
transmitter freq.: 100.511715 MHz  
time domain size: 63750 points  
width: 24509.80 Hz = 243.8502 ppm = 0.384468 Hz/pt  
number of scans: 17000

freq. of 0 ppm: 100.501162 MHz  
processed size: 65536 complex points  
LB: 0.500 GF: 0.0000  
Hz/cm: 980.392 ppm/cm: 9.75401

Figure S6. <sup>13</sup>C NMR of Product 3.

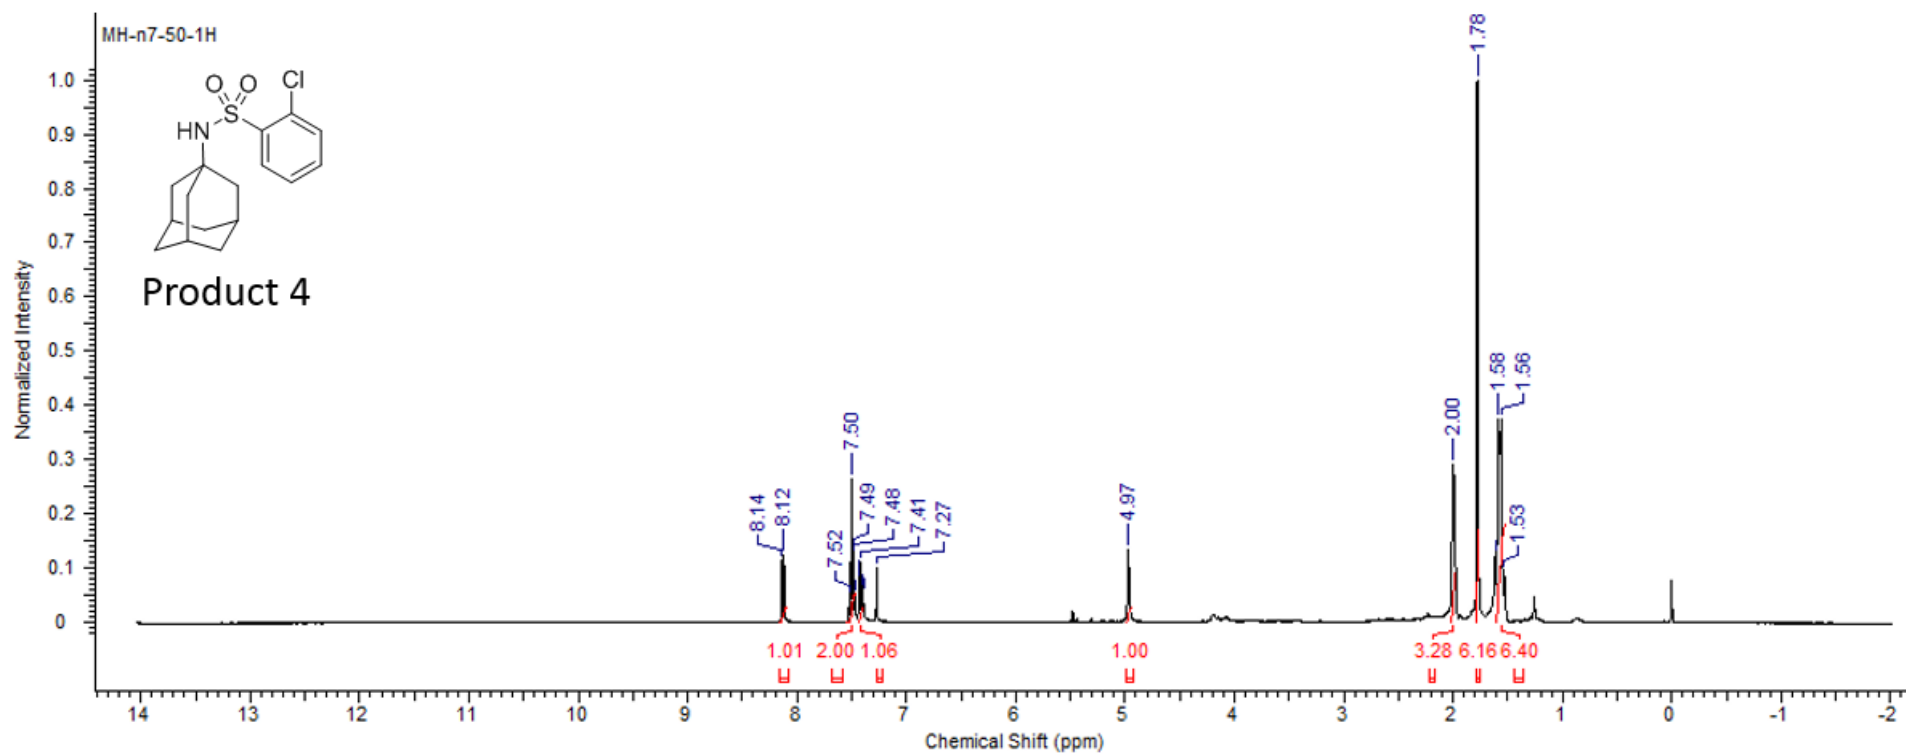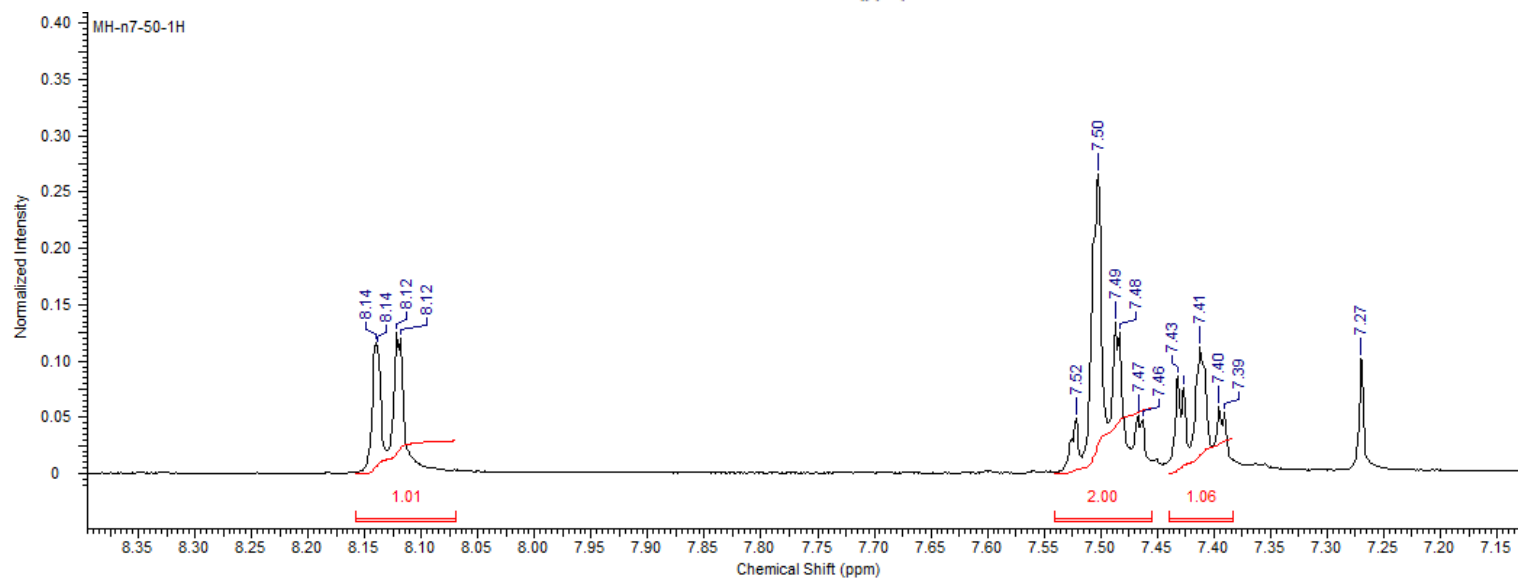

Figure S7.  $^1\text{H}$  NMR of Product 4.



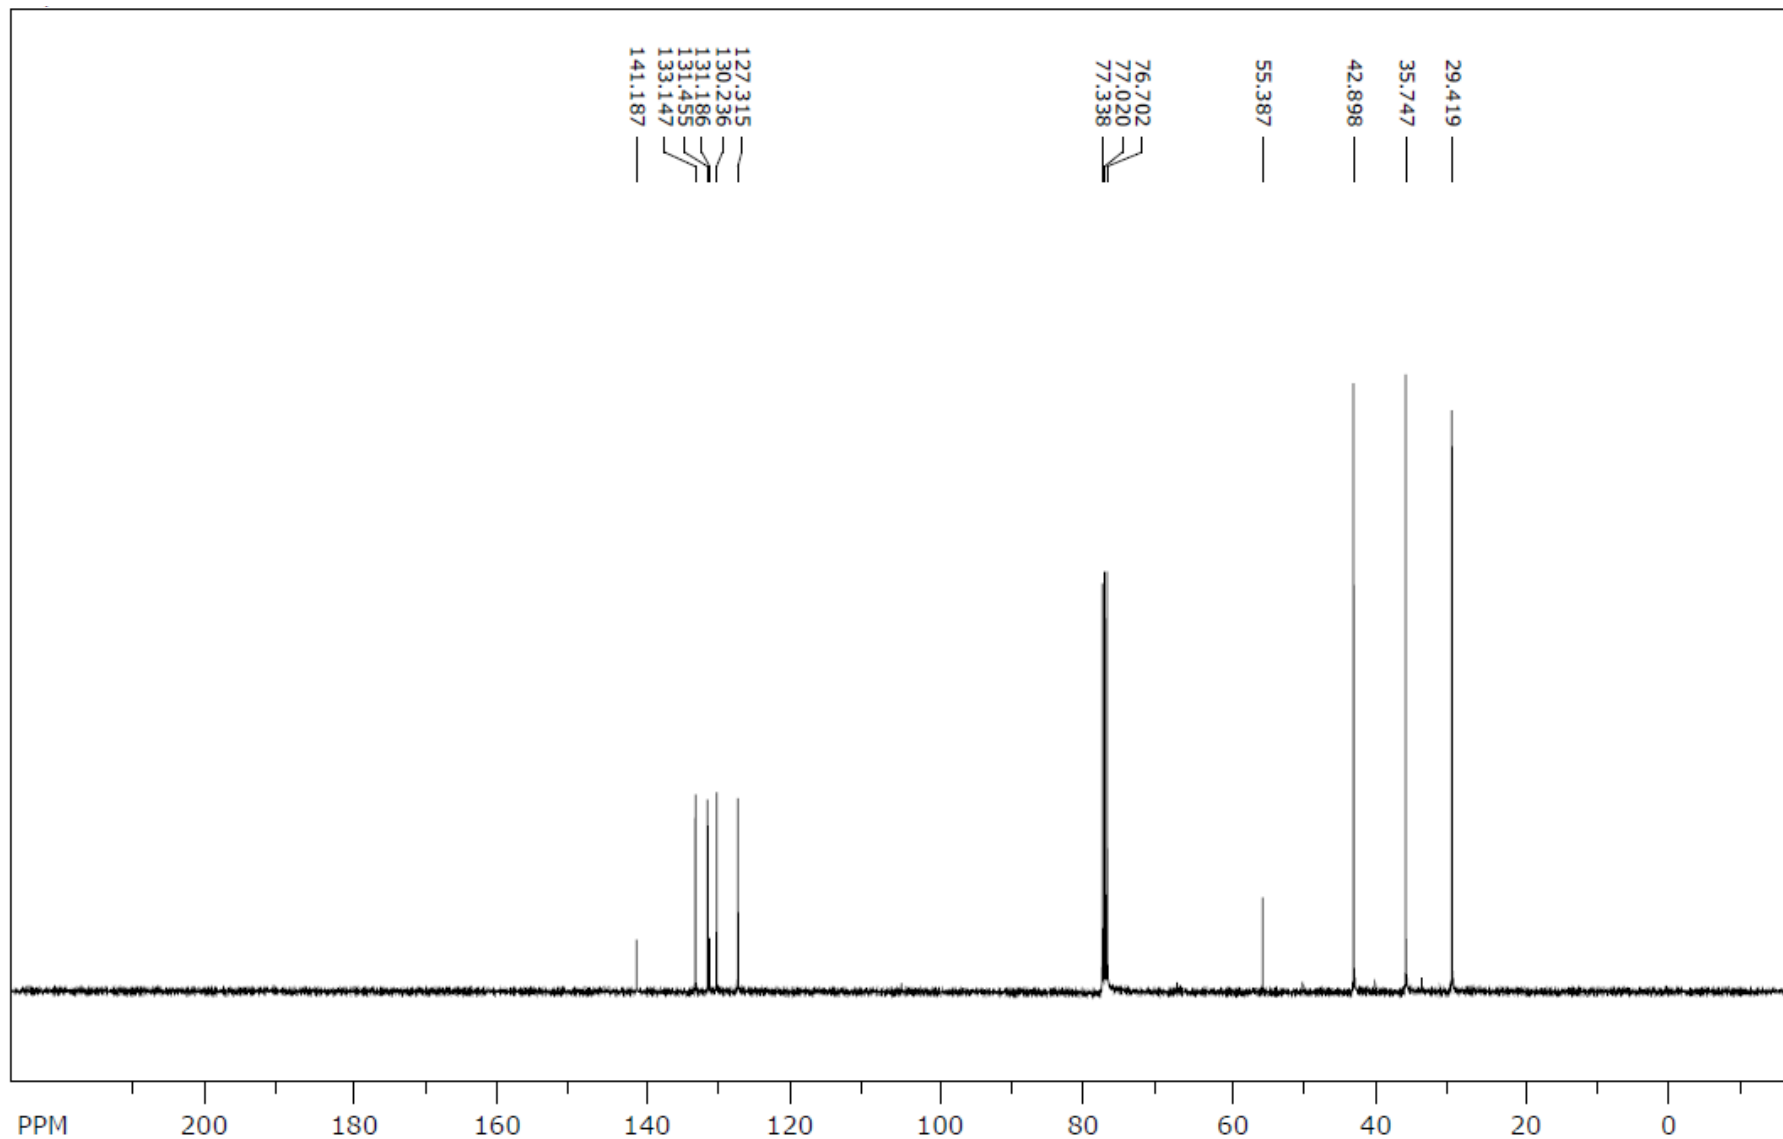

file: ...ntane, 2-ClPh\MH-n7-50-13C.fid\fid block# 1 expt: "s2pul"  
 transmitter freq.: 100.511715 MHz  
 time domain size: 63750 points  
 width: 24509.80 Hz = 243.8502 ppm = 0.384468 Hz/pt  
 number of scans: 15000

freq. of 0 ppm: 100.501162 MHz  
 processed size: 65536 complex points  
 LB: 0.500 GF: 0.0000  
 Hz/cm: 980.392 ppm/cm: 9.75401

Figure S8. <sup>13</sup>C NMR of Product 4.

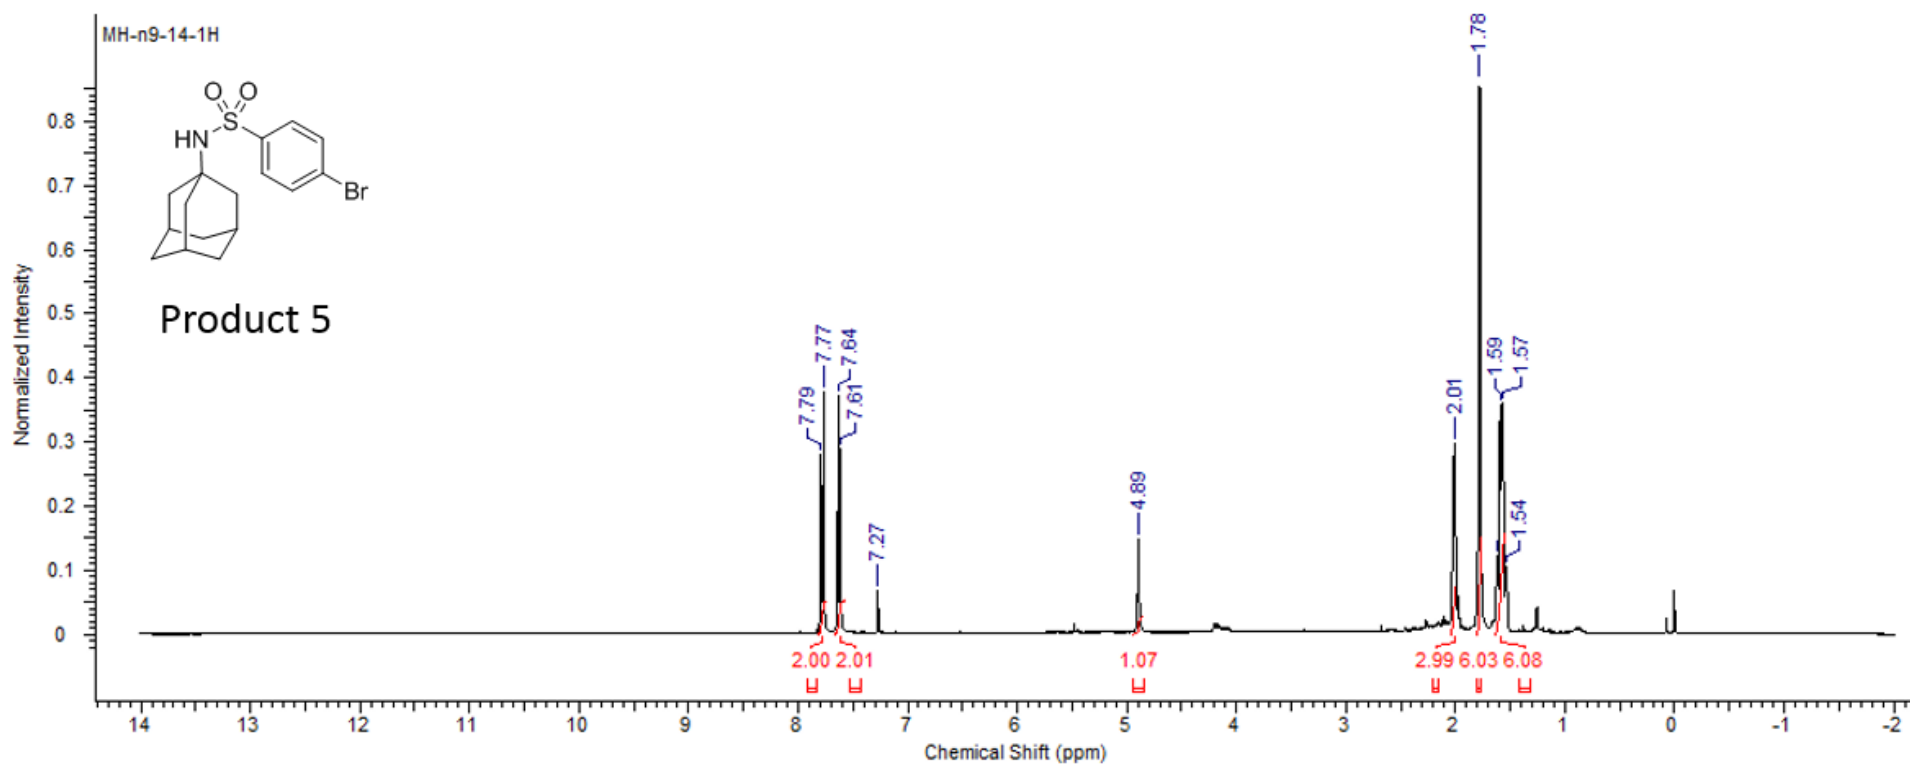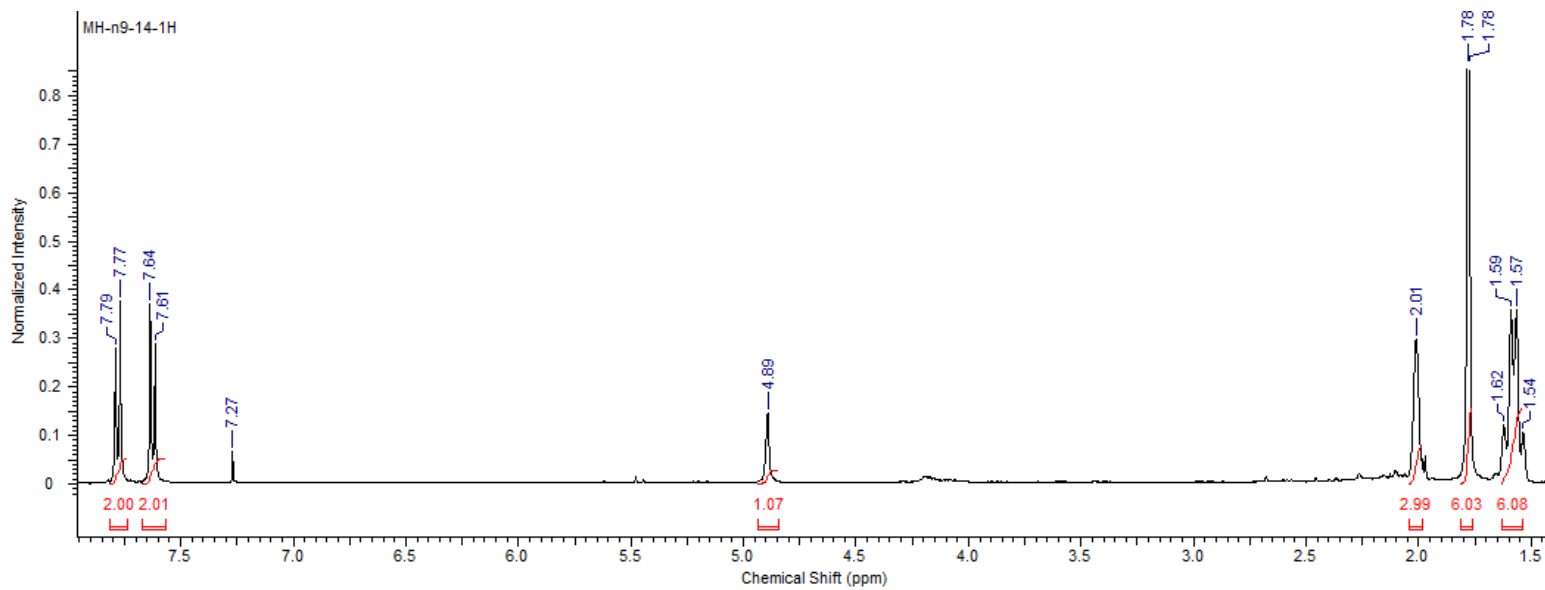

Figure S9. <sup>1</sup>H NMR of Product 5.

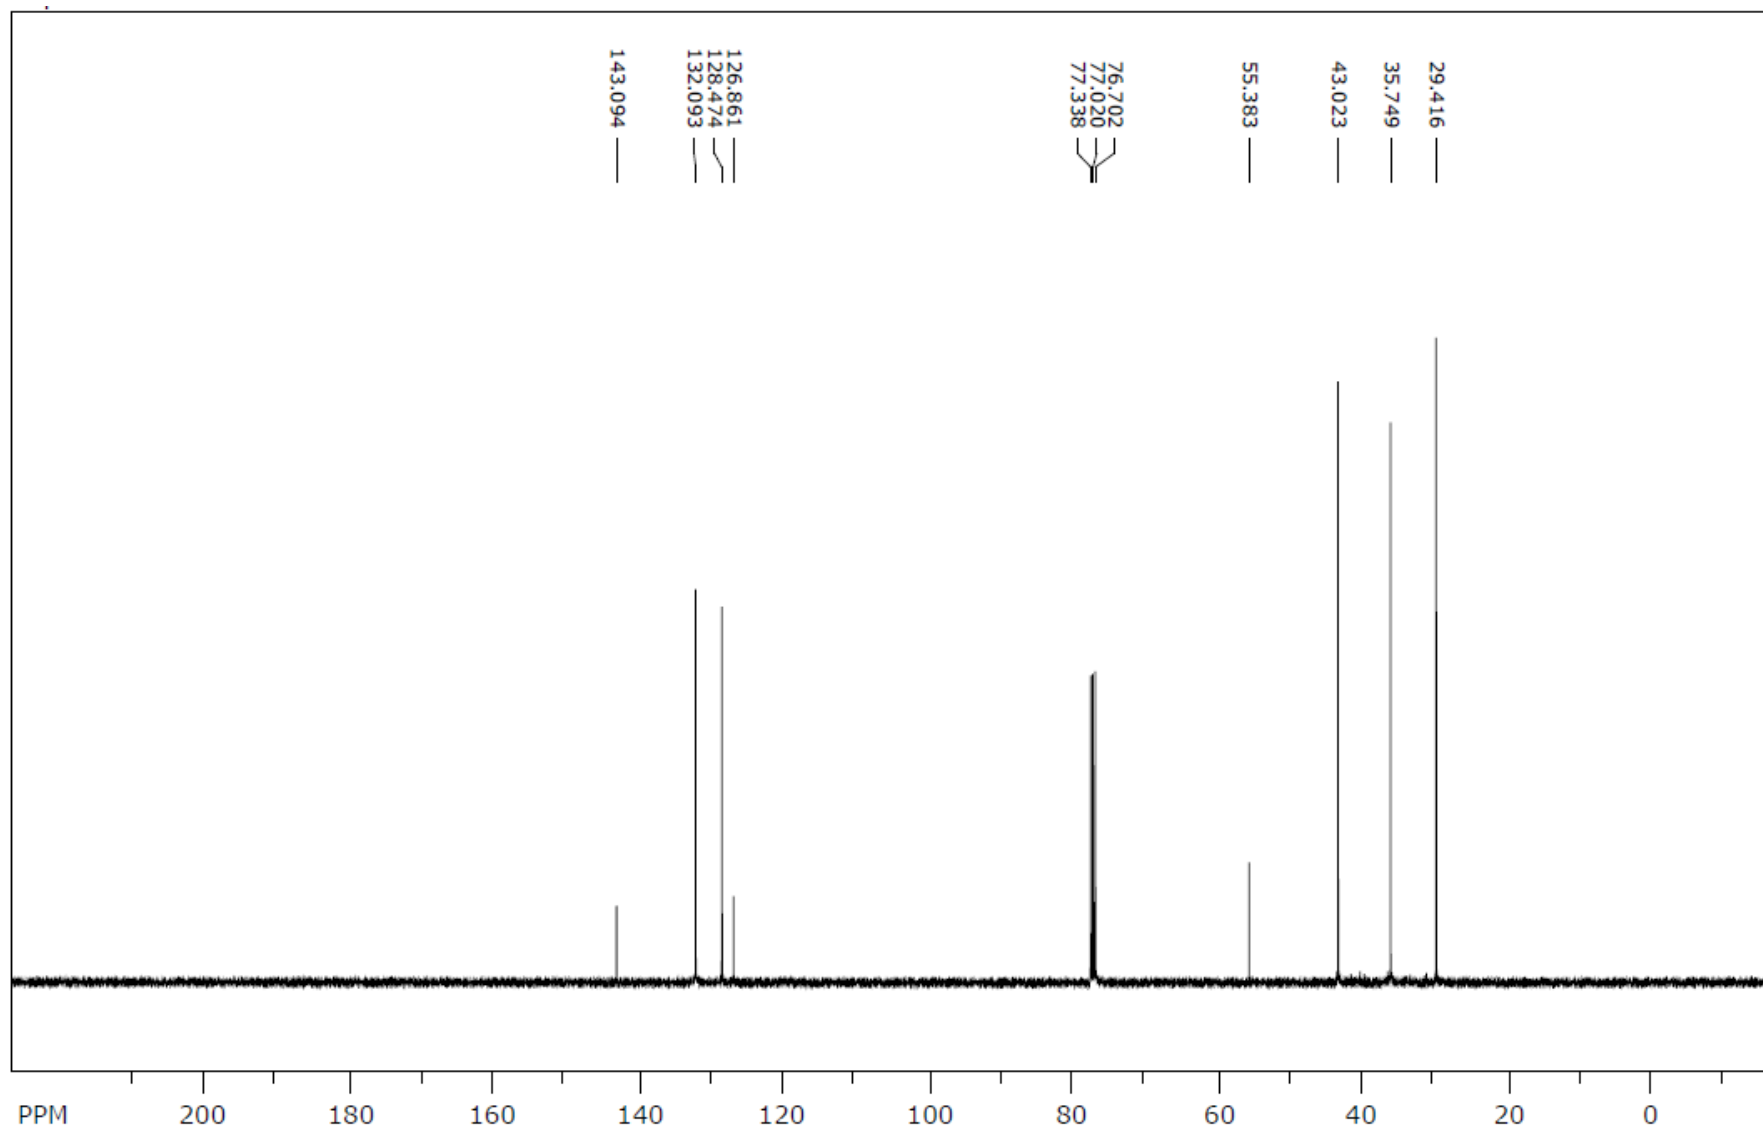

file: ...ntane, 4-BrPh\MH-n9-14-13C.fid\fid\_block# 1 expt: "s2pul"  
 transmitter freq.: 100.511715 MHz  
 time domain size: 63750 points  
 width: 24509.80 Hz = 243.8502 ppm = 0.384468 Hz/pt  
 number of scans: 1360

freq. of 0 ppm: 100.501163 MHz  
 processed size: 65536 complex points  
 LB: 0.500 GF: 0.0000  
 Hz/cm: 980.392 ppm/cm: 9.75401

**Figure S10.**  $^{13}\text{C}$  NMR of Product 5.

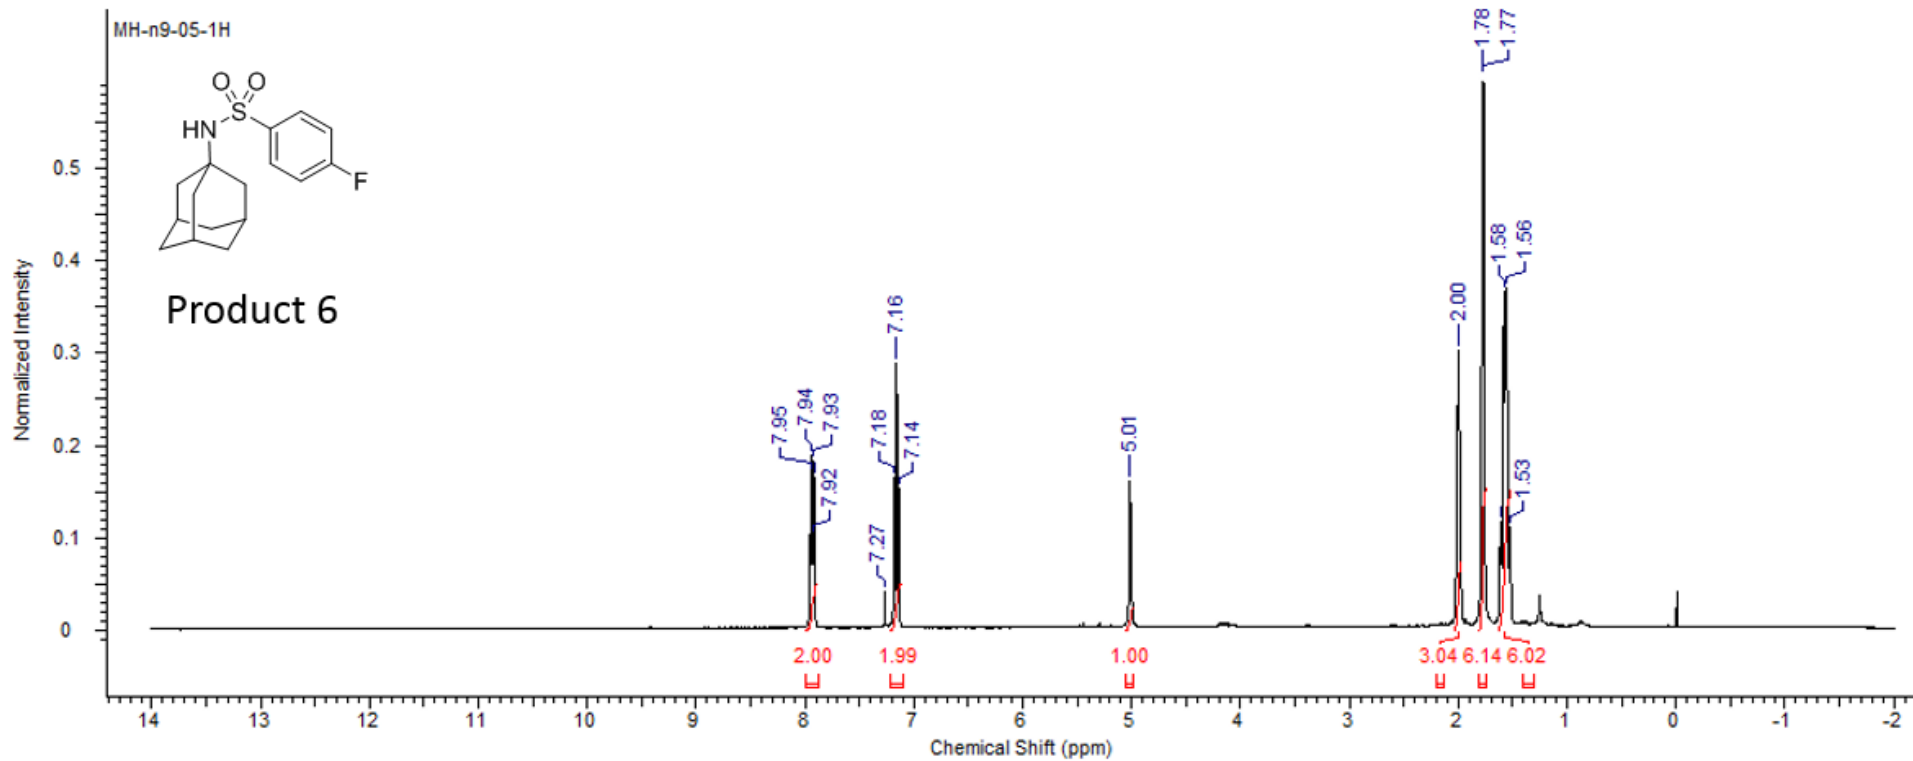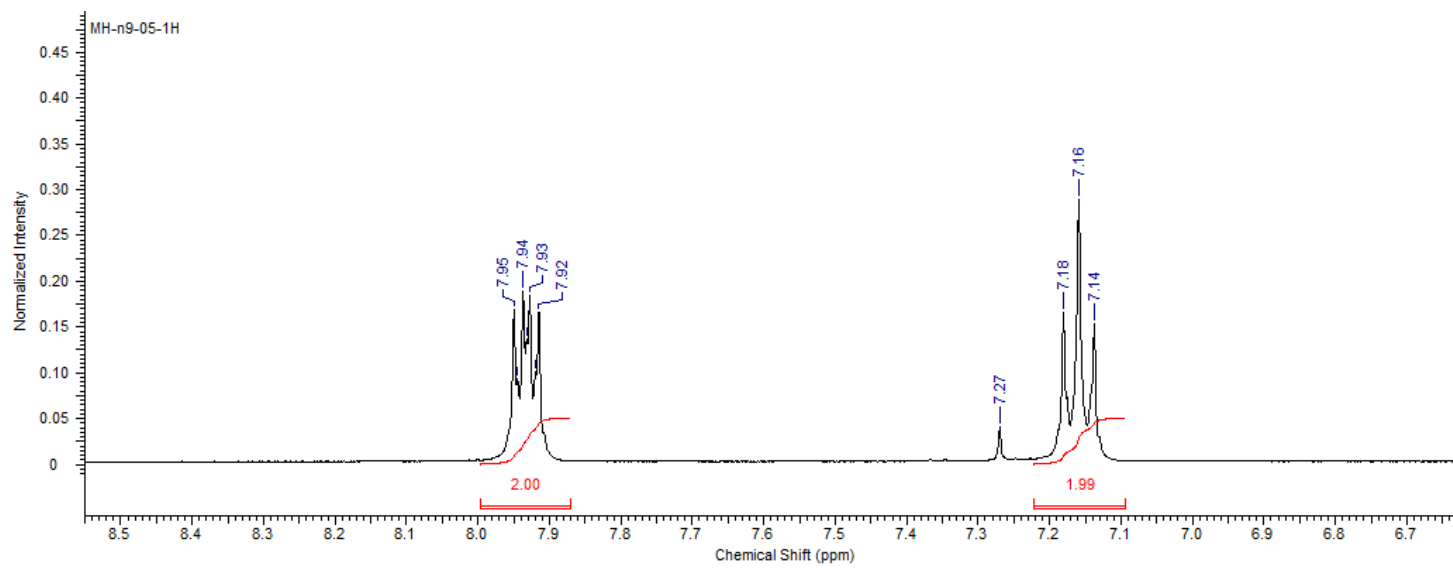

Figure S11. <sup>1</sup>H NMR of Product 6.

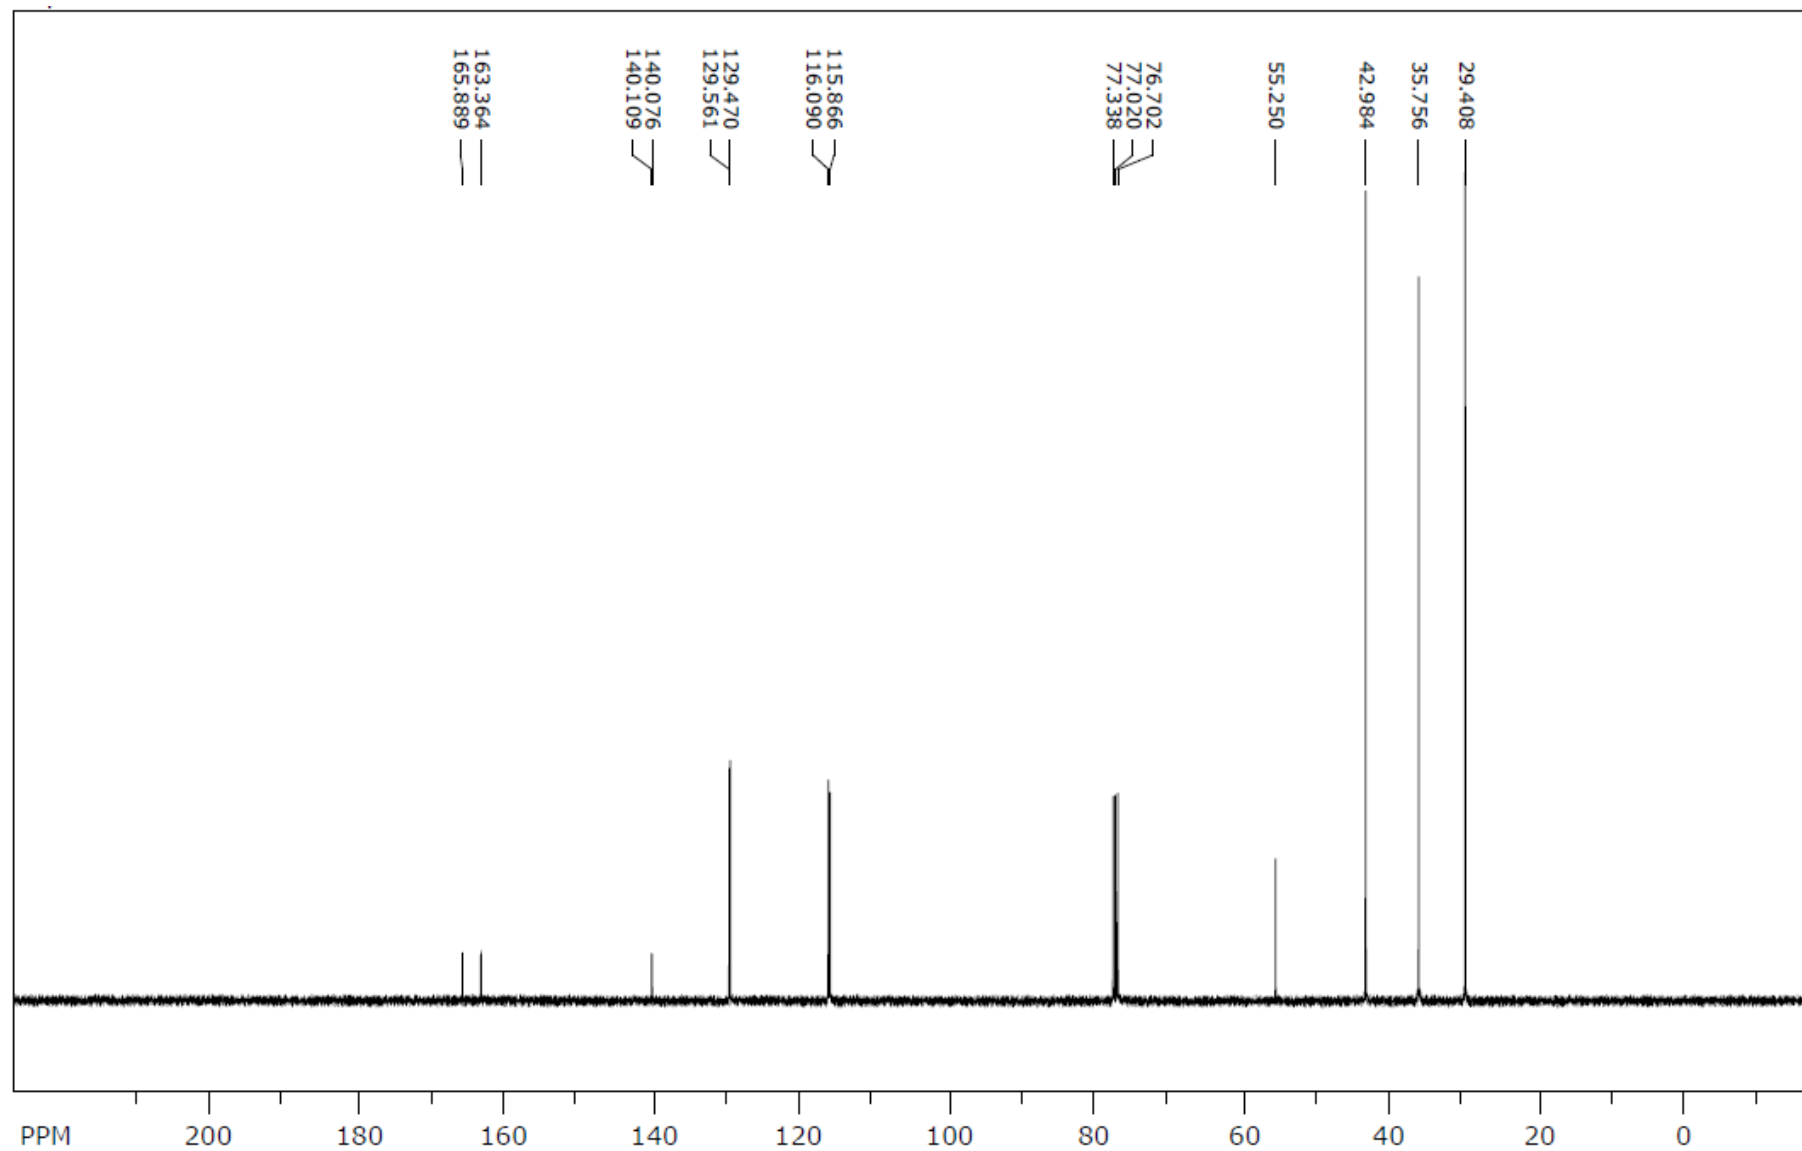

file: ...antane, 4-FPh\MH-n9-05-13C.fid\fid block# 1 expt: "s2pul"  
 transmitter freq.: 100.511715 MHz  
 time domain size: 63750 points  
 width: 24509.80 Hz = 243.8502 ppm = 0.384468 Hz/pt  
 number of scans: 1088

freq. of 0 ppm: 100.501164 MHz  
 processed size: 65536 complex points  
 LB: 0.500 GF: 0.0000  
 Hz/cm: 980.392 ppm/cm: 9.75401

Figure S12. <sup>13</sup>C NMR of Product 6.

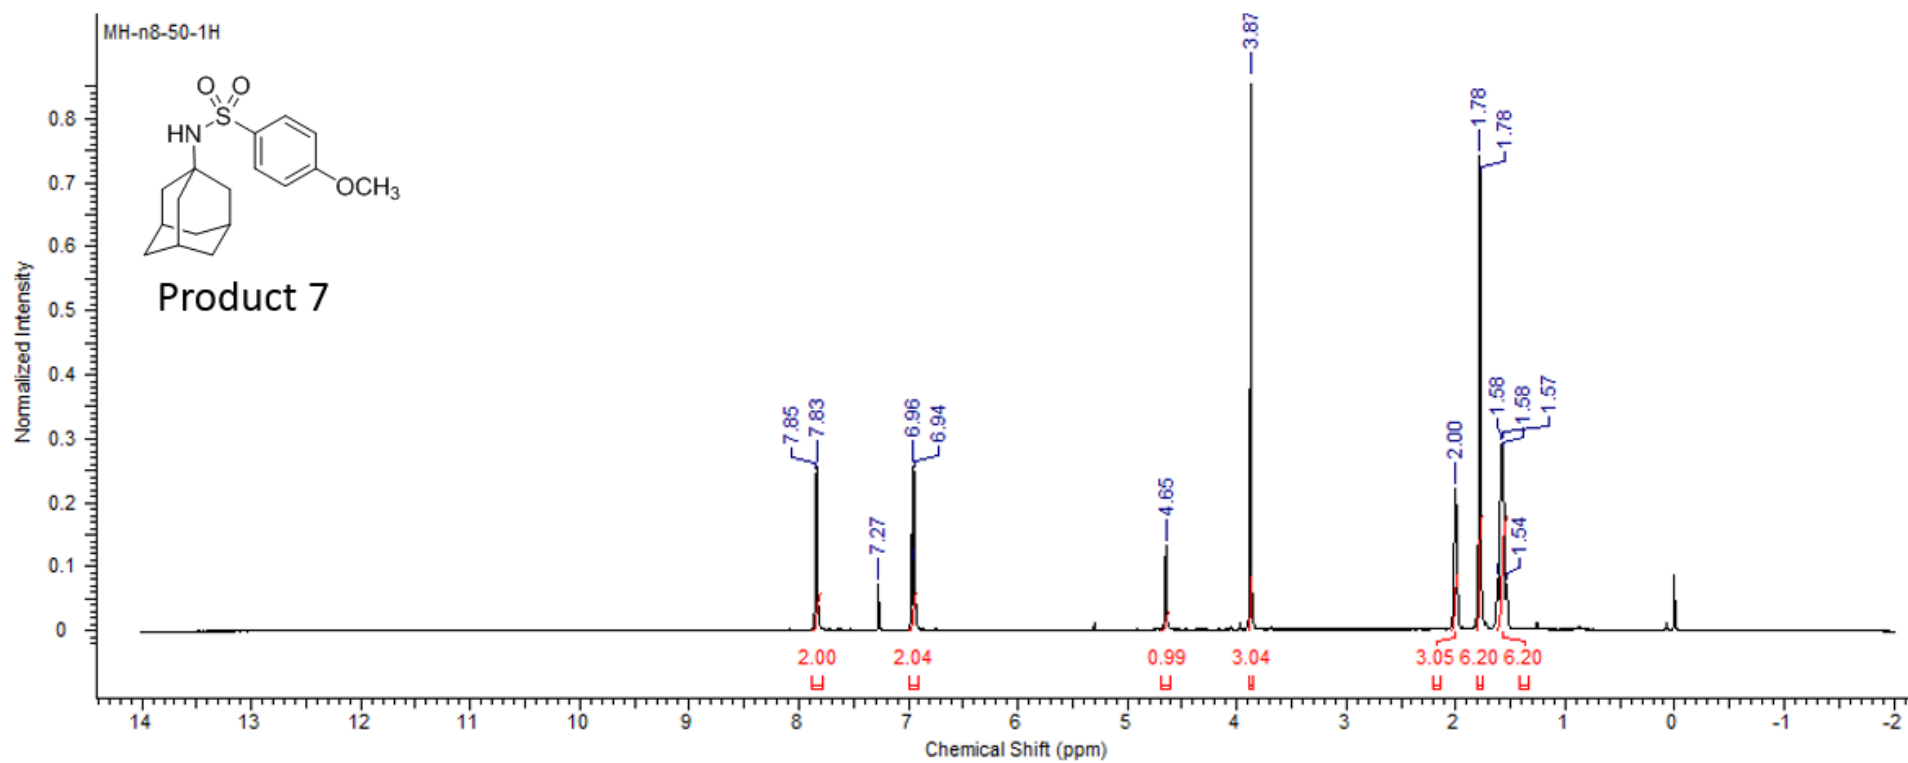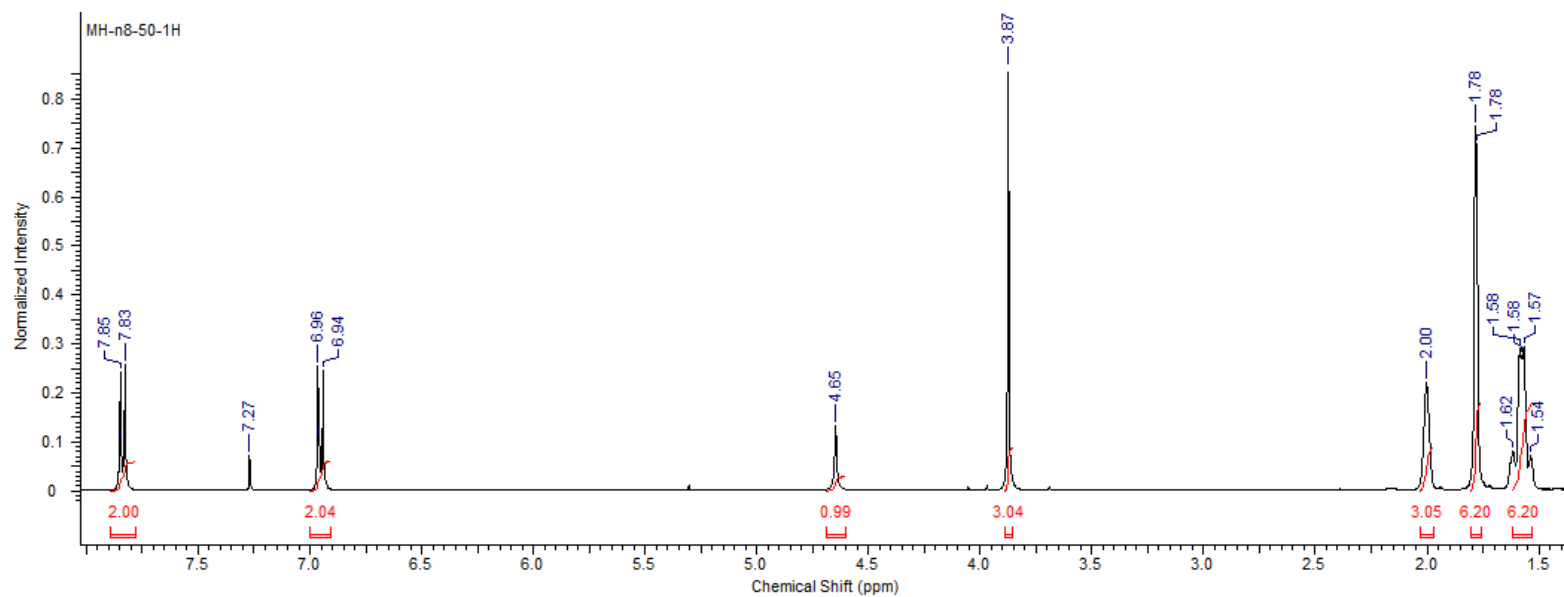

Figure S13.  $^1\text{H}$  NMR of Product 7.

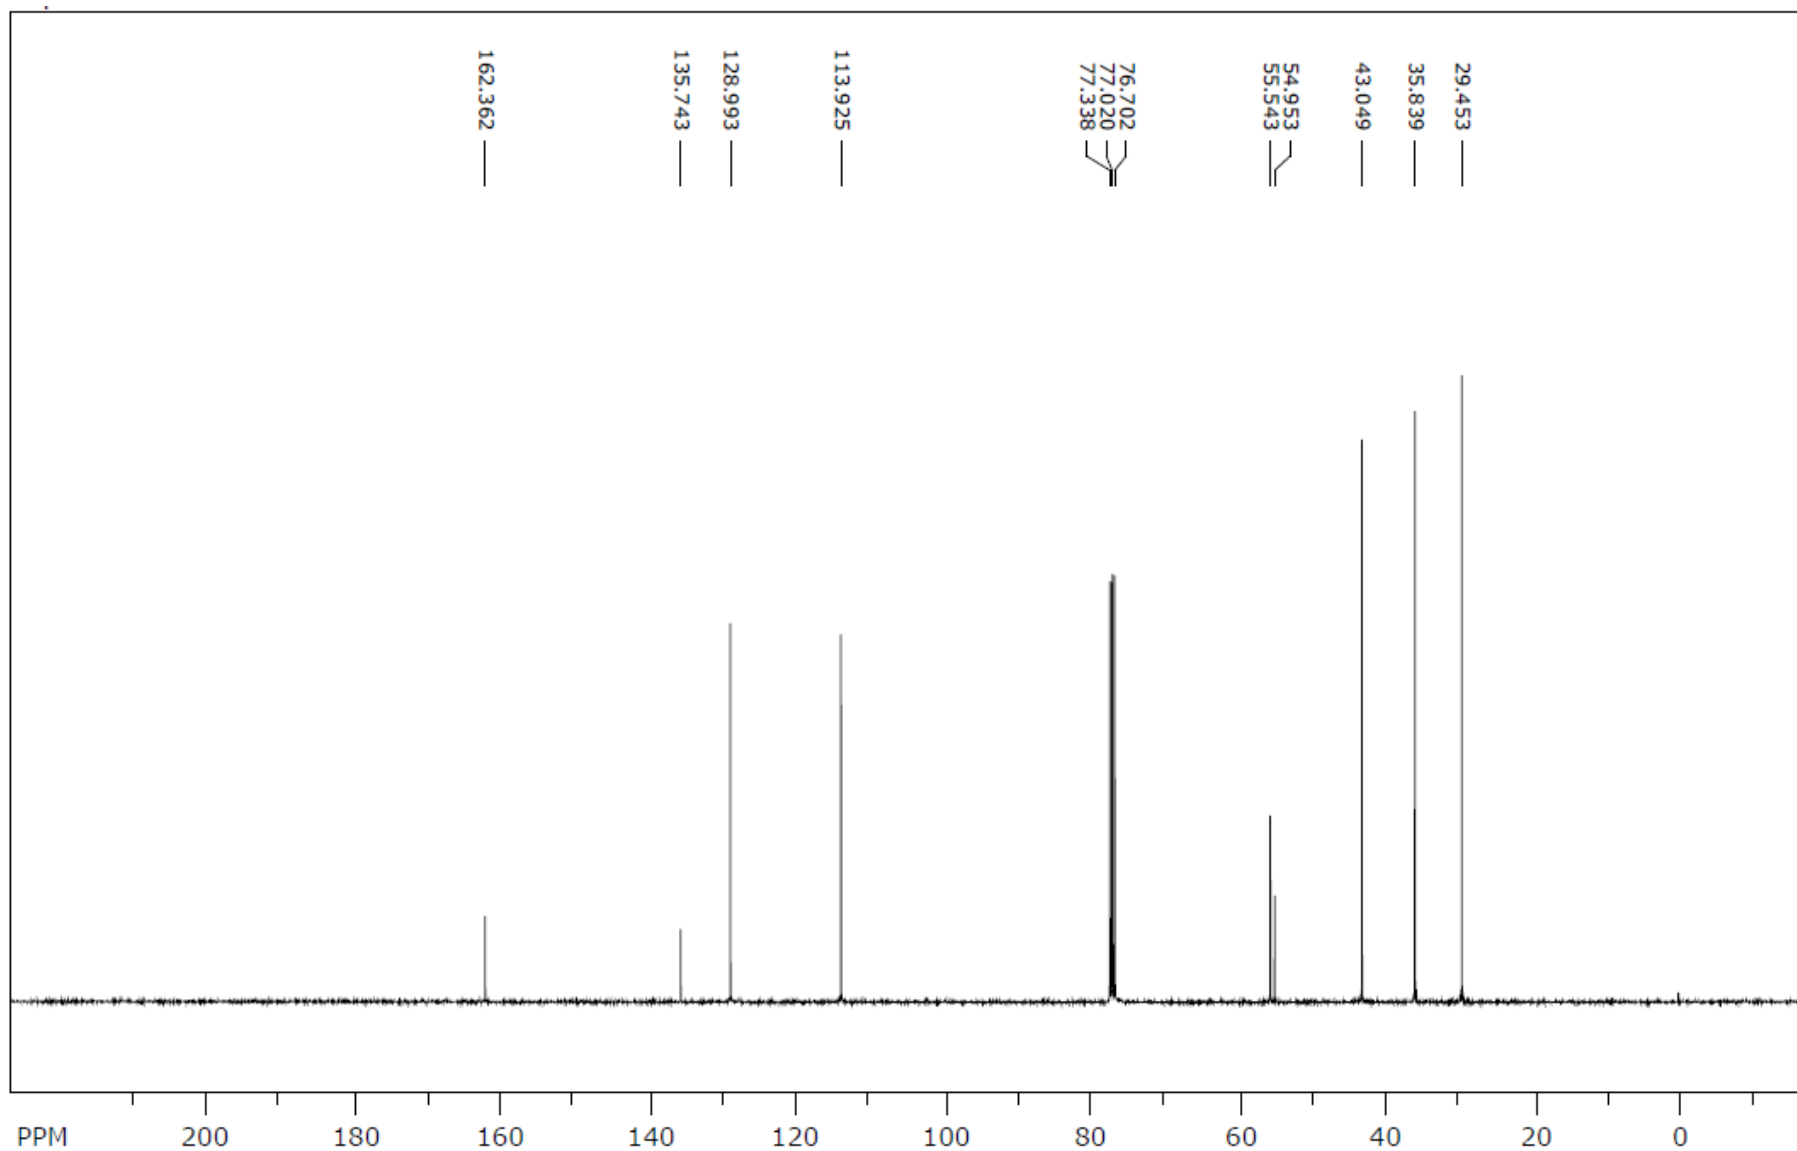

file: ...tane, 4-OMePh\MH-n8-50-13C.fid\fid\_block# 1 expt: "s2pul"  
 transmitter freq.: 100.511715 MHz  
 time domain size: 63750 points  
 width: 24509.80 Hz = 243.8502 ppm = 0.384468 Hz/pt  
 number of scans: 17000

freq. of 0 ppm: 100.501162 MHz  
 processed size: 65536 complex points  
 LB: 0.500 GF: 0.0000  
 Hz/cm: 980.392 ppm/cm: 9.75401

**Figure S14.** <sup>13</sup>C NMR of Product 7.

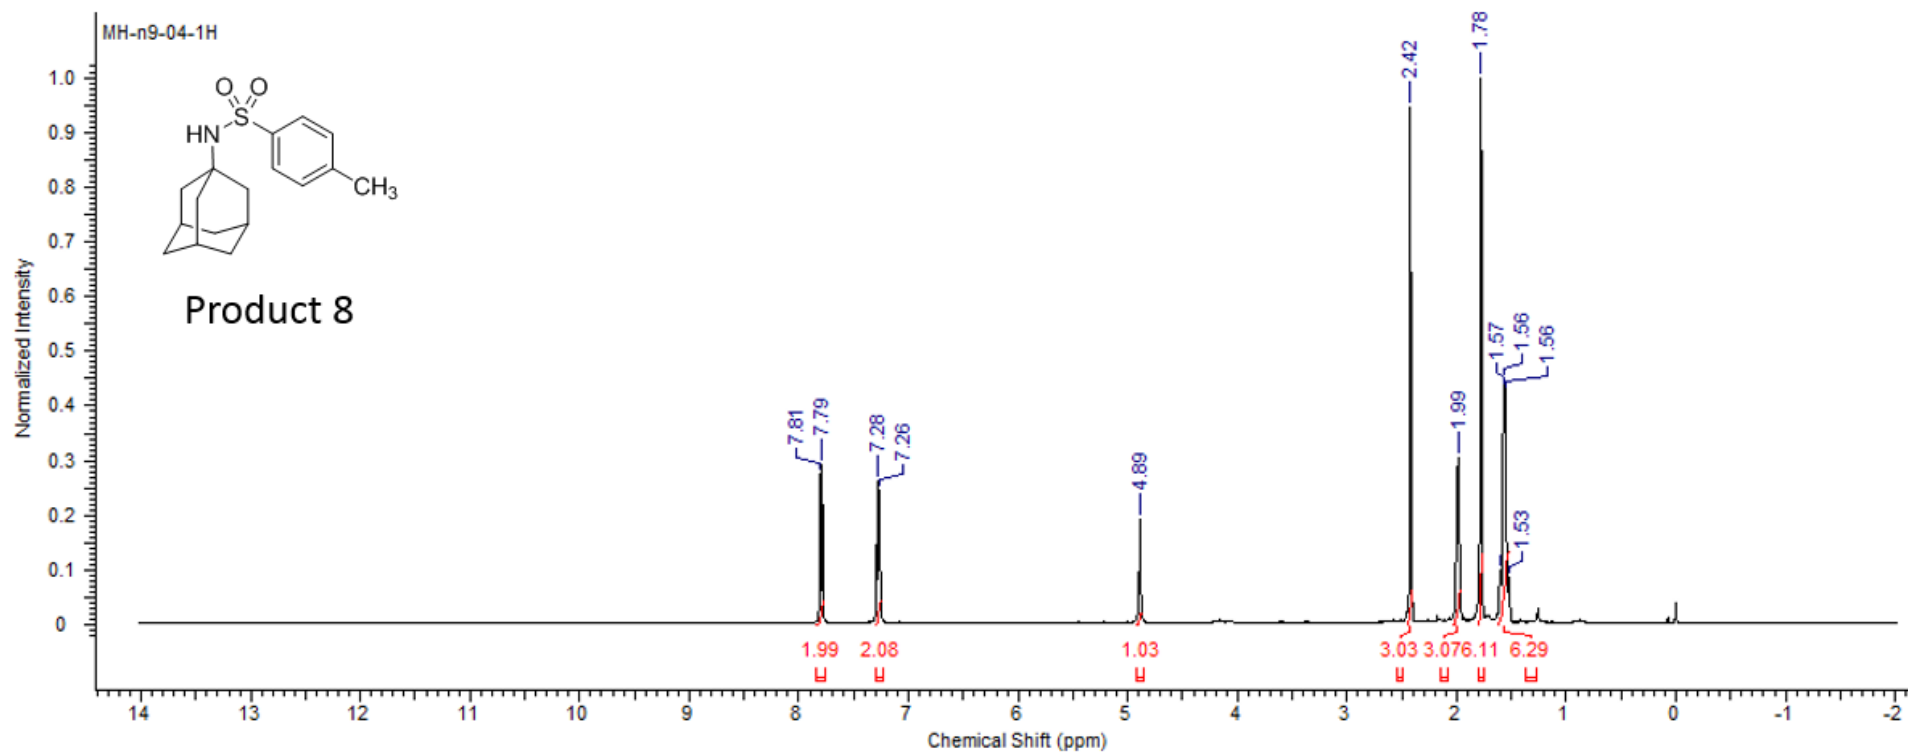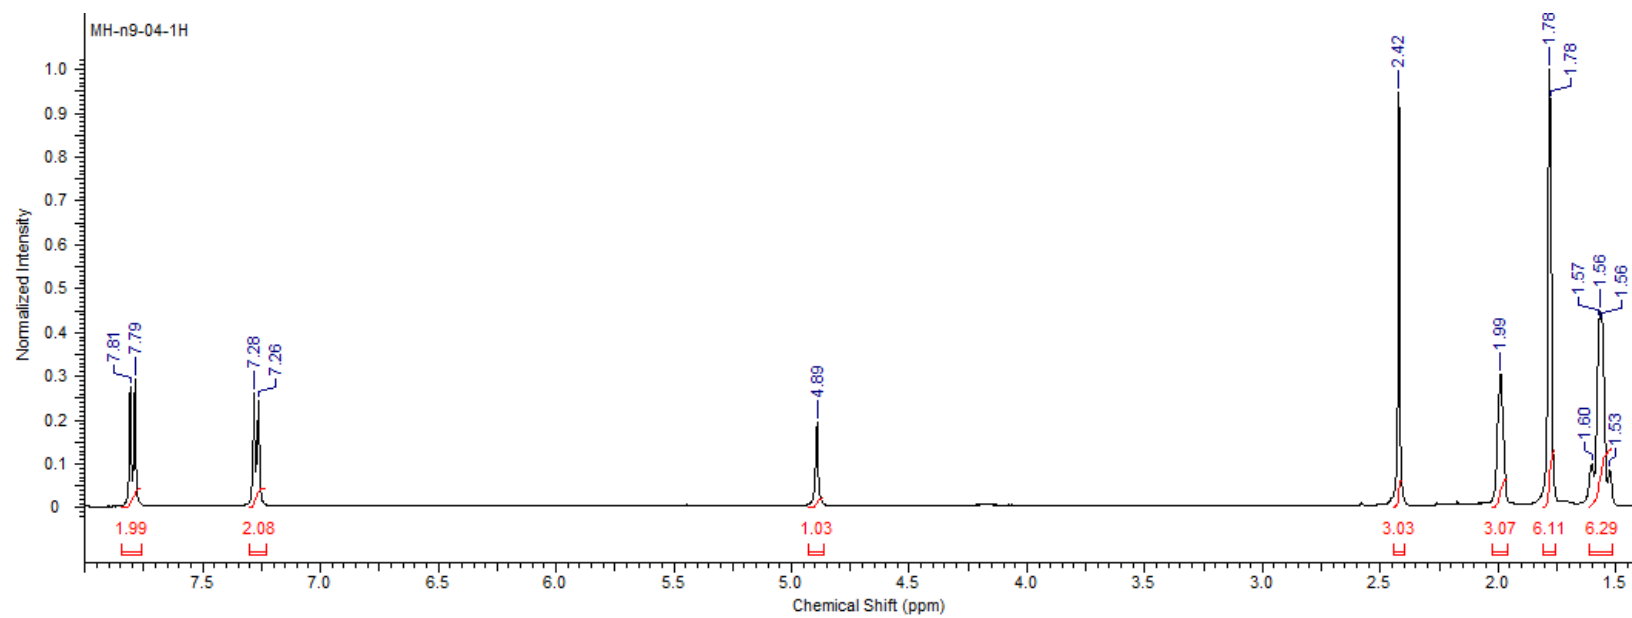

Figure S15.  $^1\text{H}$  NMR of Product 8.



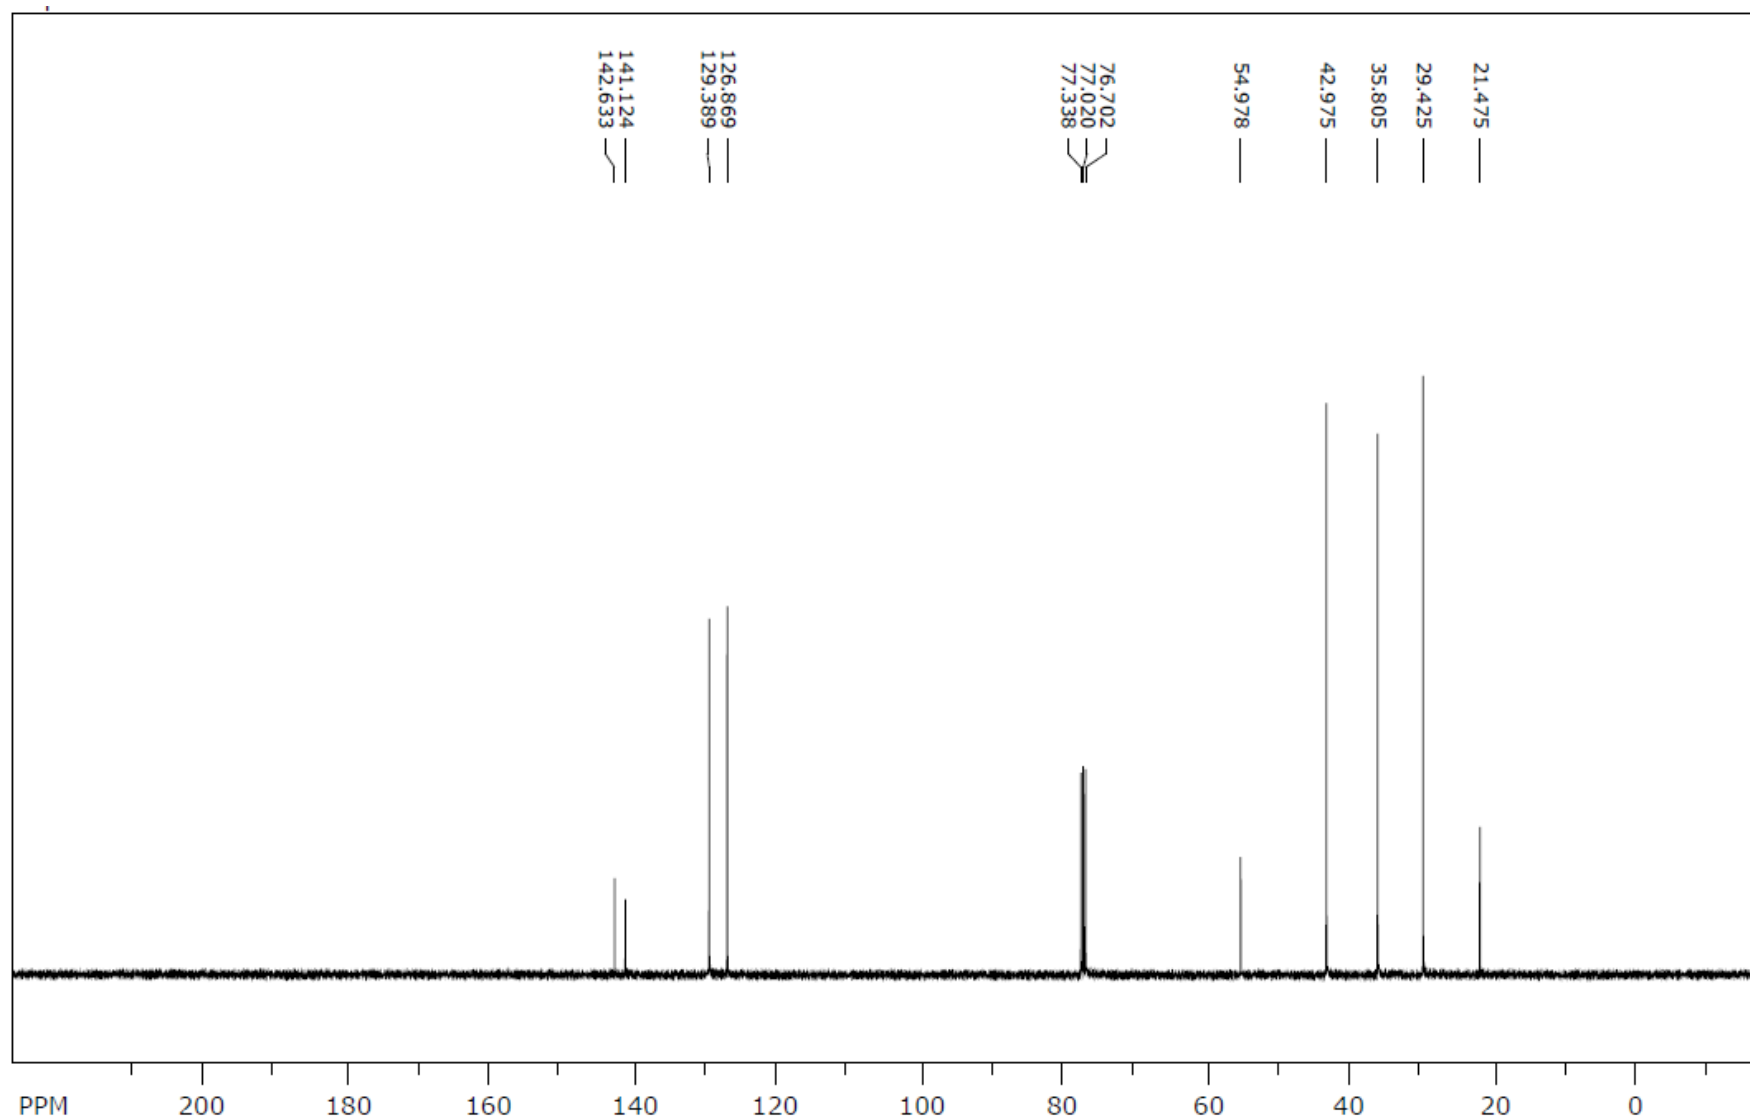

file: ...tane, 4-CH3Ph\MH-n9-04-13C.fid\fid block# 1 expt: "s2pul"  
transmitter freq.: 100.511715 MHz  
time domain size: 63750 points  
width: 24509.80 Hz = 243.8502 ppm = 0.384468 Hz/pt  
number of scans: 1120

freq. of 0 ppm: 100.501164 MHz  
processed size: 65536 complex points  
LB: 0.500 GF: 0.0000  
Hz/cm: 980.392 ppm/cm: 9.75401

Figure S16. <sup>13</sup>C NMR of Product 8.

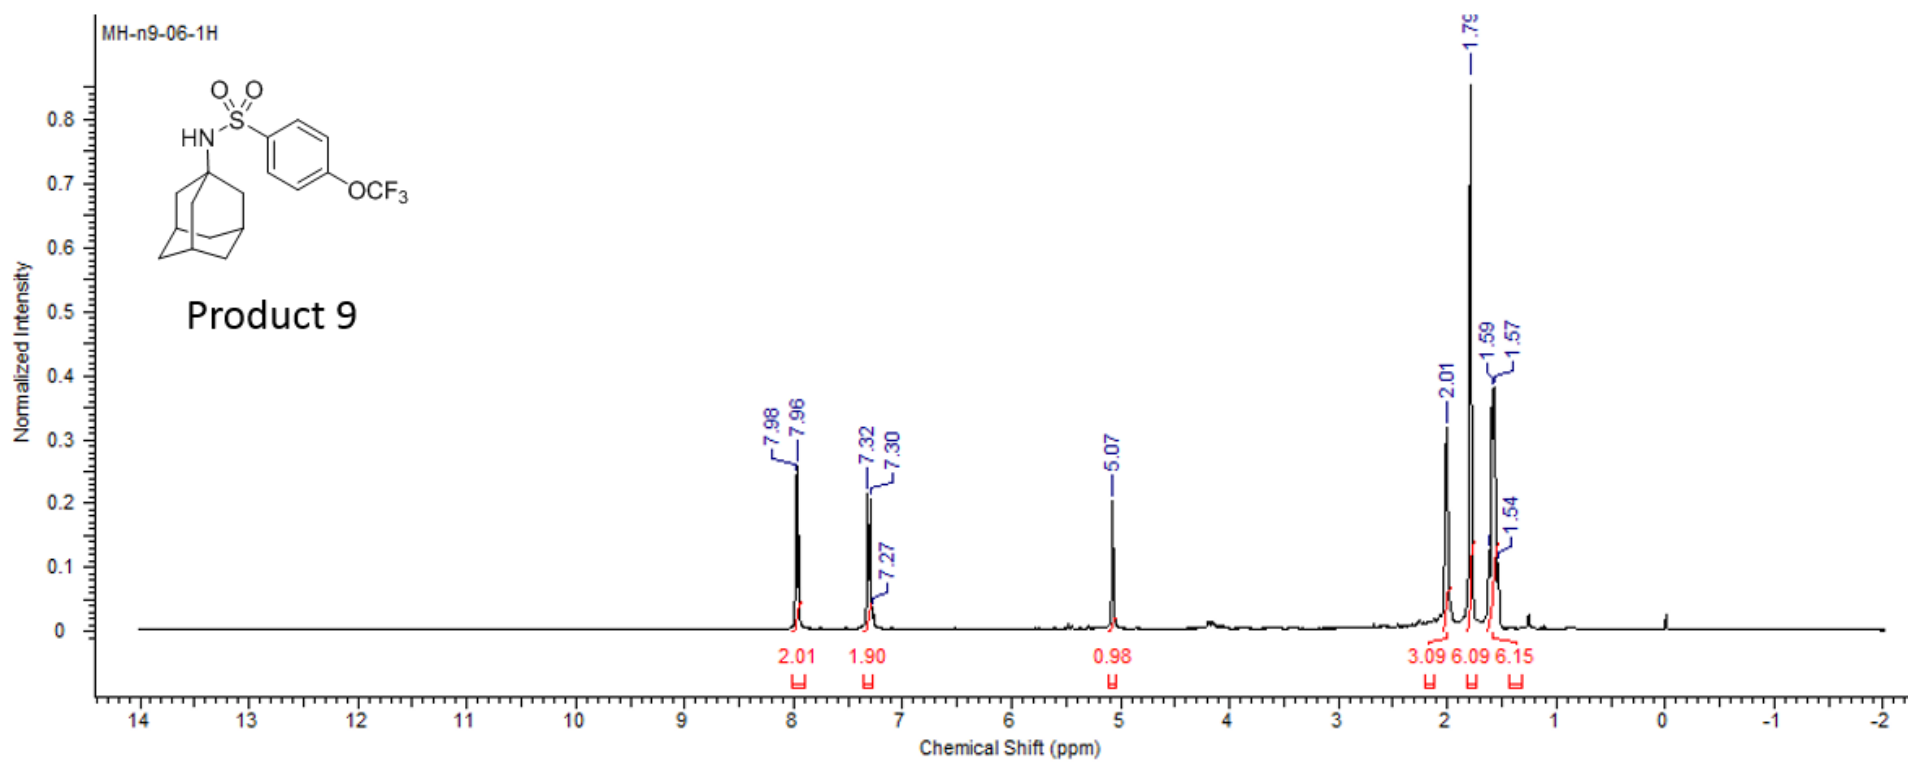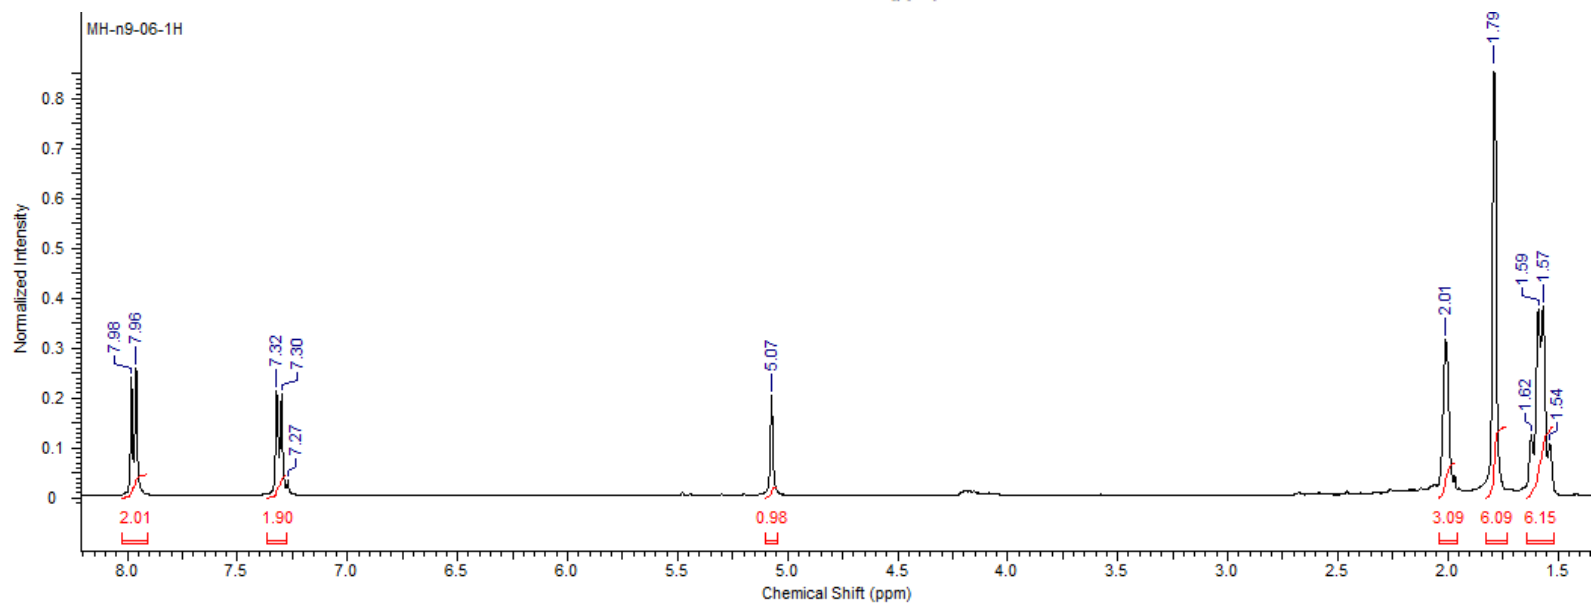

Figure S17.  $^1\text{H}$  NMR of Product 9.

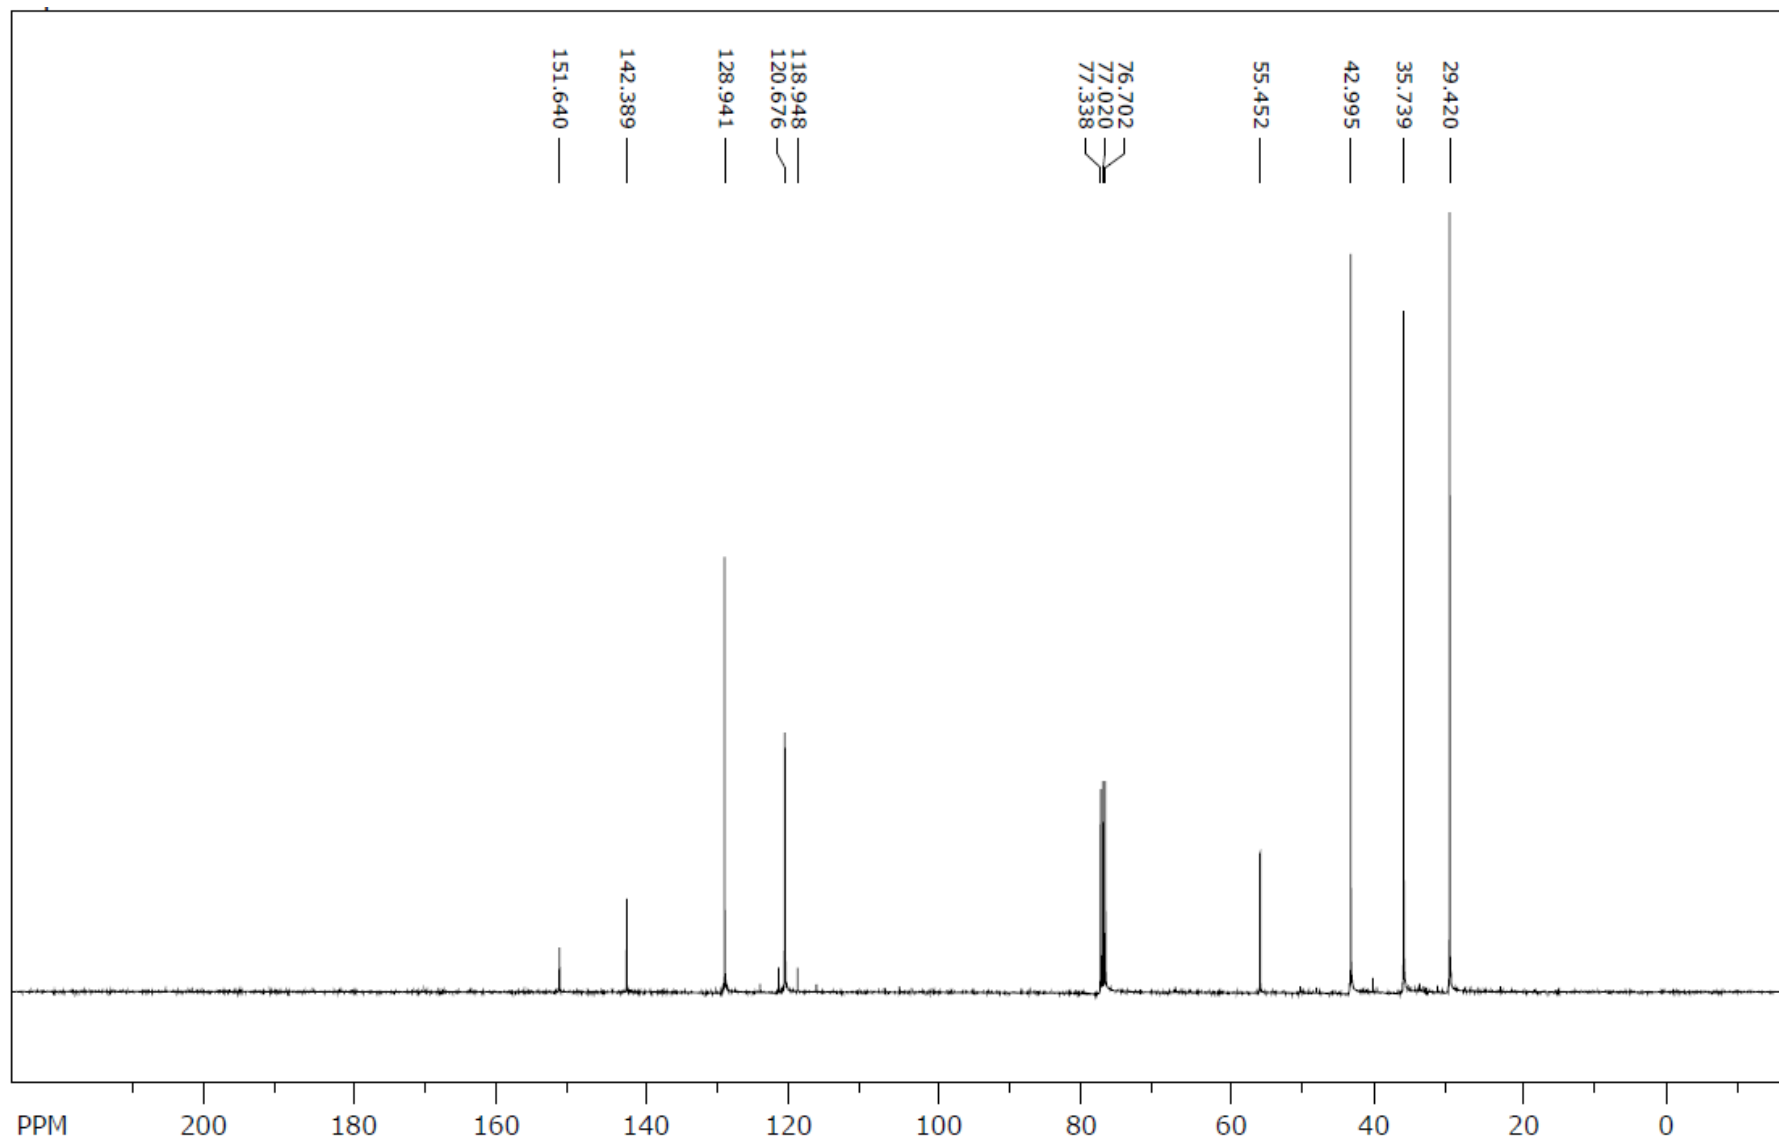

file: ...ane, 4-OCF3Ph\MH-n9-06-13C.fid\fid\_block# 1 expt: "s2pul"  
transmitter freq.: 100.511715 MHz  
time domain size: 63750 points  
width: 24509.80 Hz = 243.8502 ppm = 0.384468 Hz/pt  
number of scans: 17000

freq. of 0 ppm: 100.501162 MHz  
processed size: 65536 complex points  
LB: 0.500 GF: 0.0000  
Hz/cm: 980.392 ppm/cm: 9.75401

**Figure S18.** <sup>13</sup>C NMR of Product 9.

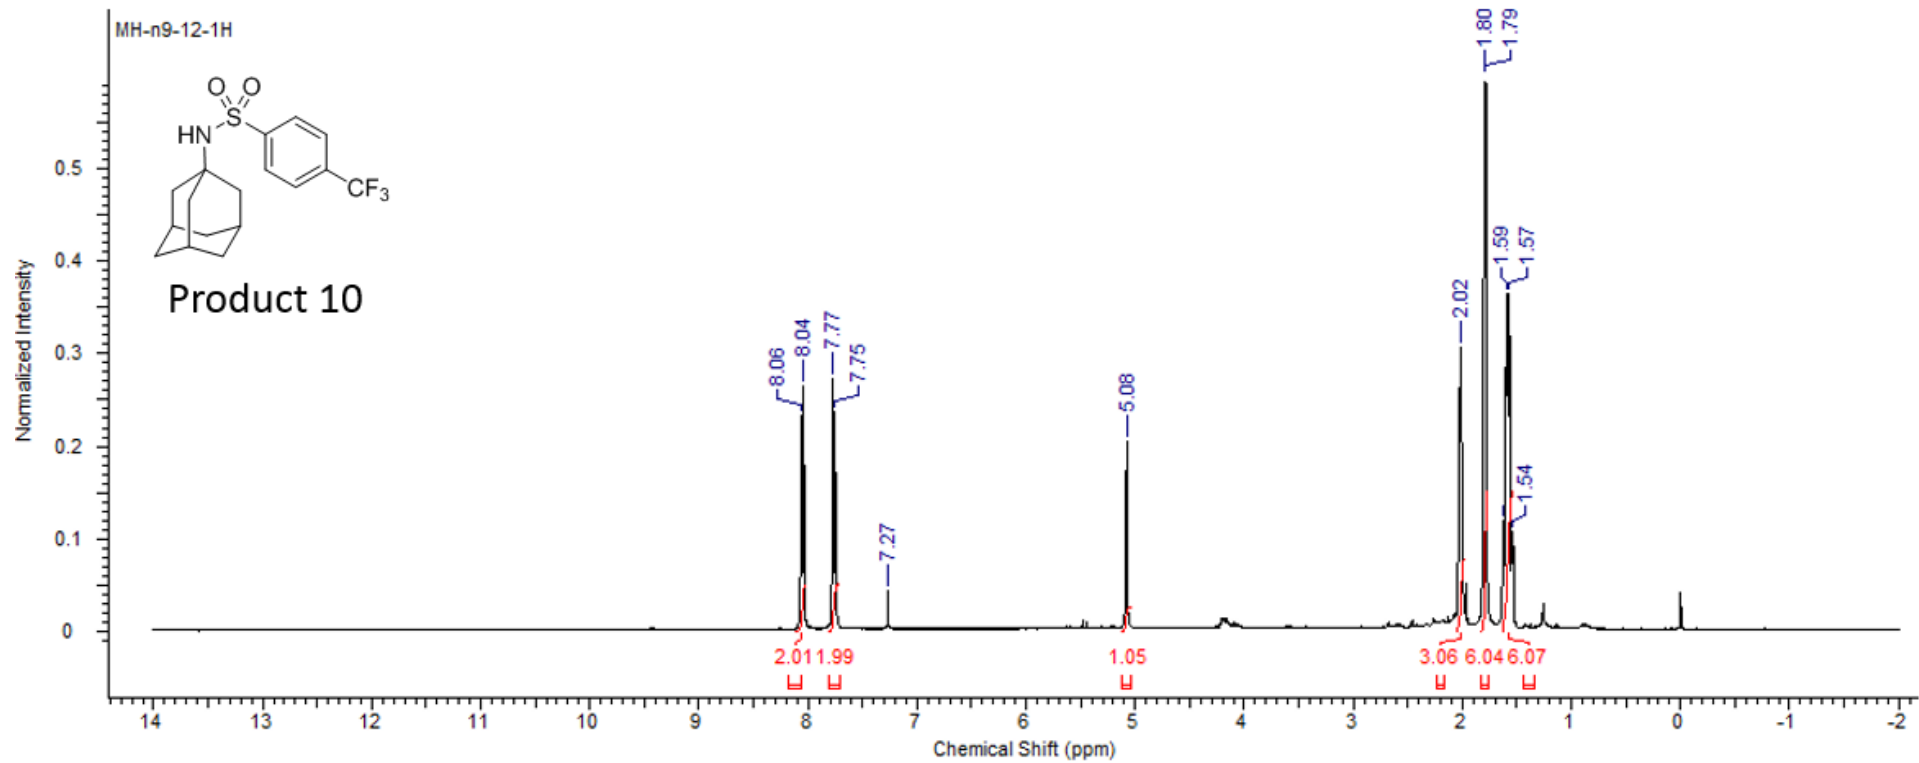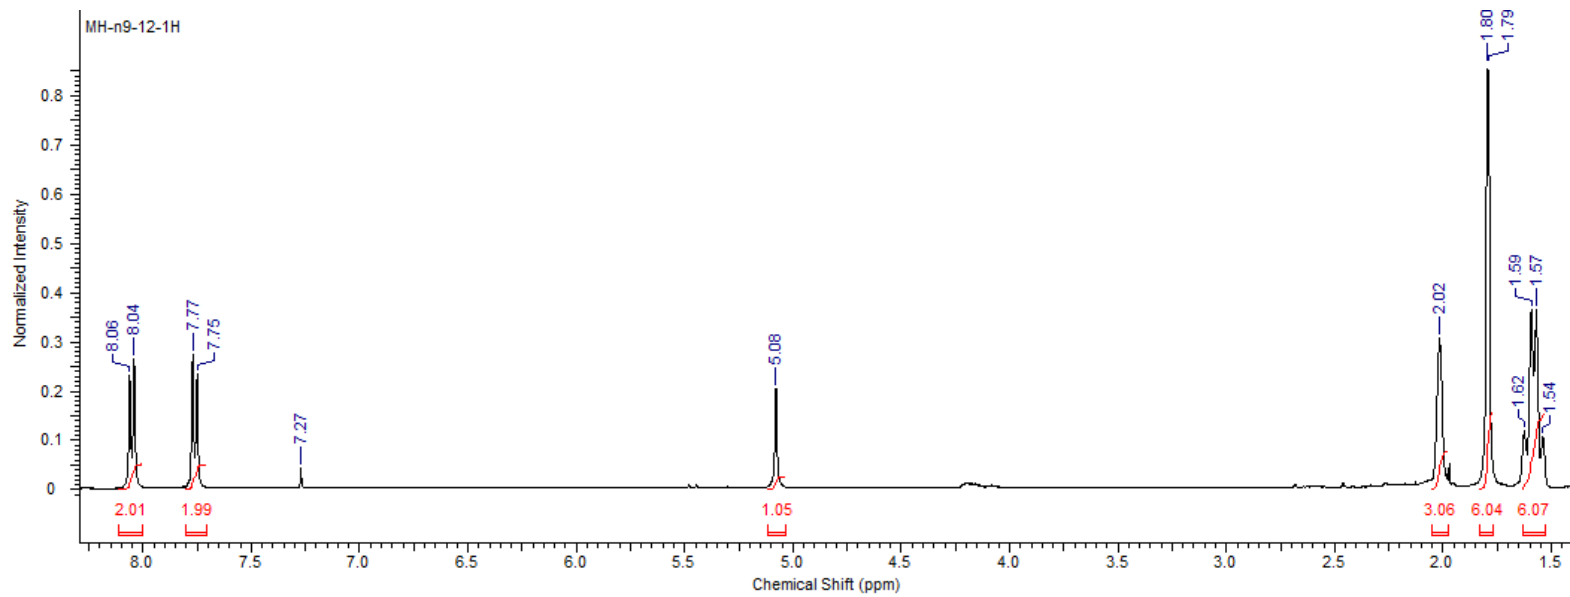

Figure S19.  $^1\text{H}$  NMR of Product 10.

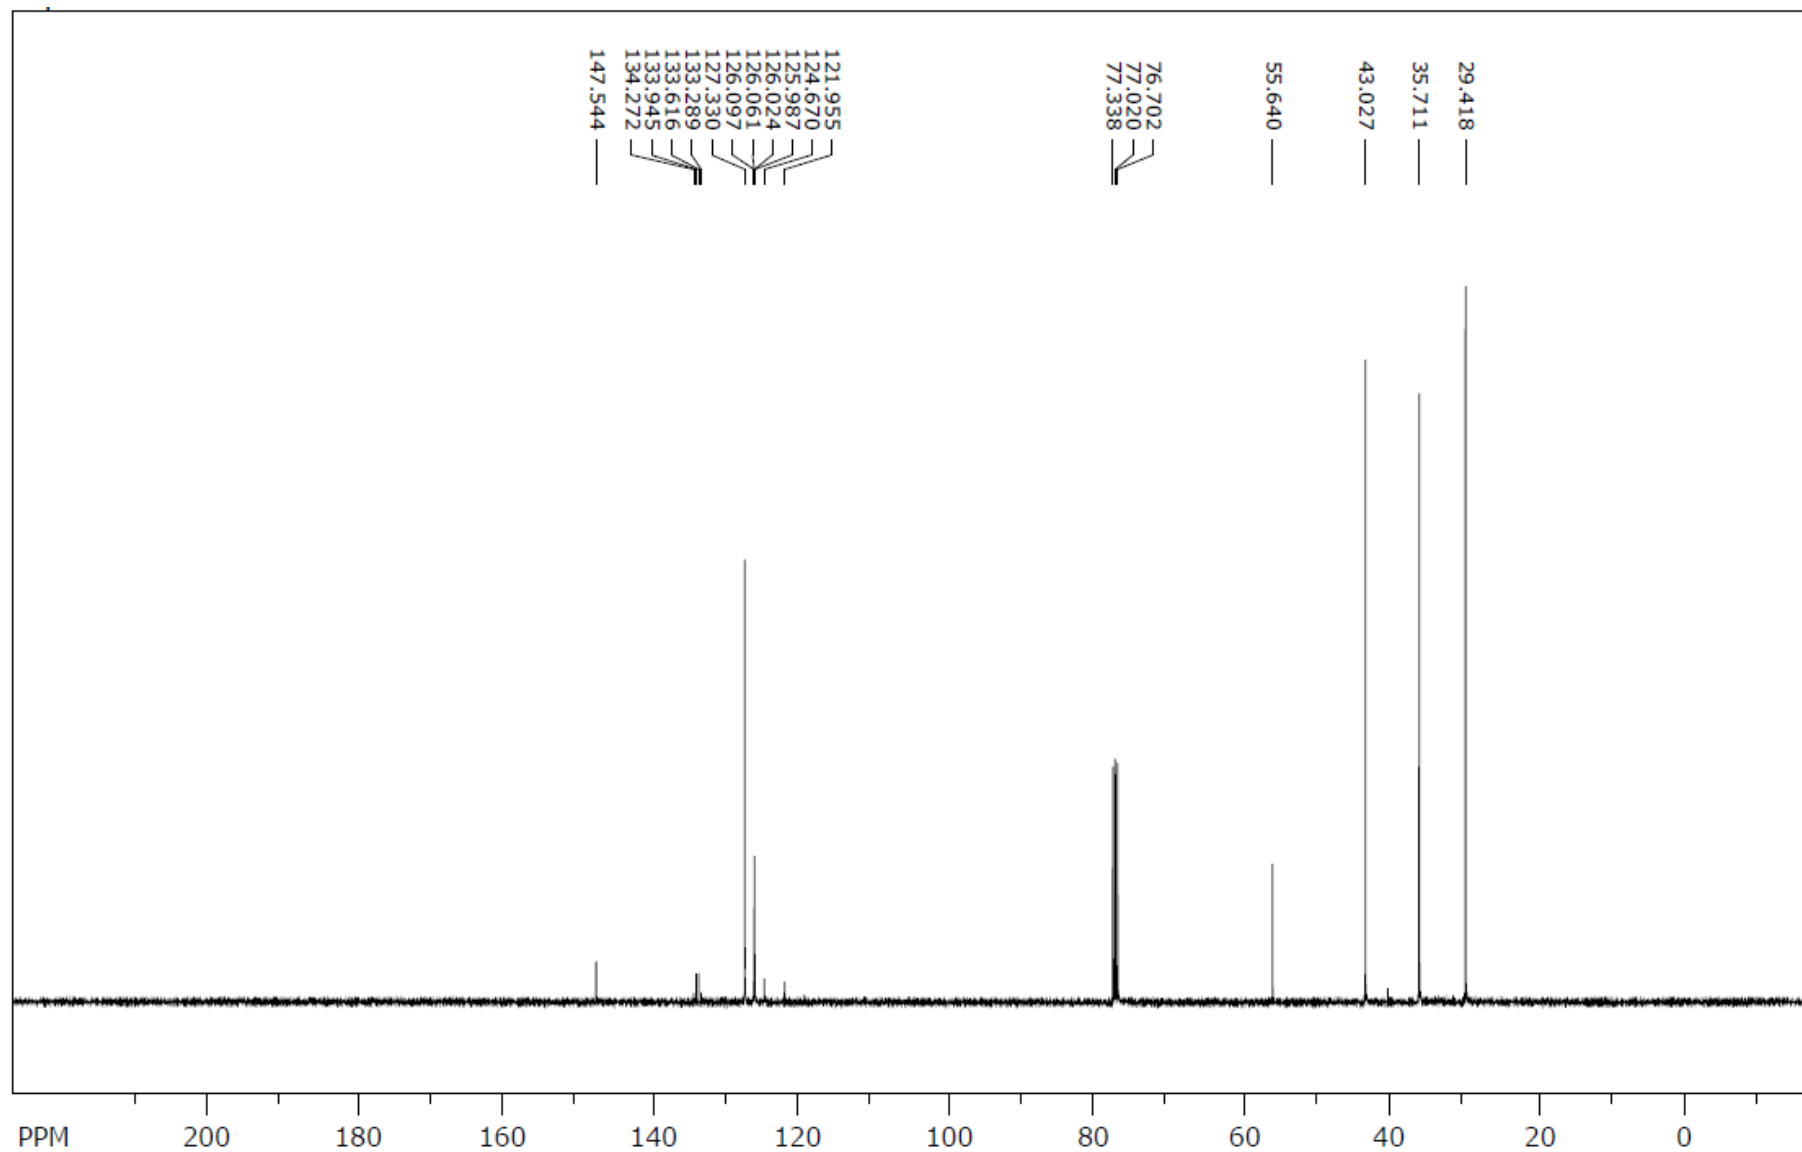

file: ...tane, 4-CF3Ph\MH-n9-12-13C.fid\fid block# 1 expt: "s2pul"  
 transmitter freq.: 100.511715 MHz  
 time domain size: 63750 points  
 width: 24509.80 Hz = 243.8502 ppm = 0.384468 Hz/pt  
 number of scans: 2496

freq. of 0 ppm: 100.501162 MHz  
 processed size: 65536 complex points  
 LB: 0.500 GF: 0.0000  
 Hz/cm: 980.392 ppm/cm: 9.75401

**Figure S20.**  $^{13}\text{C}$  NMR of Product **10**.

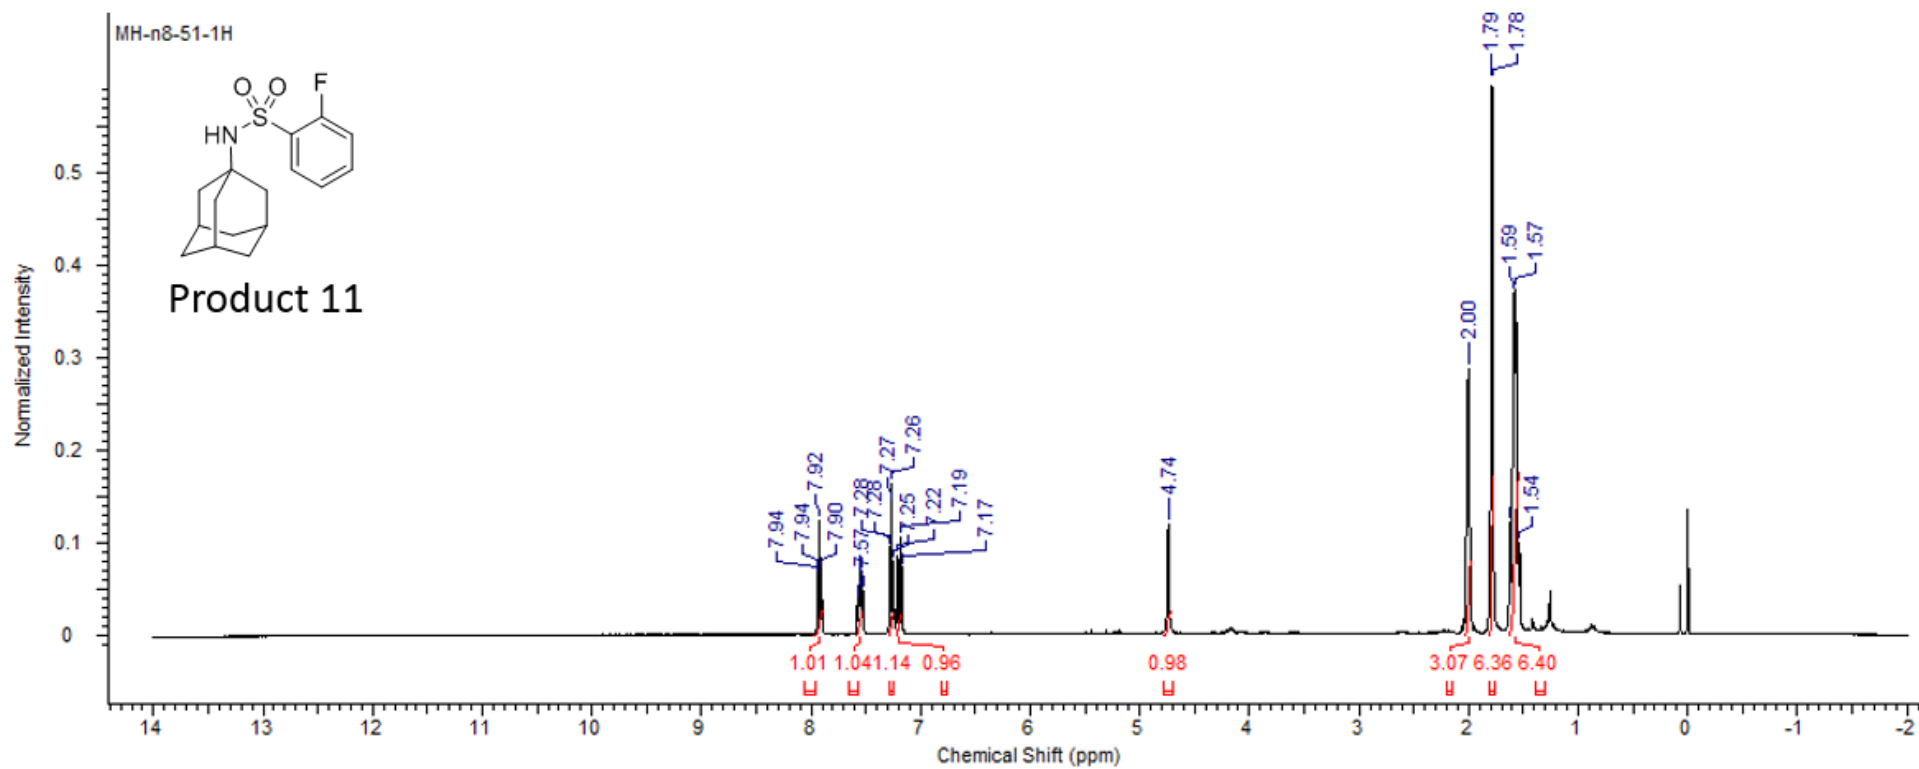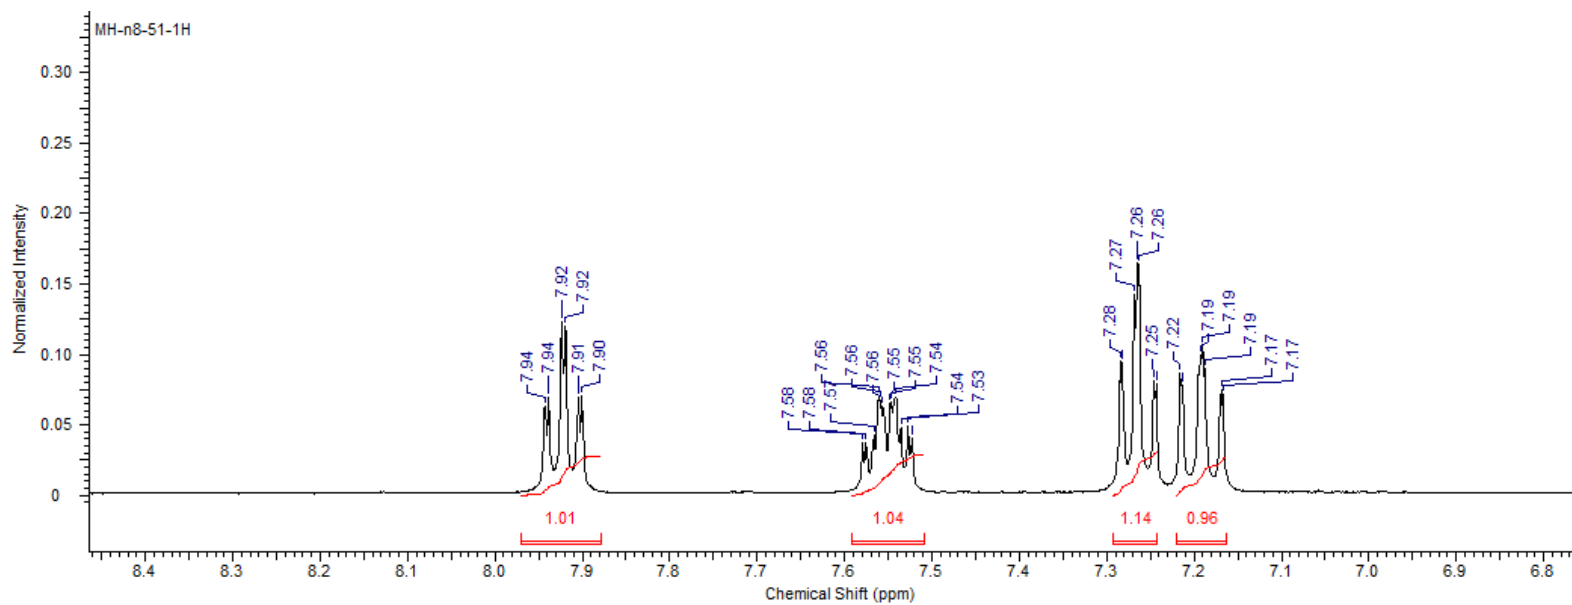

Figure S21.  $^1\text{H}$  NMR of Product 11.

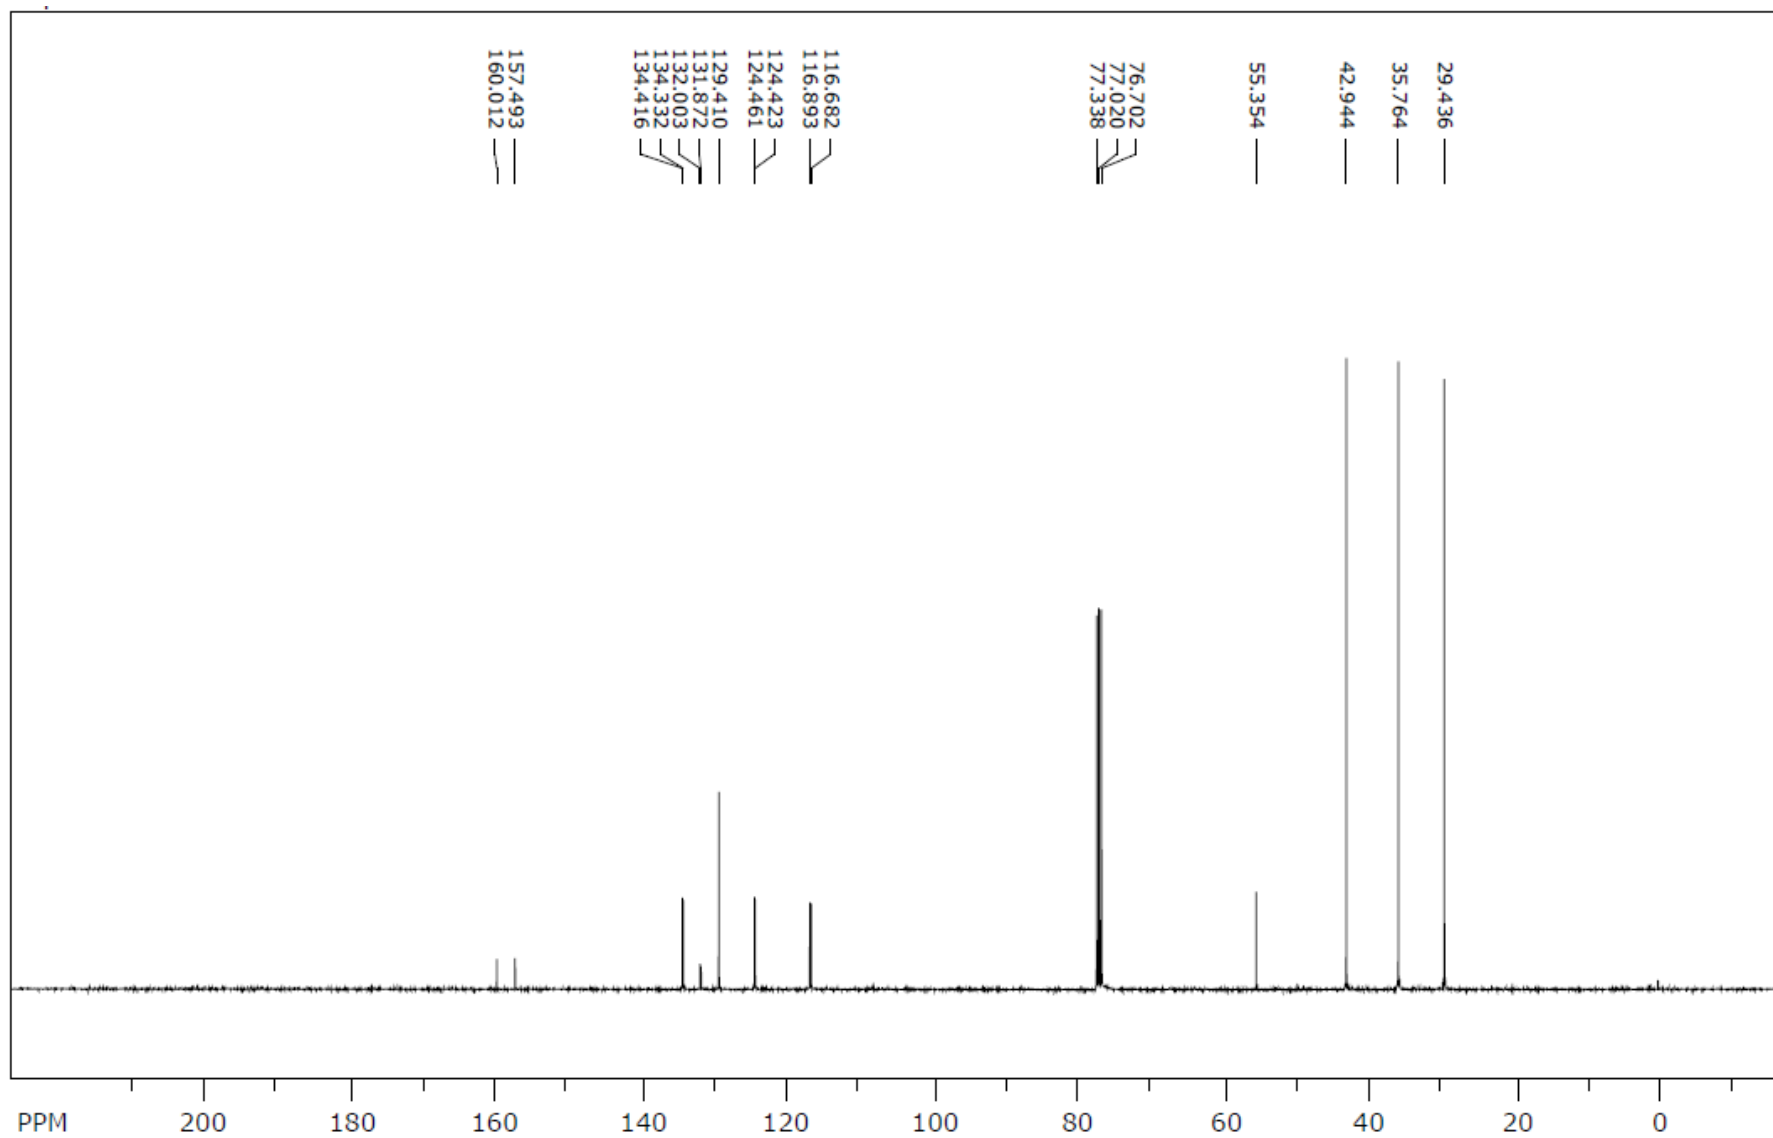

file: ...antane, 2-FPh\MH-n8-51-13C.fid\fid\_block# 1 expt: "s2pul"  
 transmitter freq.: 100.511715 MHz  
 time domain size: 63750 points  
 width: 24509.80 Hz = 243.8502 ppm = 0.384468 Hz/pt  
 number of scans: 17500

freq. of 0 ppm: 100.501162 MHz  
 processed size: 65536 complex points  
 LB: 0.500 GF: 0.0000  
 Hz/cm: 980.392 ppm/cm: 9.75401

**Figure S22.**  $^{13}\text{C}$  NMR of Product **11**.

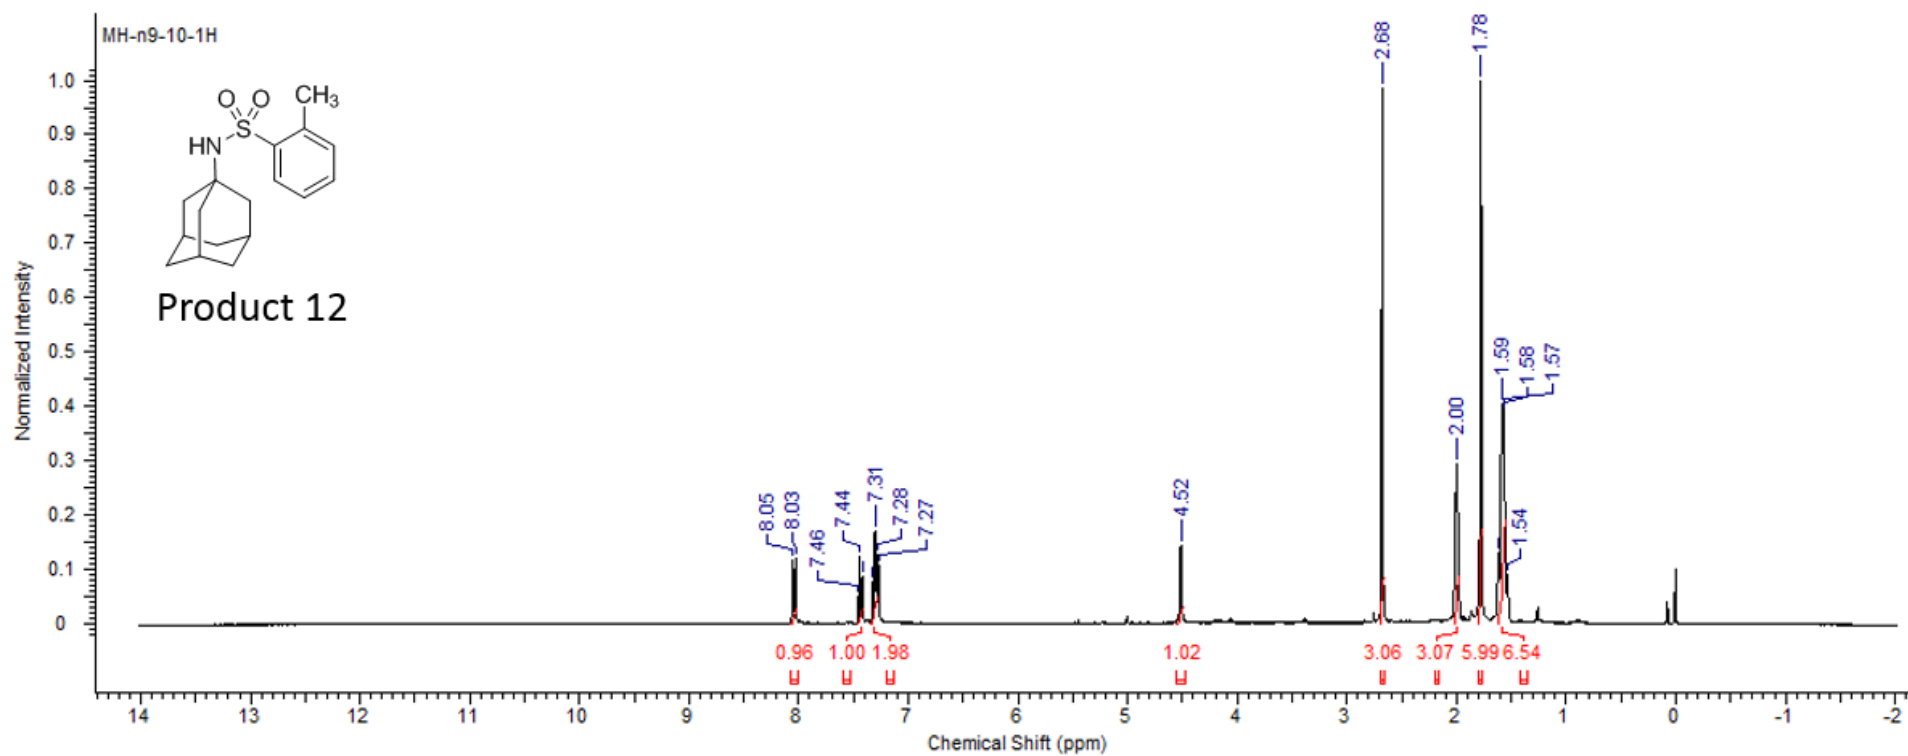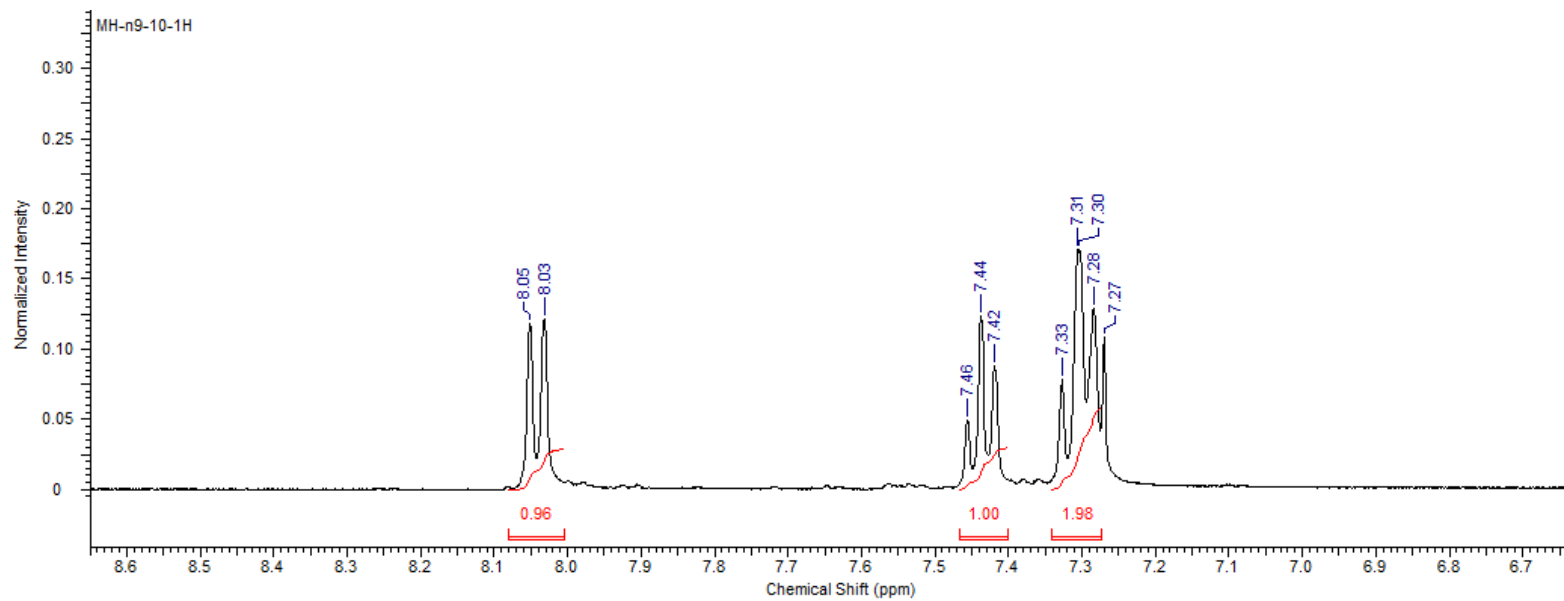

Figure S23.  $^1\text{H}$  NMR of Product 12.



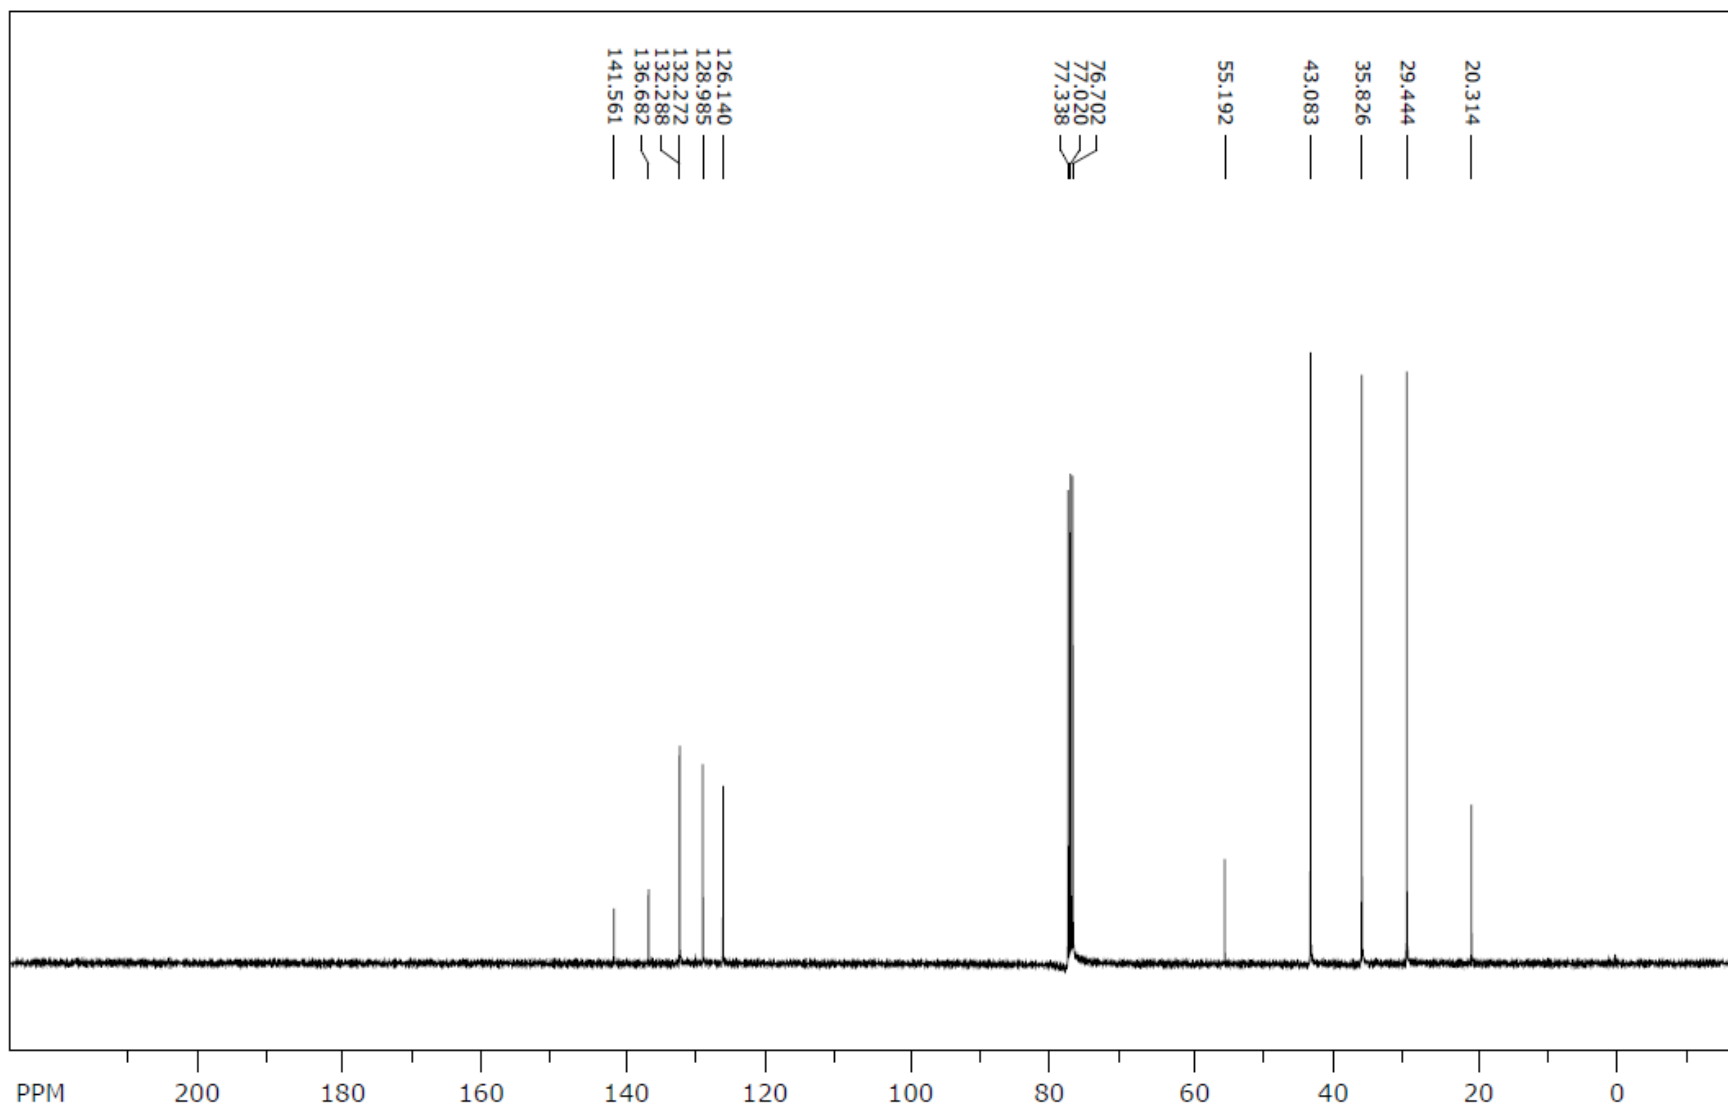

file: ...tane, 2-CH3Ph\MH-n9-10-13C.fid\fid block# 1 expt: "s2pul"  
 transmitter freq.: 100.511715 MHz  
 time domain size: 63750 points  
 width: 24509.80 Hz = 243.8502 ppm = 0.384468 Hz/pt  
 number of scans: 17000

freq. of 0 ppm: 100.501161 MHz  
 processed size: 65536 complex points  
 LB: 0.500 GF: 0.0000  
 Hz/cm: 980.392 ppm/cm: 9.75401

Figure S24. <sup>13</sup>C NMR of Product 12.

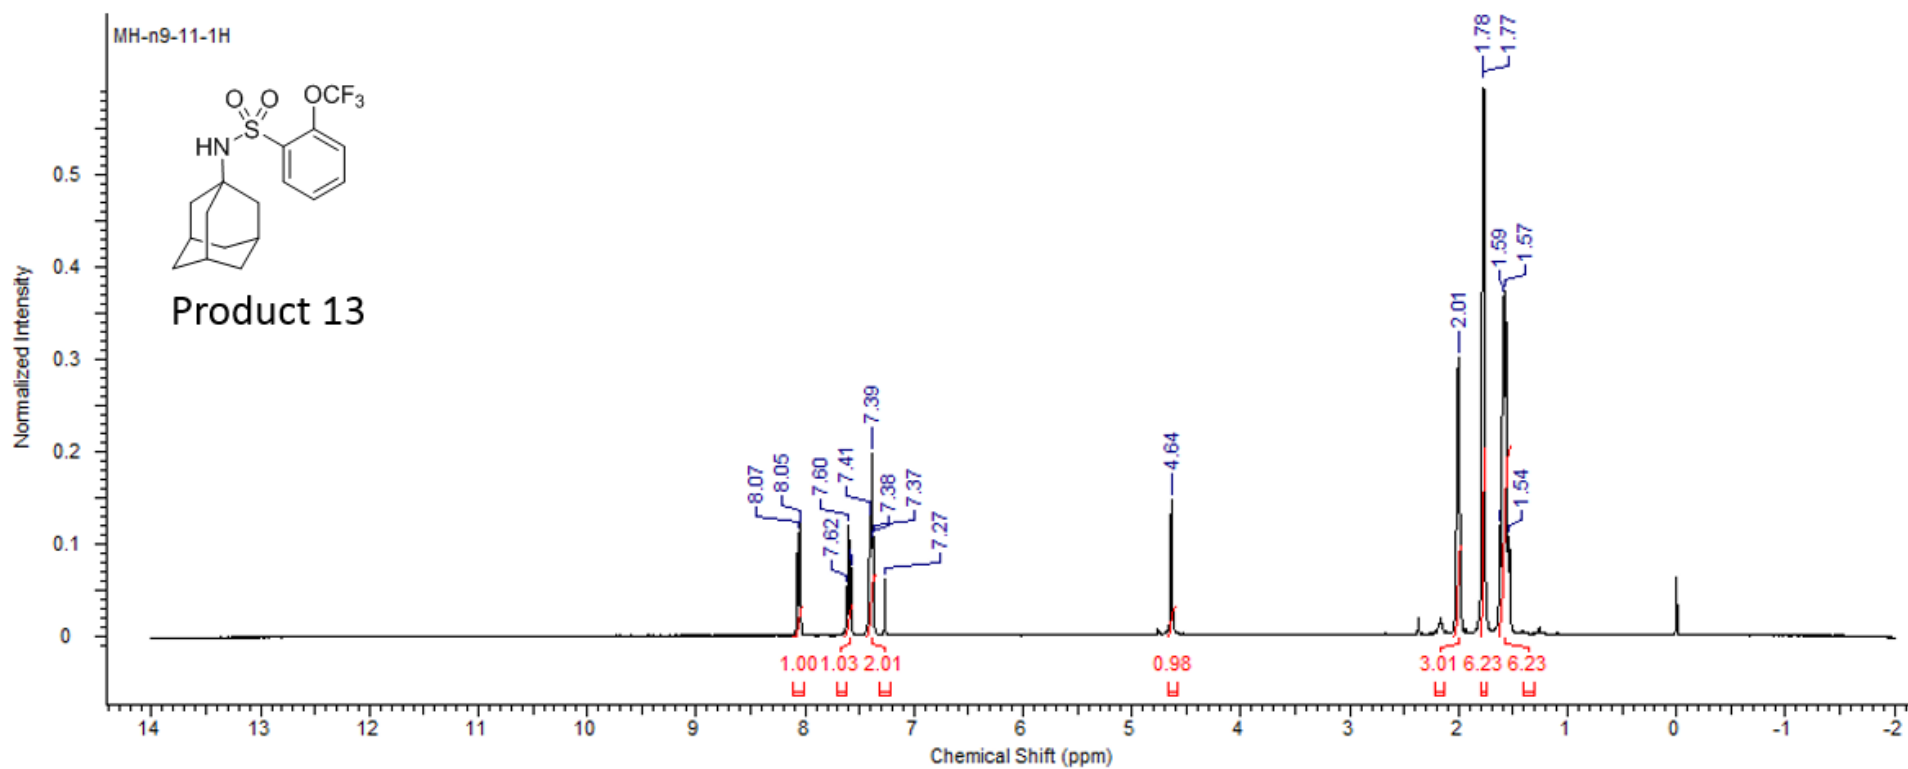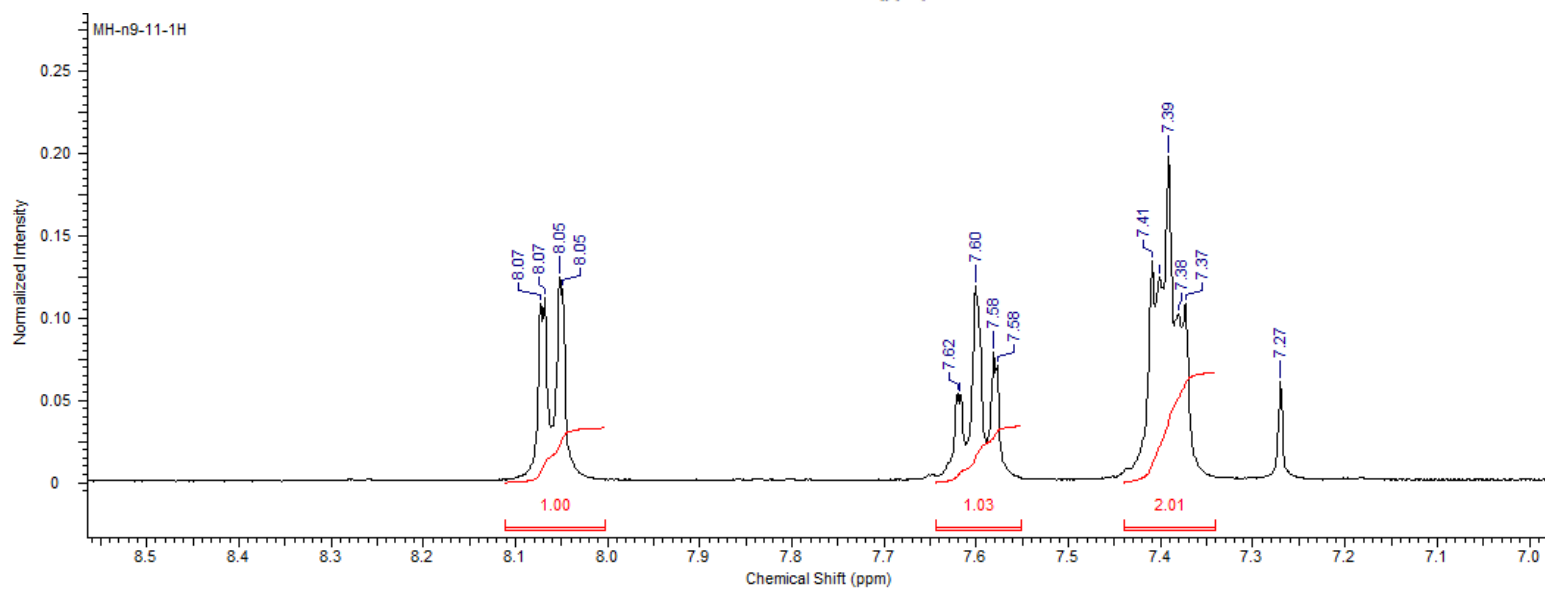

Figure S25.  $^1\text{H}$  NMR of Product 13.

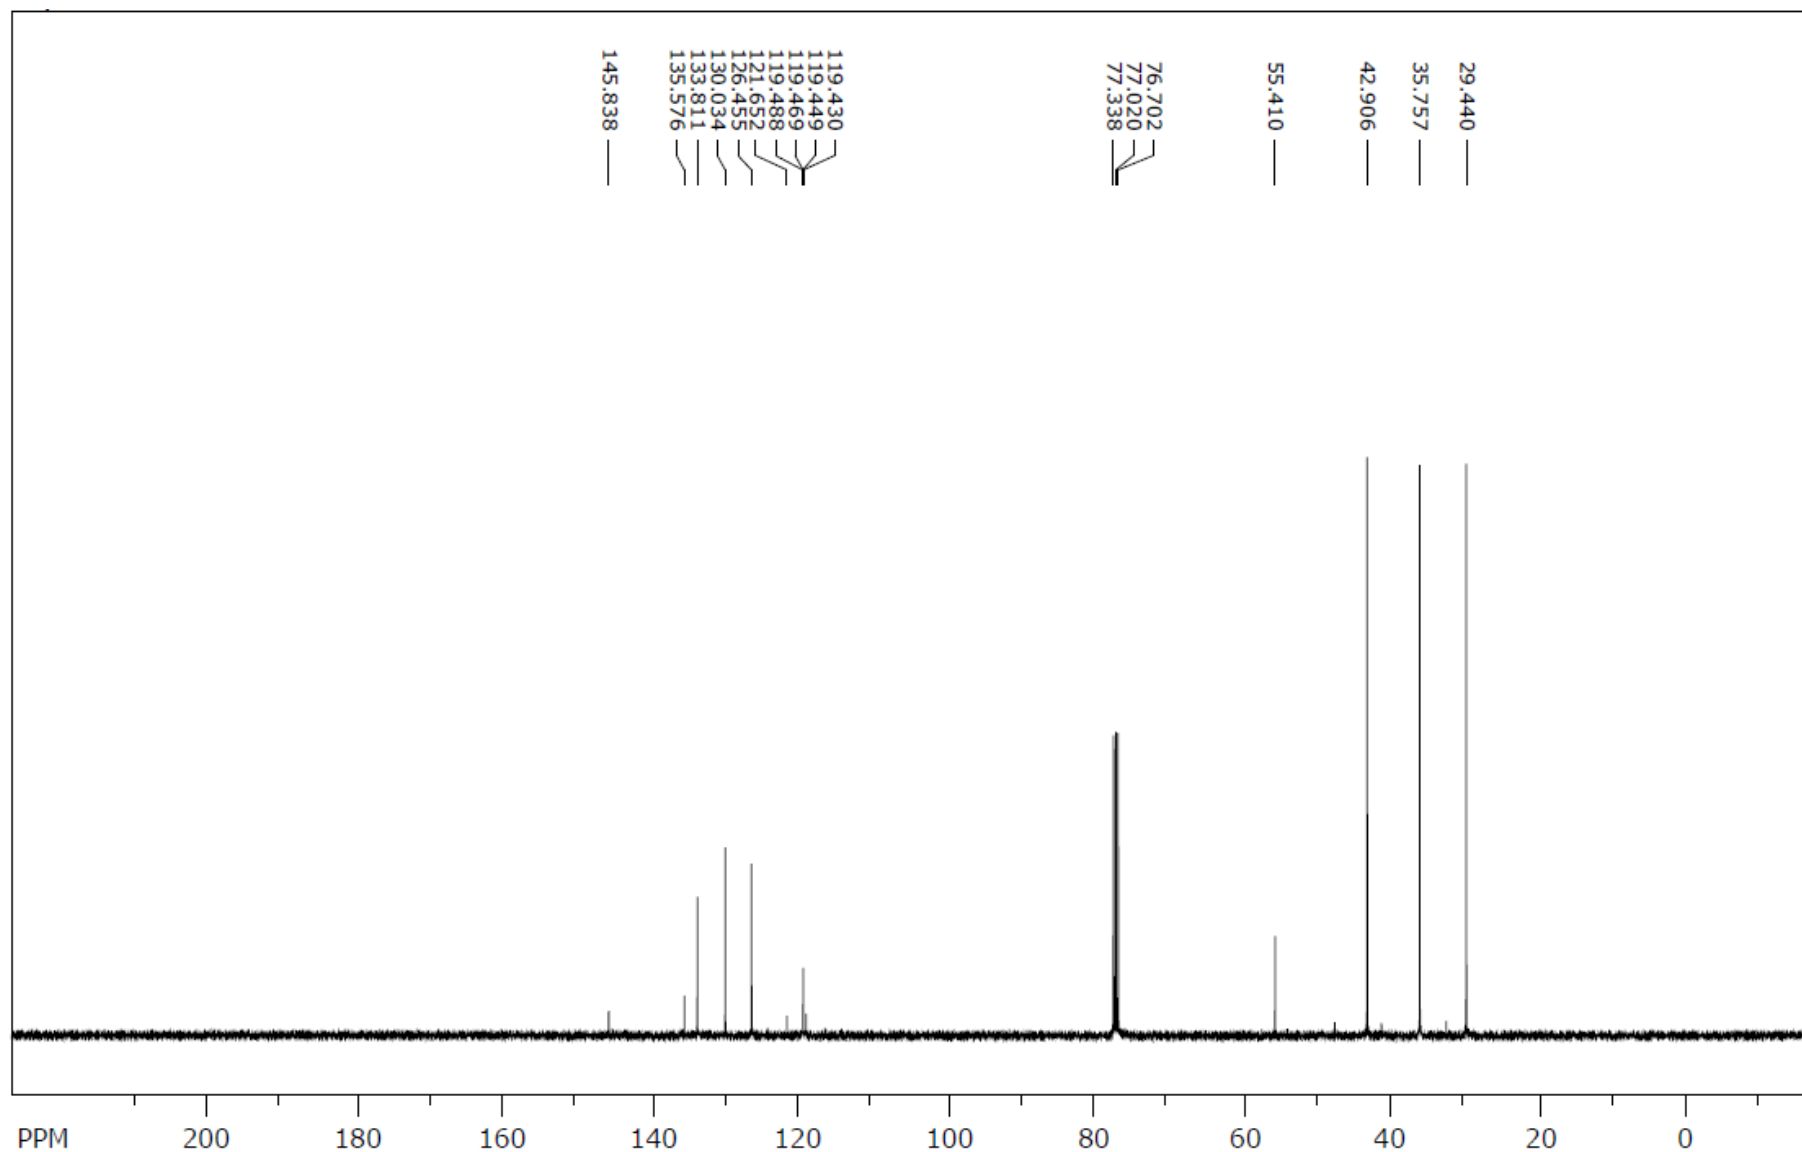

file: ...Data\NMR Fids\MH-n9-11-13C.fid\fid\_block# 1 expt: "s2pul"  
 transmitter freq.: 100.511715 MHz  
 time domain size: 63750 points  
 width: 24509.80 Hz = 243.8502 ppm = 0.384468 Hz/pt  
 number of scans: 1296

freq. of 0 ppm: 100.501161 MHz  
 processed size: 65536 complex points  
 LB: 0.500 GF: 0.0000  
 Hz/cm: 980.392 ppm/cm: 9.75401

Figure S26. <sup>13</sup>C NMR of Product 13.

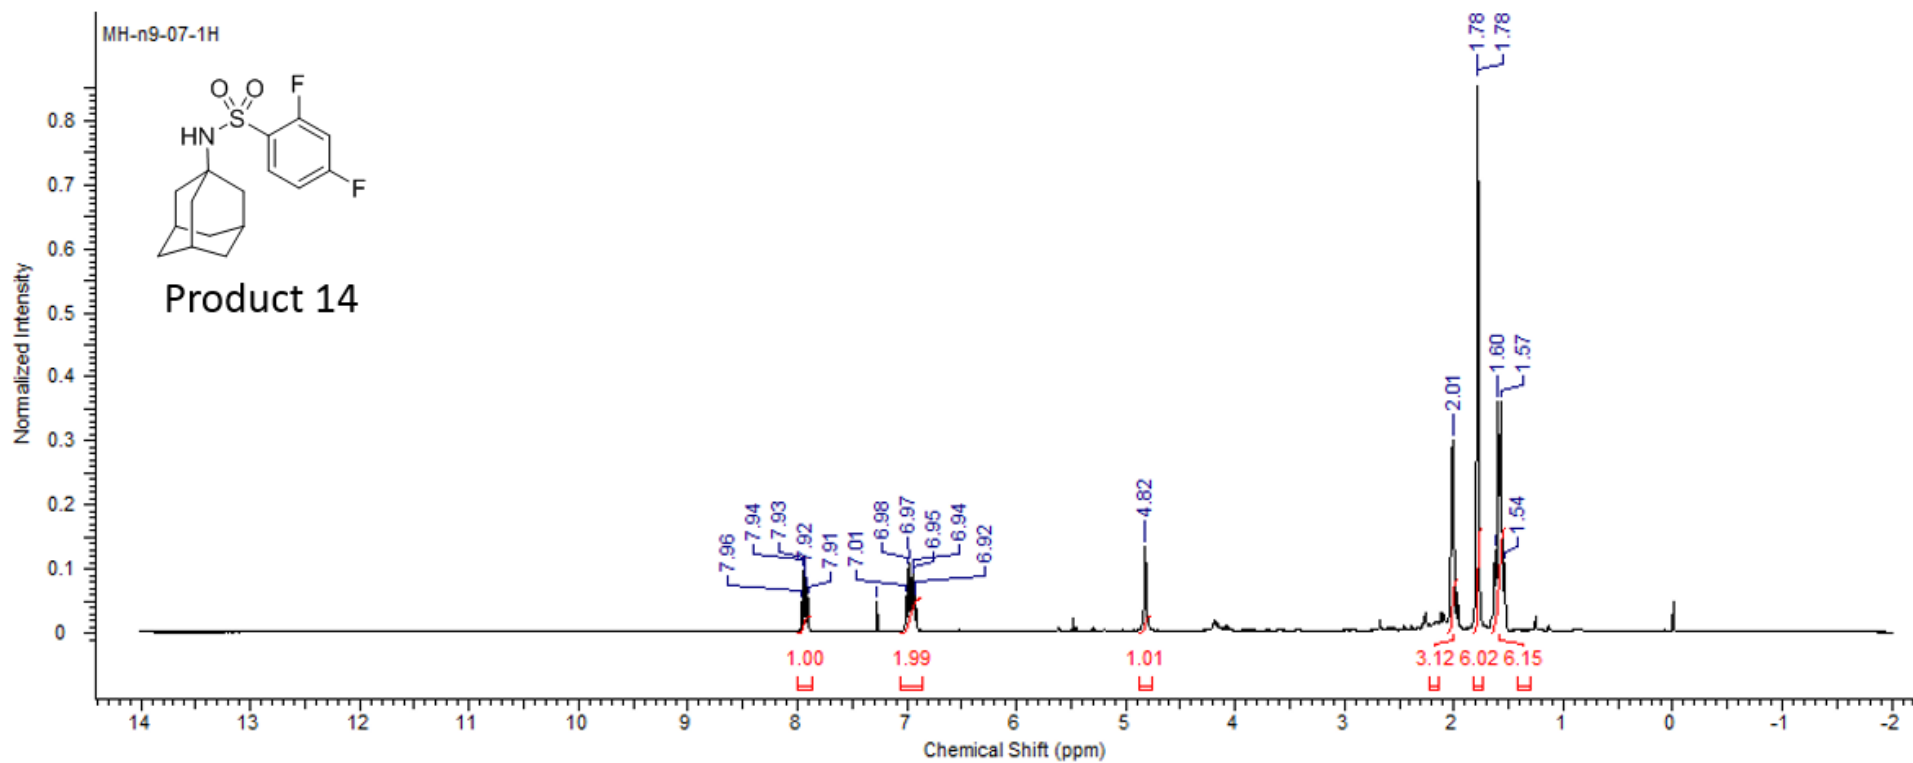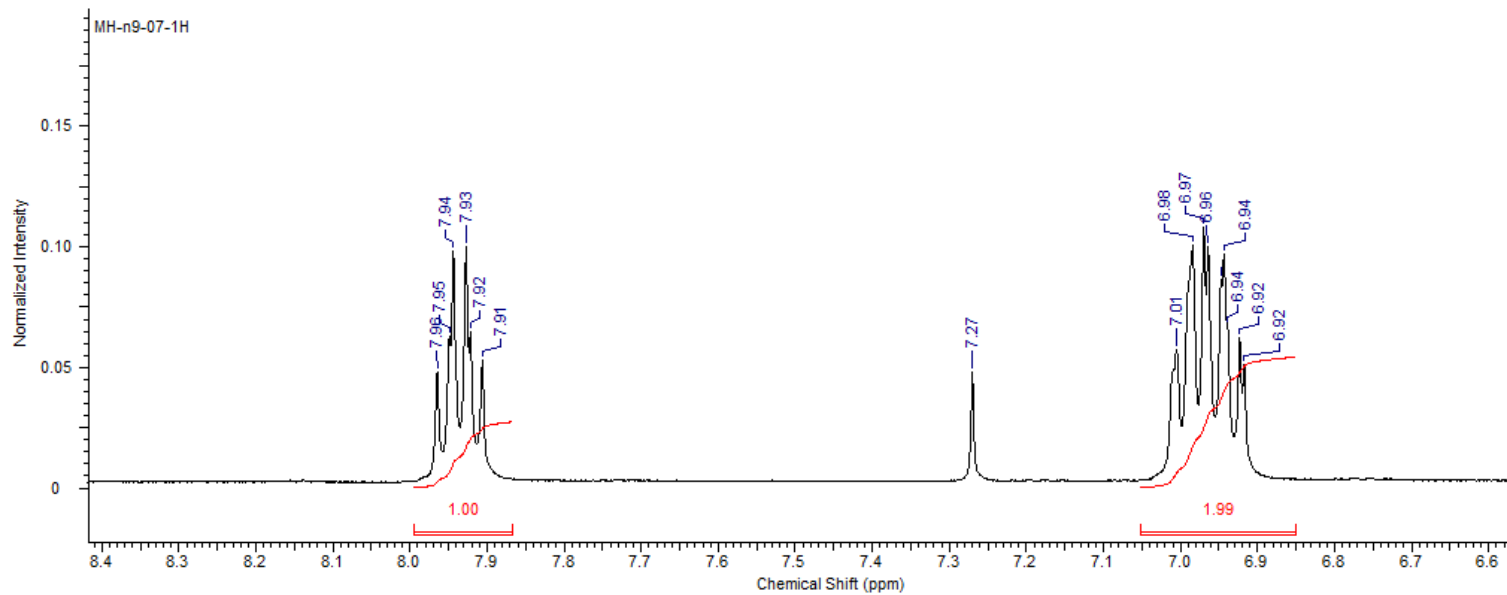

Figure S27.  $^1\text{H}$  NMR of Product 14.

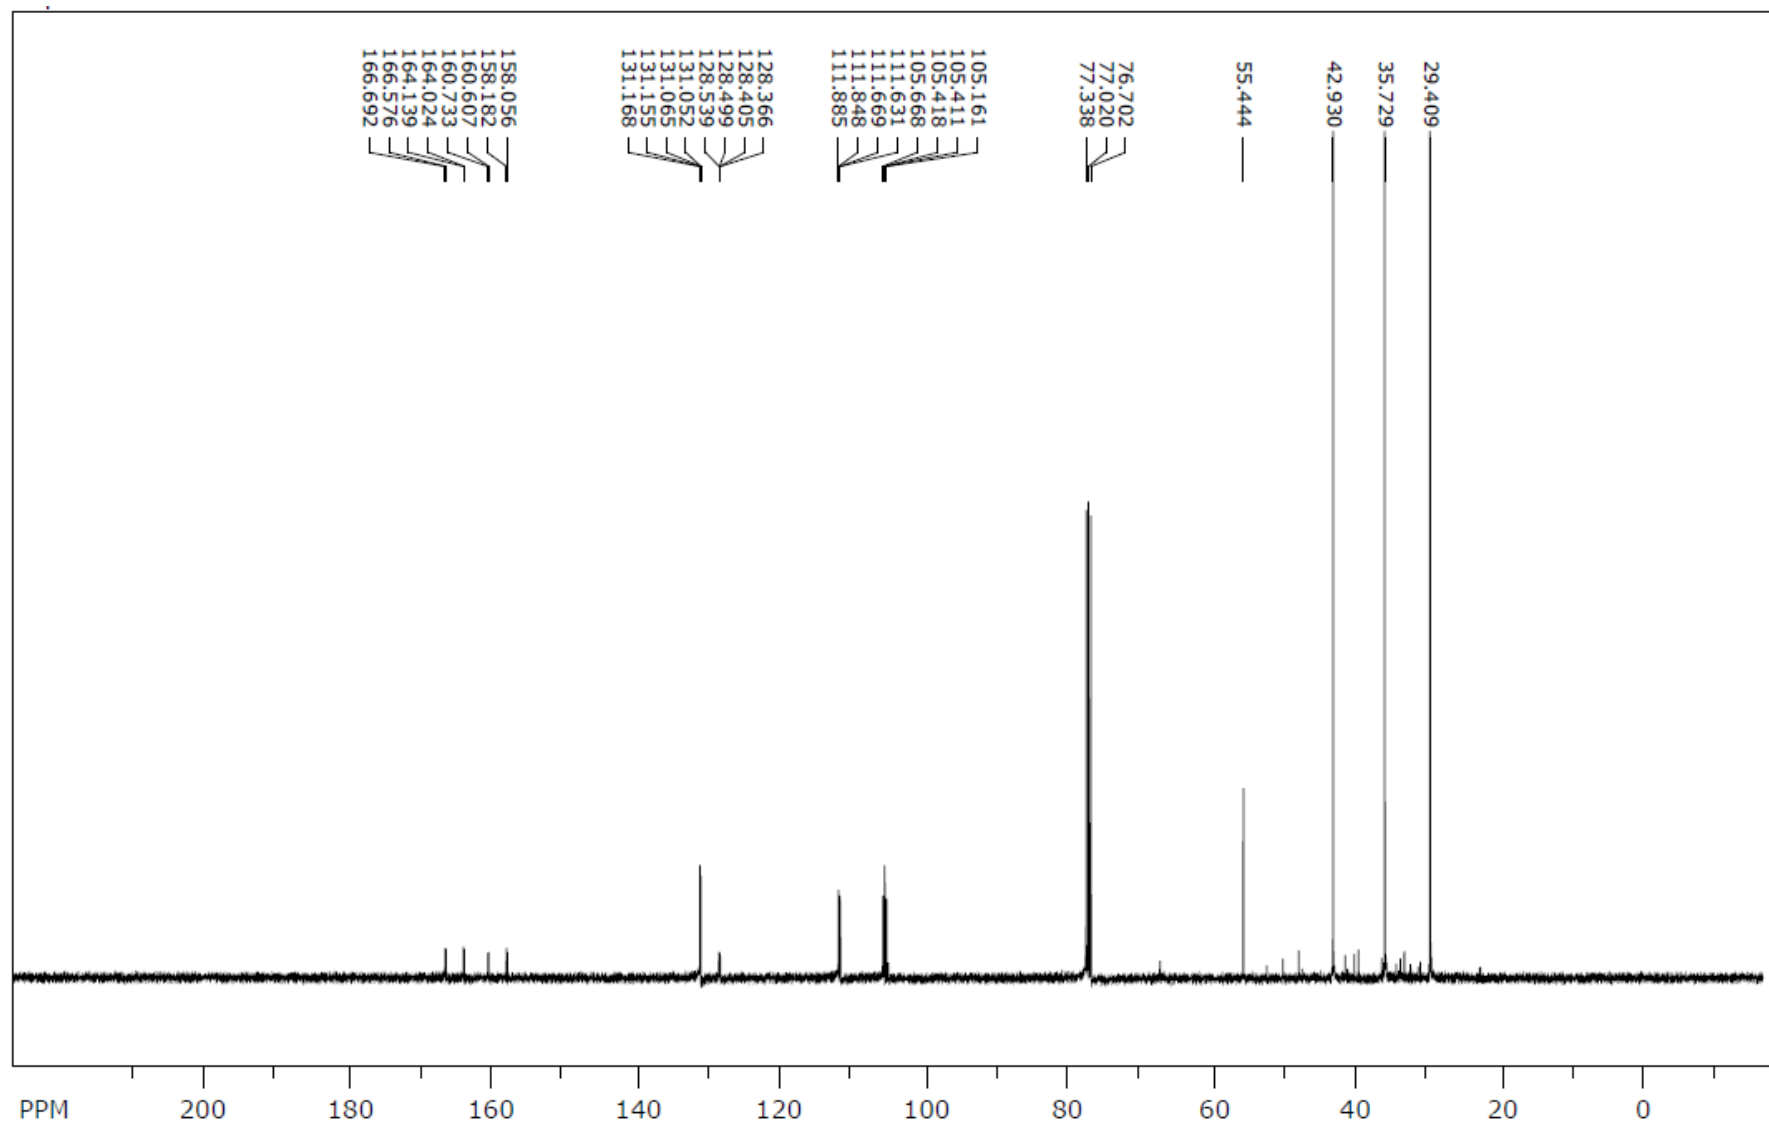

file: ...ne, 2,4-diFPh\MH-n9-07-13C.fid\fid block# 1 expt: "s2pul"  
 transmitter freq.: 100.511715 MHz  
 time domain size: 63750 points  
 width: 24509.80 Hz = 243.8502 ppm = 0.384468 Hz/pt  
 number of scans: 2448

freq. of 0 ppm: 100.501163 MHz  
 processed size: 65536 complex points  
 LB: 0.500 GF: 0.0000  
 Hz/cm: 980.392 ppm/cm: 9.75401

**Figure S28.**  $^{13}\text{C}$  NMR and  $^1\text{H}$  NMR of Product **14**.

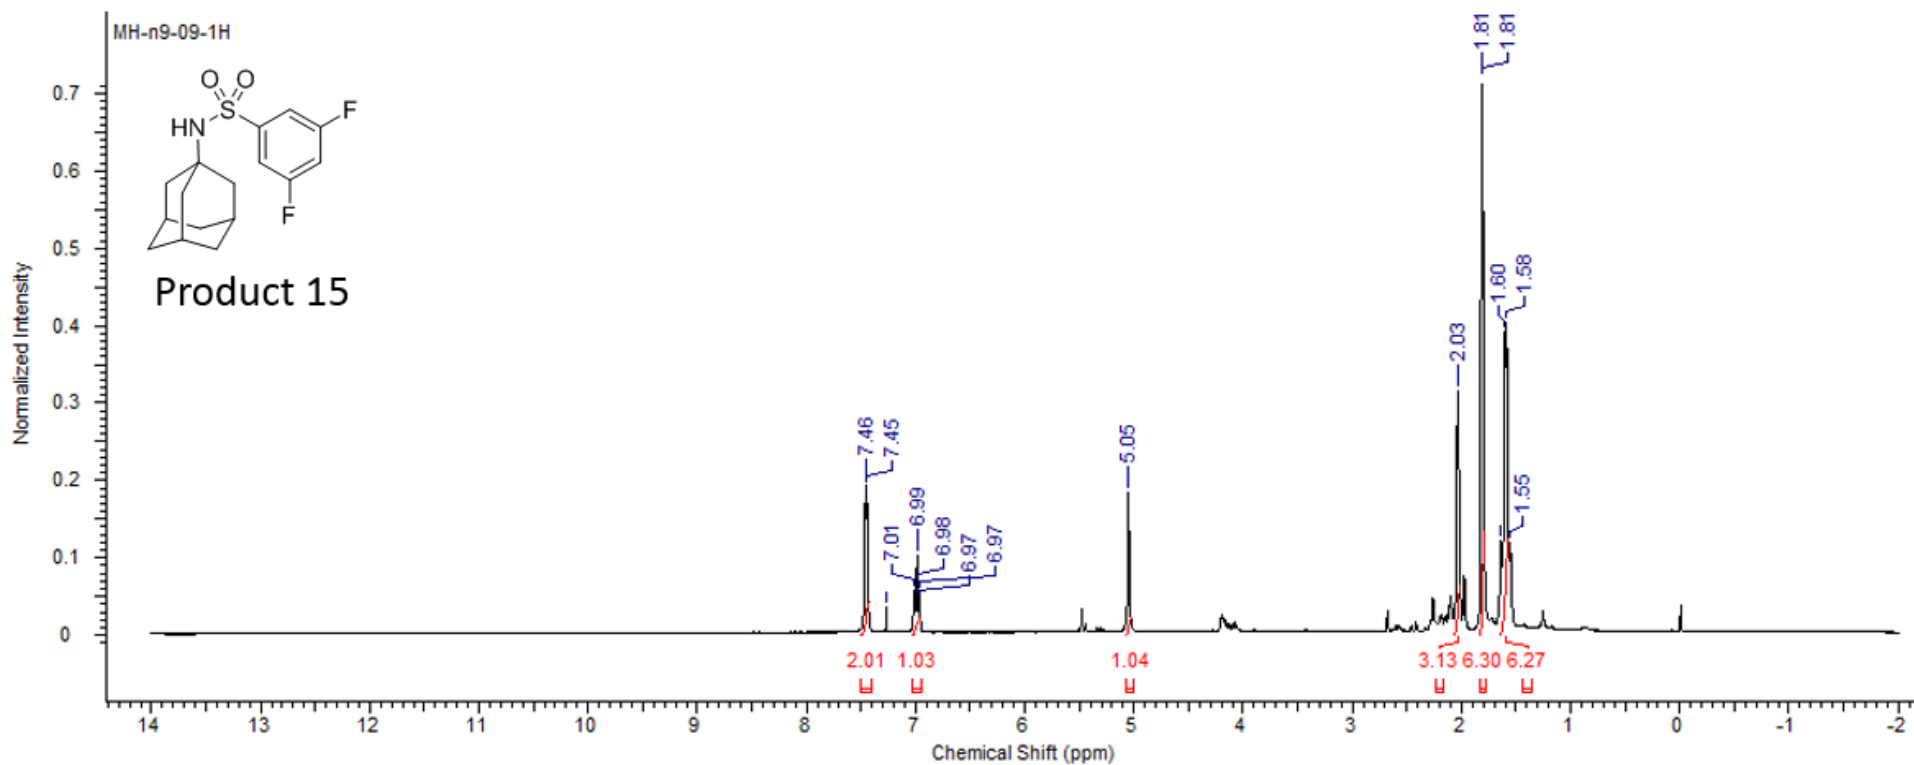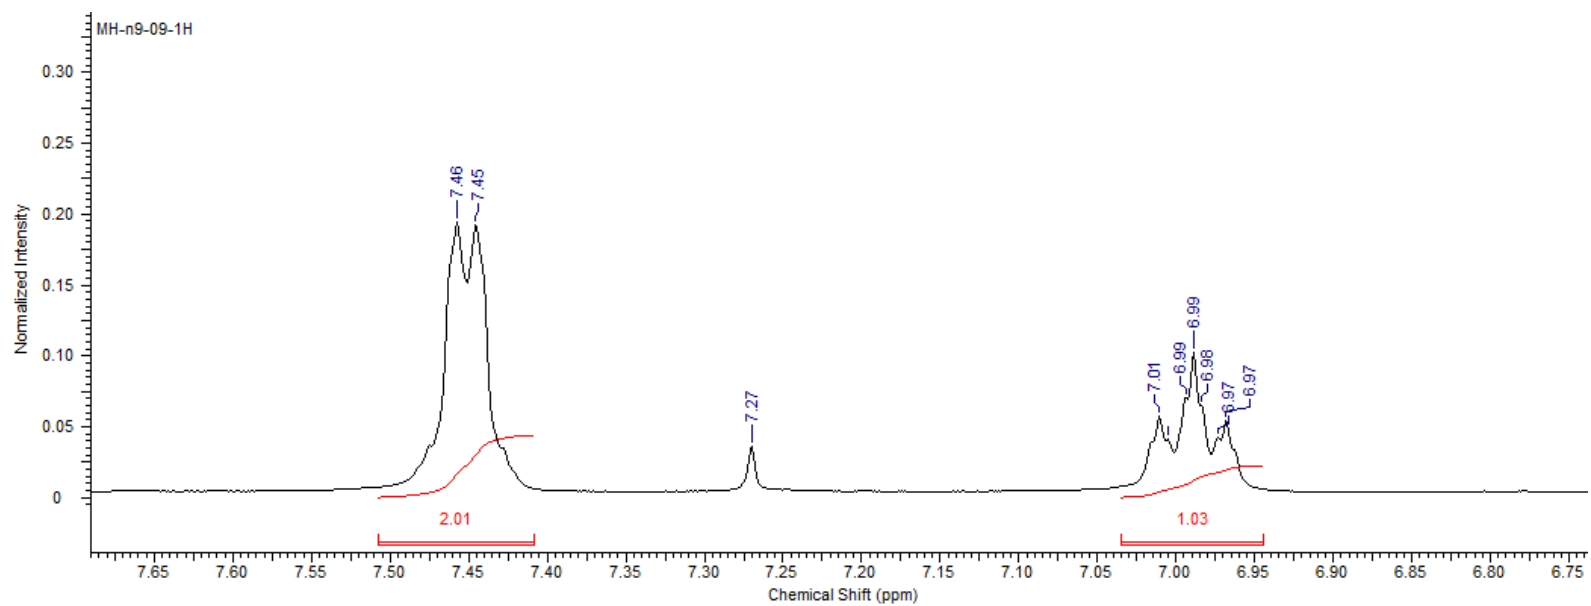

Figure S29. <sup>1</sup>H NMR of Product 15.

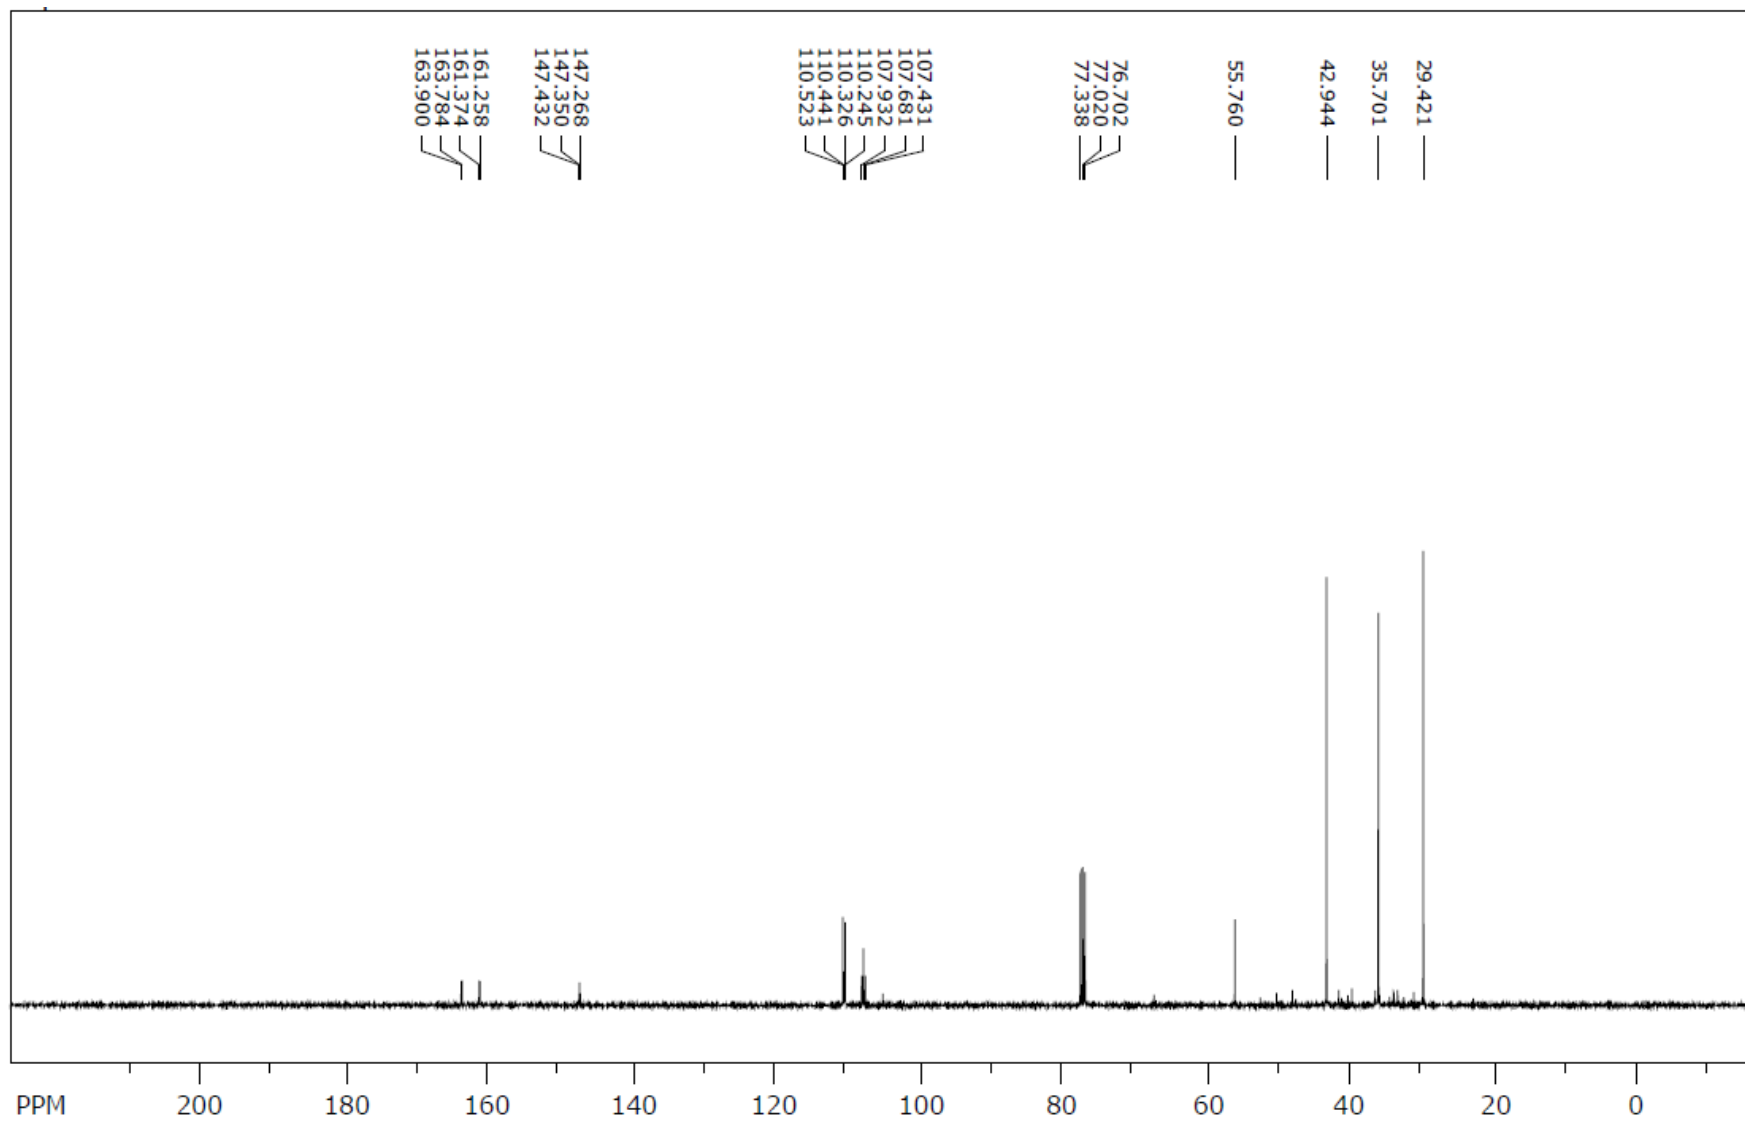

file: ...Data\NMR Fids\MH-n9-09-13C.fid\fid\_block# 1 expt: "s2pul"  
 transmitter freq.: 100.511715 MHz  
 time domain size: 63750 points  
 width: 24509.80 Hz = 243.8502 ppm = 0.384468 Hz/pt  
 number of scans: 1360

freq. of 0 ppm: 100.501163 MHz  
 processed size: 65536 complex points  
 LB: 0.500 GF: 0.0000  
 Hz/cm: 980.392 ppm/cm: 9.75401

Figure S30. <sup>13</sup>C NMR of Product 15.

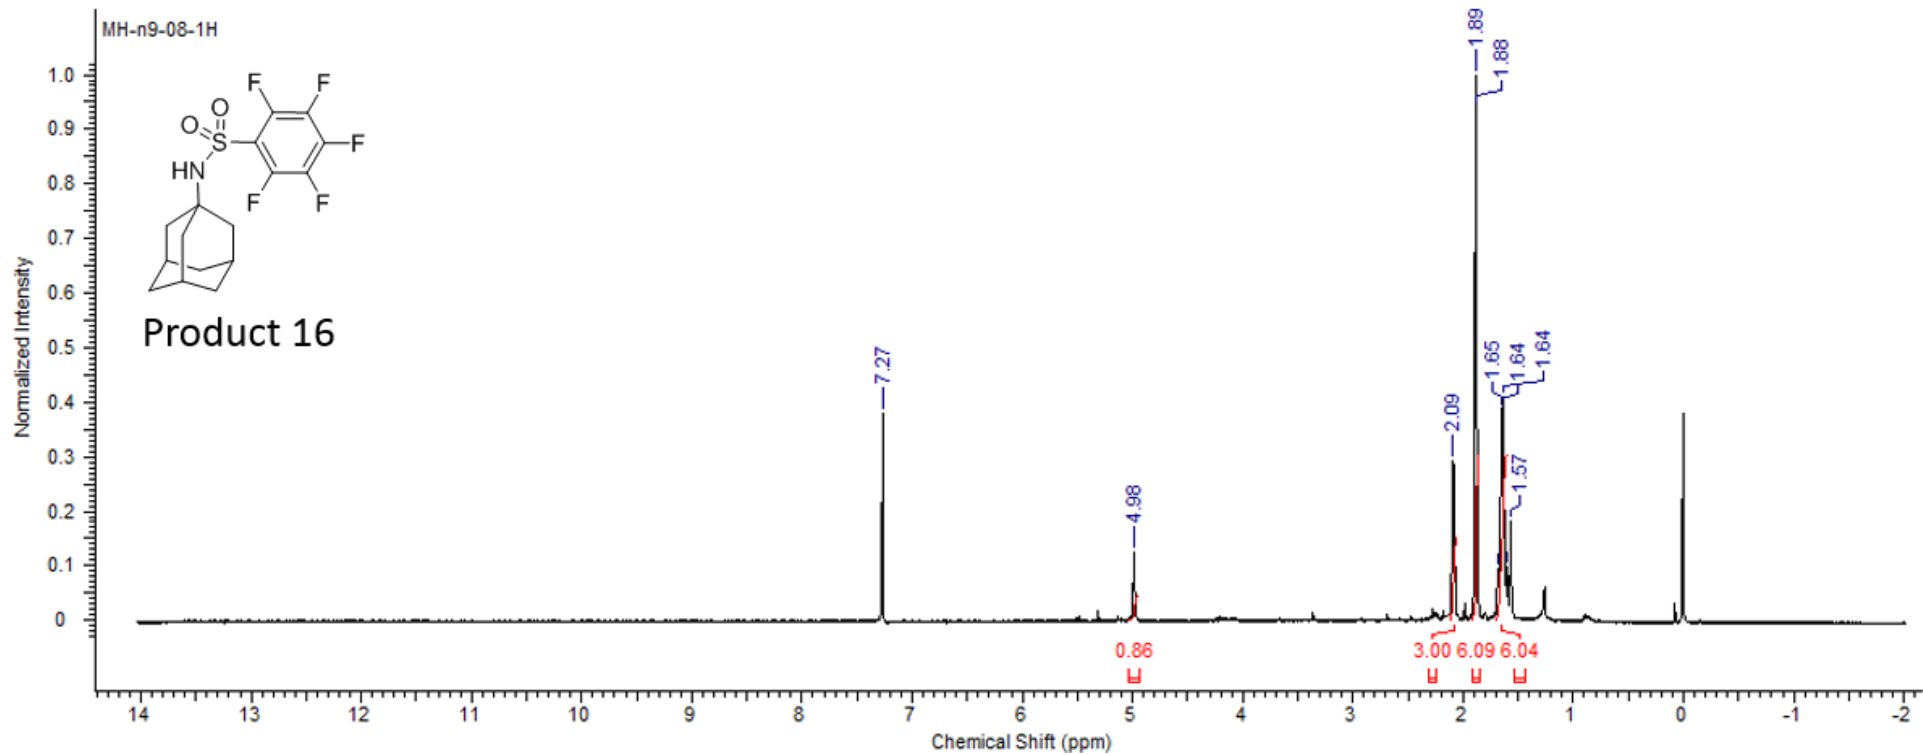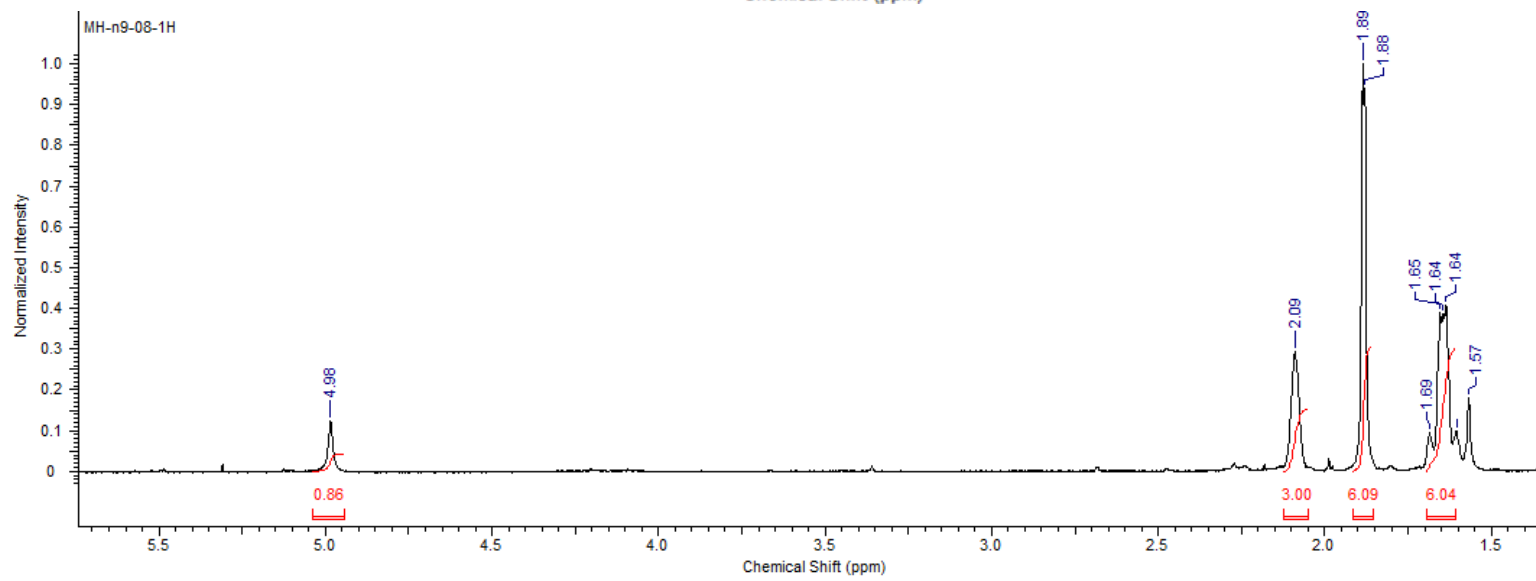

Figure S31.  $^1\text{H}$  NMR of Product 16.



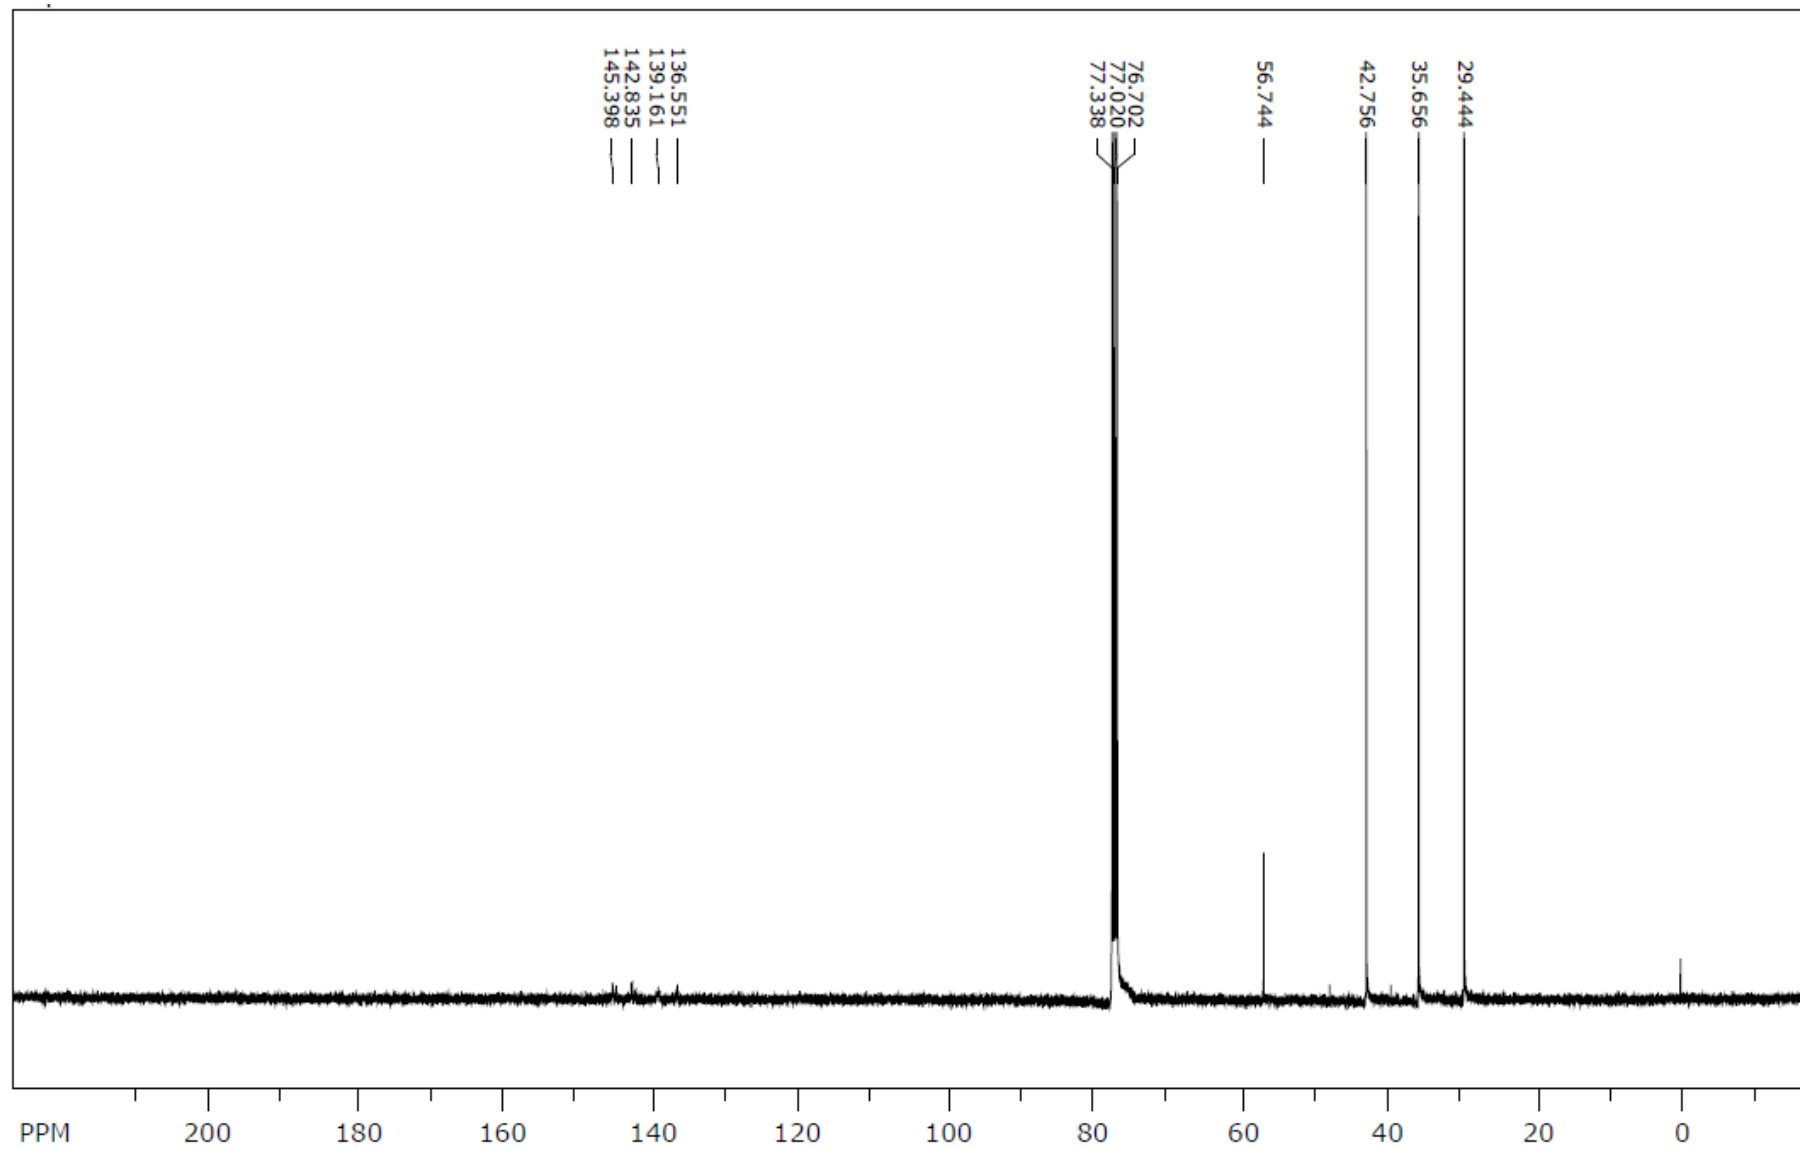

file: ...,5,6-pentaFPh\MH-n9-08-13C.fid\fid block# 1 expt: "s2pul"  
transmitter freq.: 100.511715 MHz  
time domain size: 63750 points  
width: 24509.80 Hz = 243.8502 ppm = 0.384468 Hz/pt  
number of scans: 18000

freq. of 0 ppm: 100.501160 MHz  
processed size: 65536 complex points  
LB: 0.500 GF: 0.0000  
Hz/cm: 980.392 ppm/cm: 9.75401

Figure S32. <sup>13</sup>C NMR of Product 16.

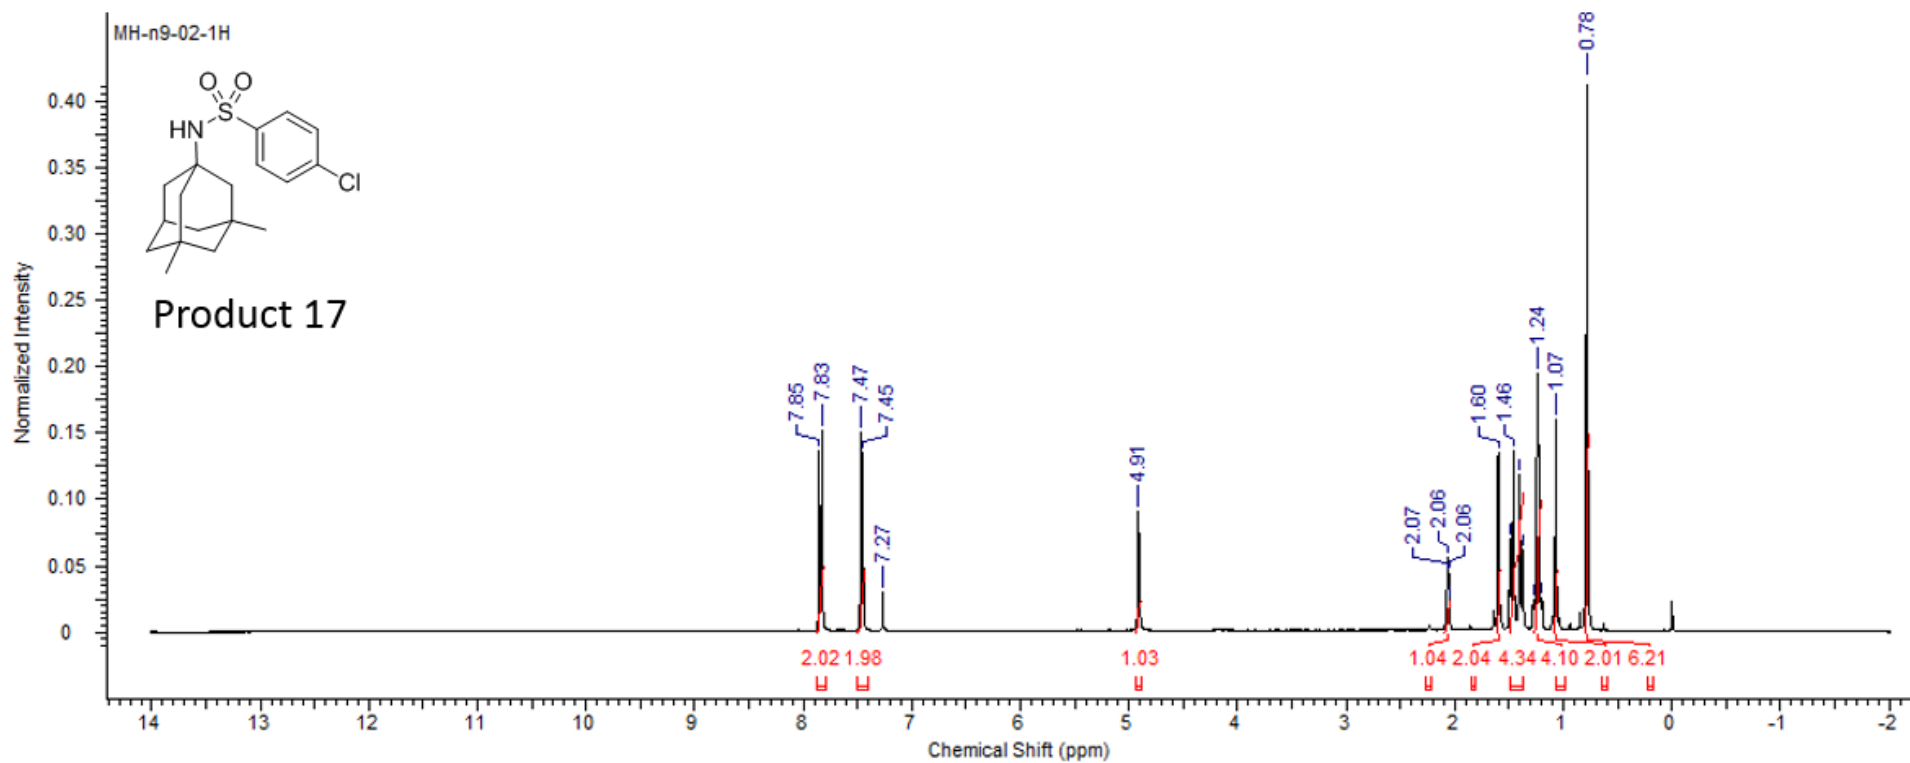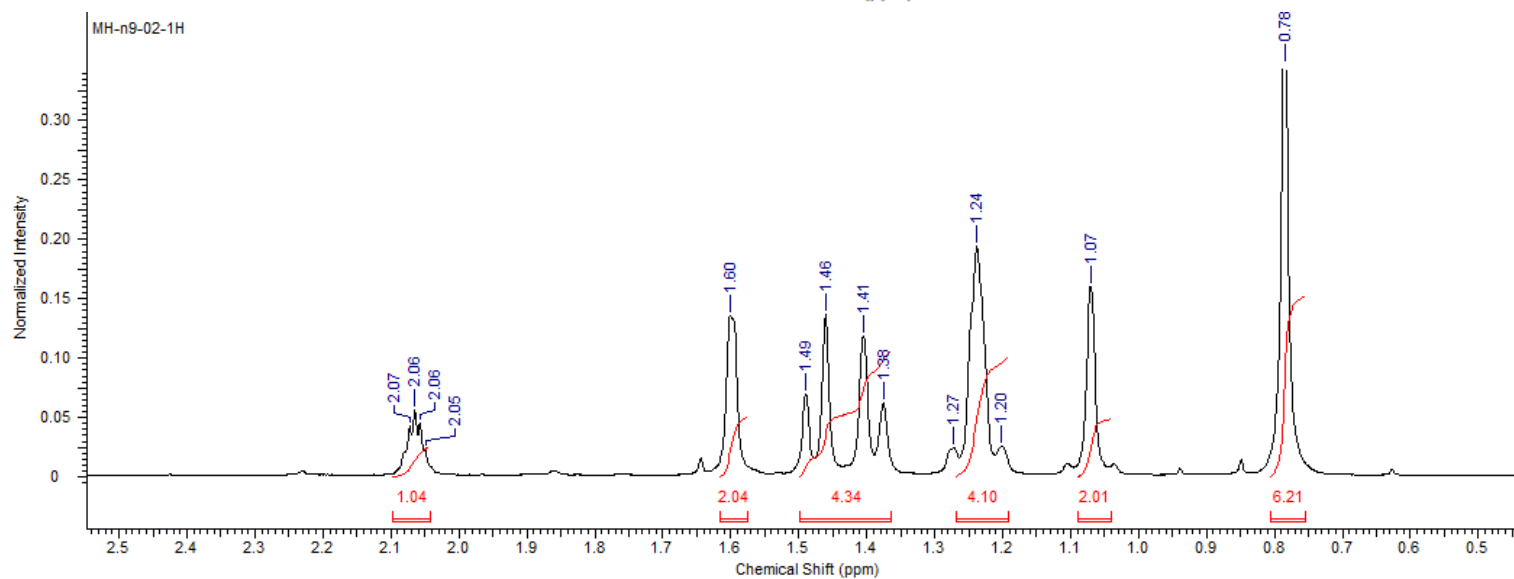

Figure S33.  $^1\text{H}$  NMR of Product 17.

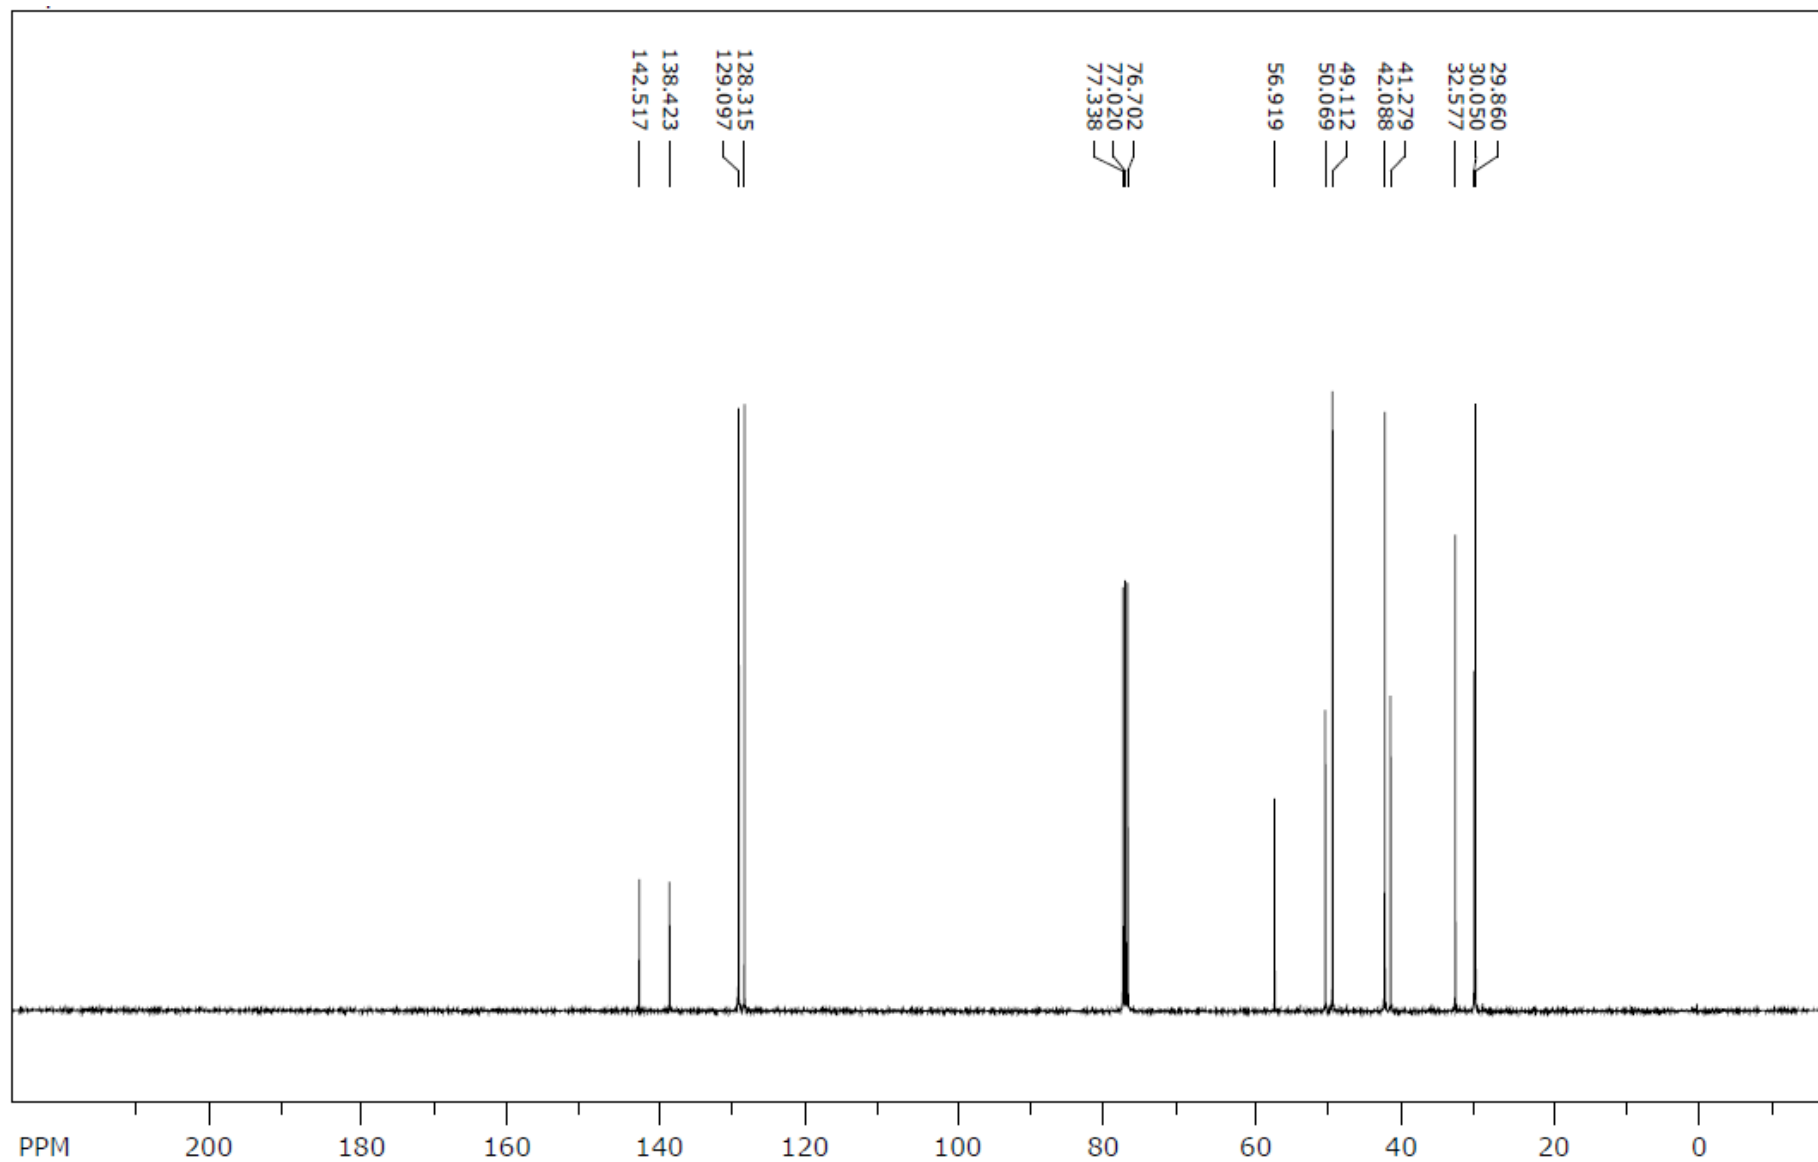

file: ...ntane, 4-ClPh\MH-n9-02-13C.fid\fid\_block# 1\_expt: "s2pul"  
 transmitter freq.: 100.511715 MHz  
 time domain size: 63750 points  
 width: 24509.80 Hz = 243.8502 ppm = 0.384468 Hz/pt  
 number of scans: 15000

freq. of 0 ppm: 100.501162 MHz  
 processed size: 65536 complex points  
 LB: 0.500 GF: 0.0000  
 Hz/cm: 980.392 ppm/cm: 9.75401

Figure S34. <sup>13</sup>C NMR of Product 17.

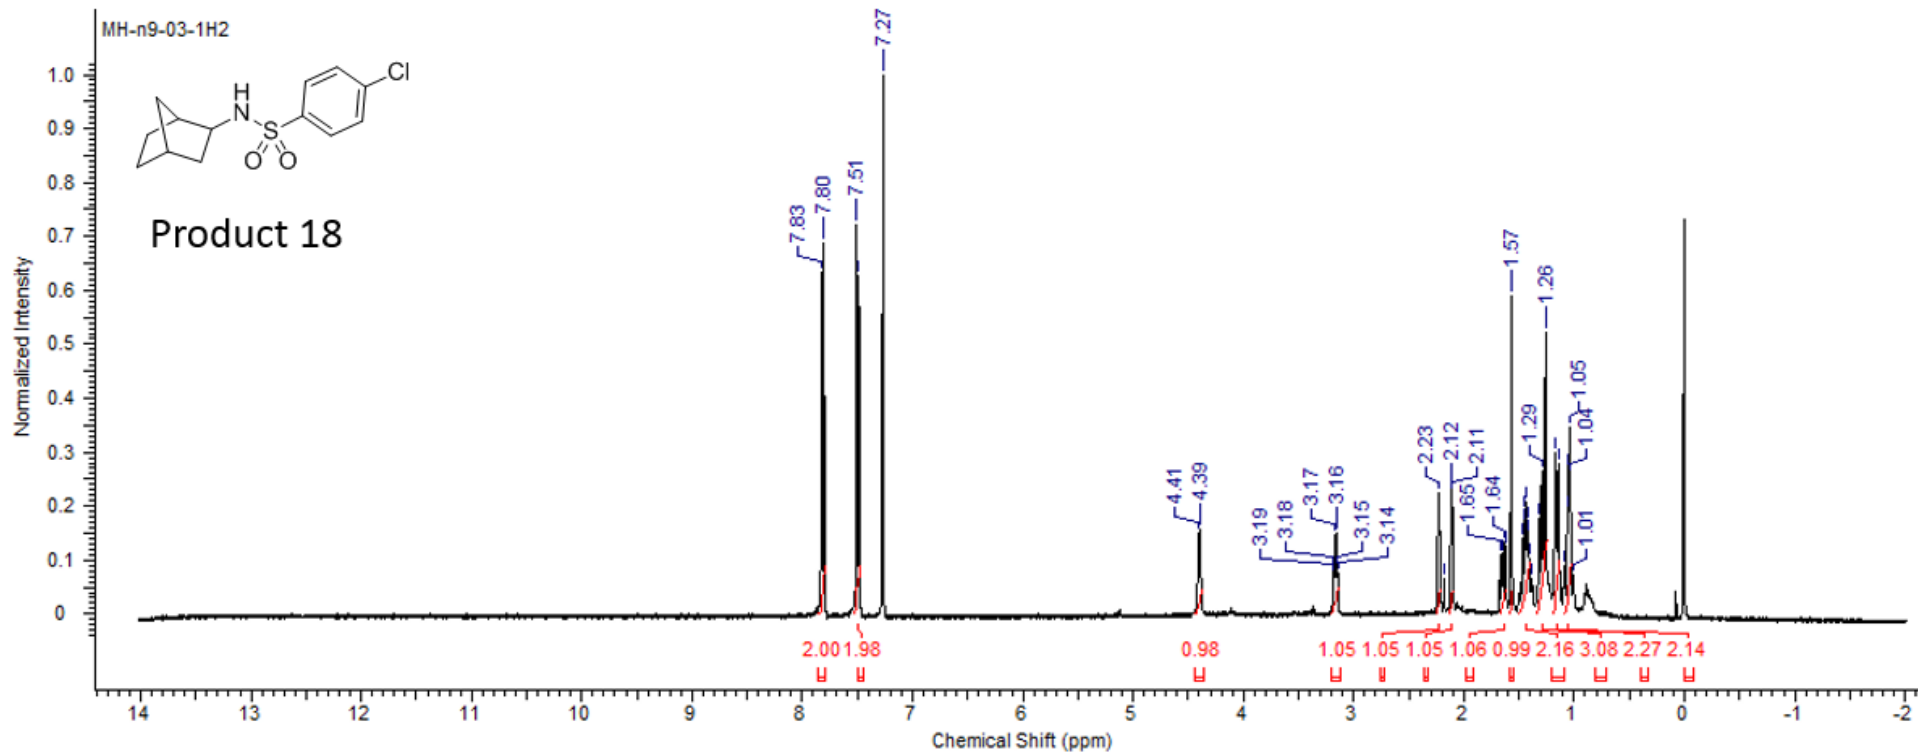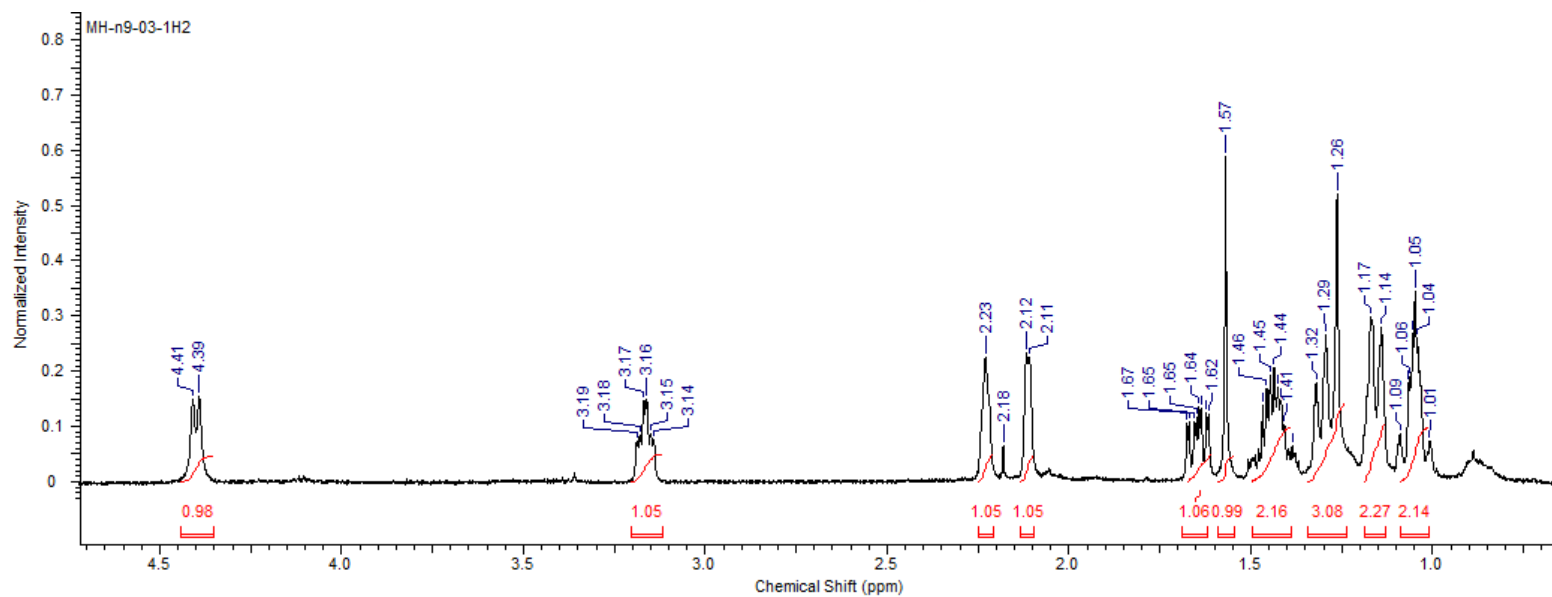

Figure S35.  $^1\text{H}$  NMR of Product 18.

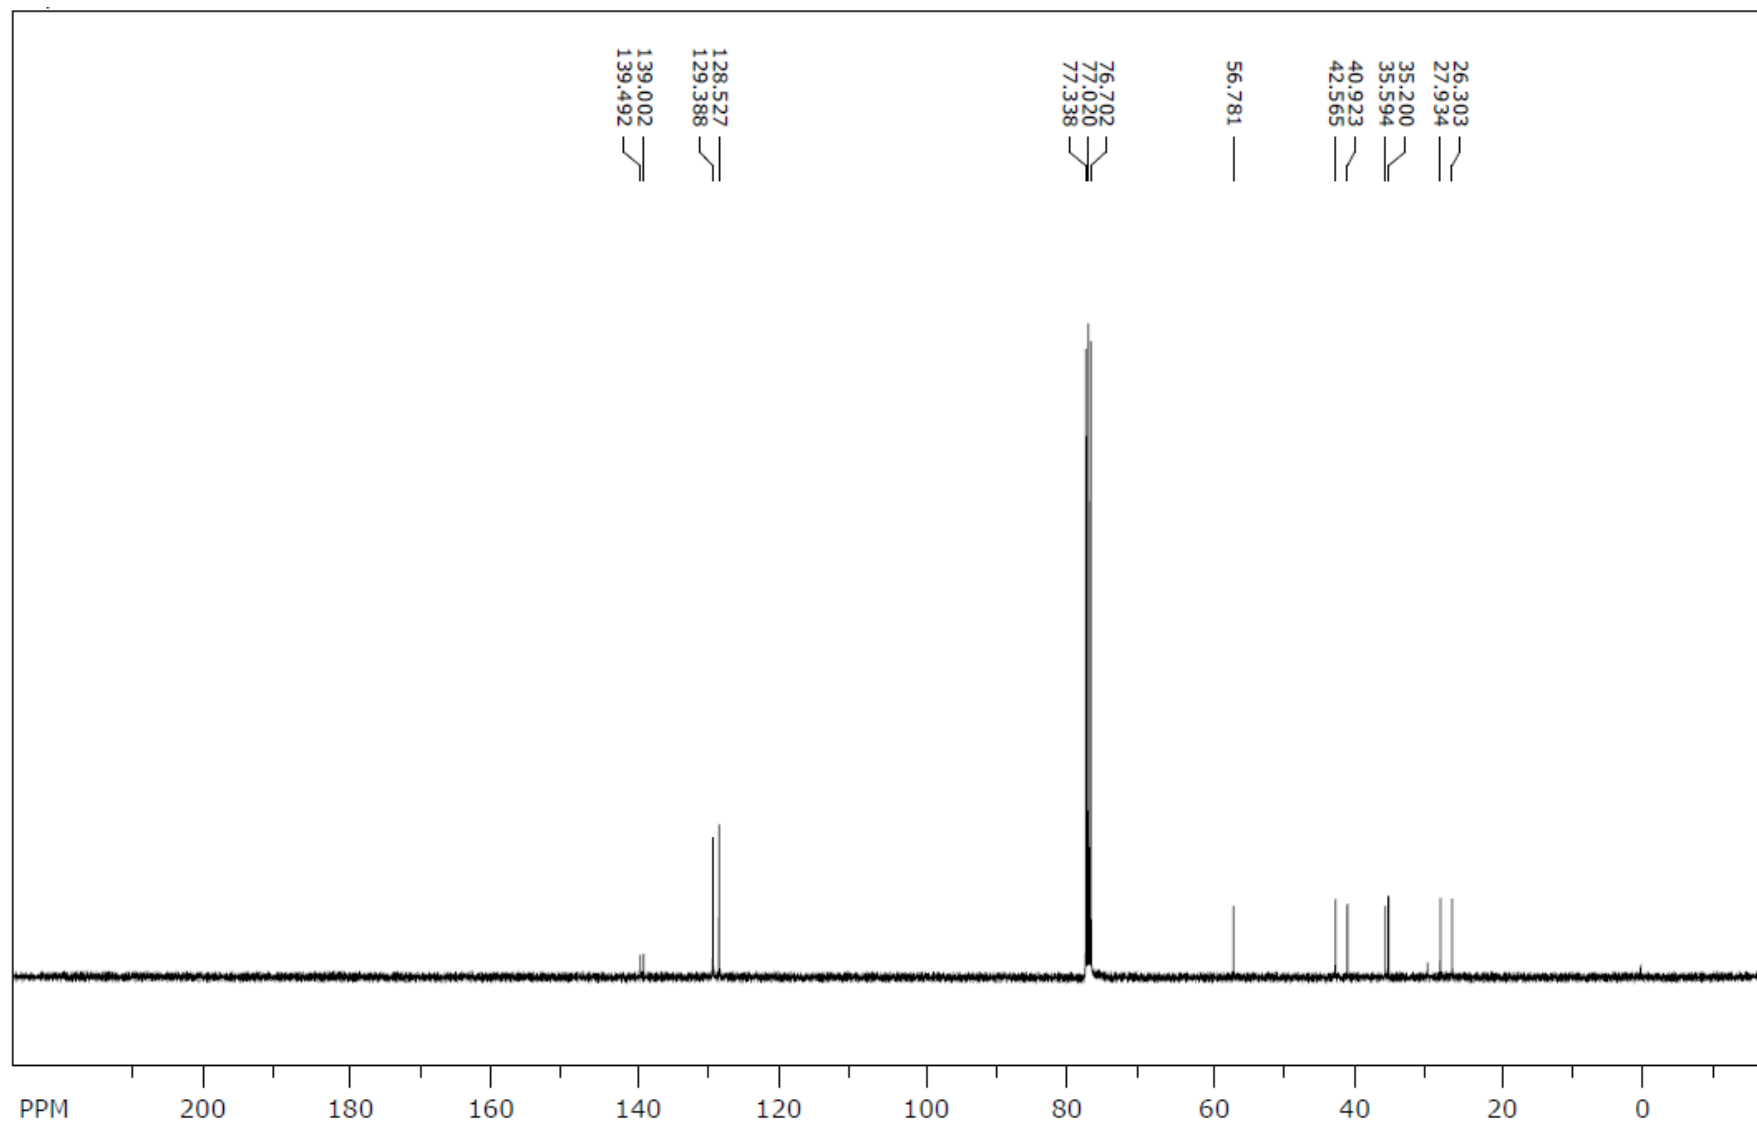

file: ...nane, 4-ClPh\MH-n9-03-13C2.fid\fid\_block# 1 expt: "s2pul"  
 transmitter freq.: 100.511715 MHz  
 time domain size: 63750 points  
 width: 24509.80 Hz = 243.8502 ppm = 0.384468 Hz/pt  
 number of scans: 18000

freq. of 0 ppm: 100.501160 MHz  
 processed size: 65536 complex points  
 LB: 0.500 GF: 0.0000  
 Hz/cm: 980.392 ppm/cm: 9.75401

Figure S36. <sup>13</sup>C NMR of Product 18.

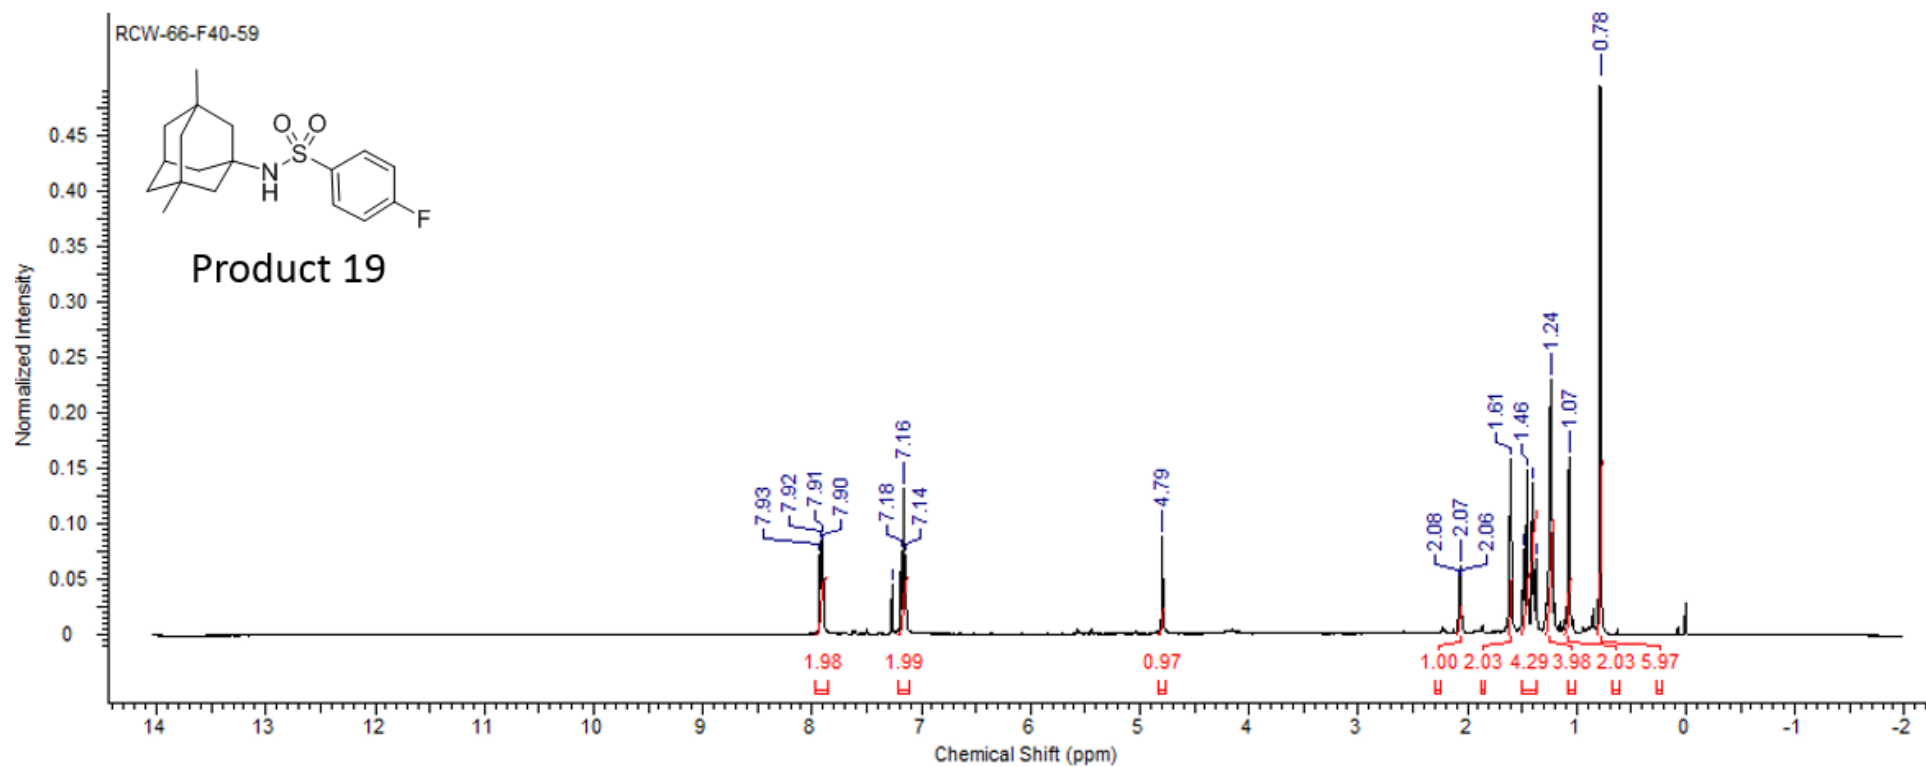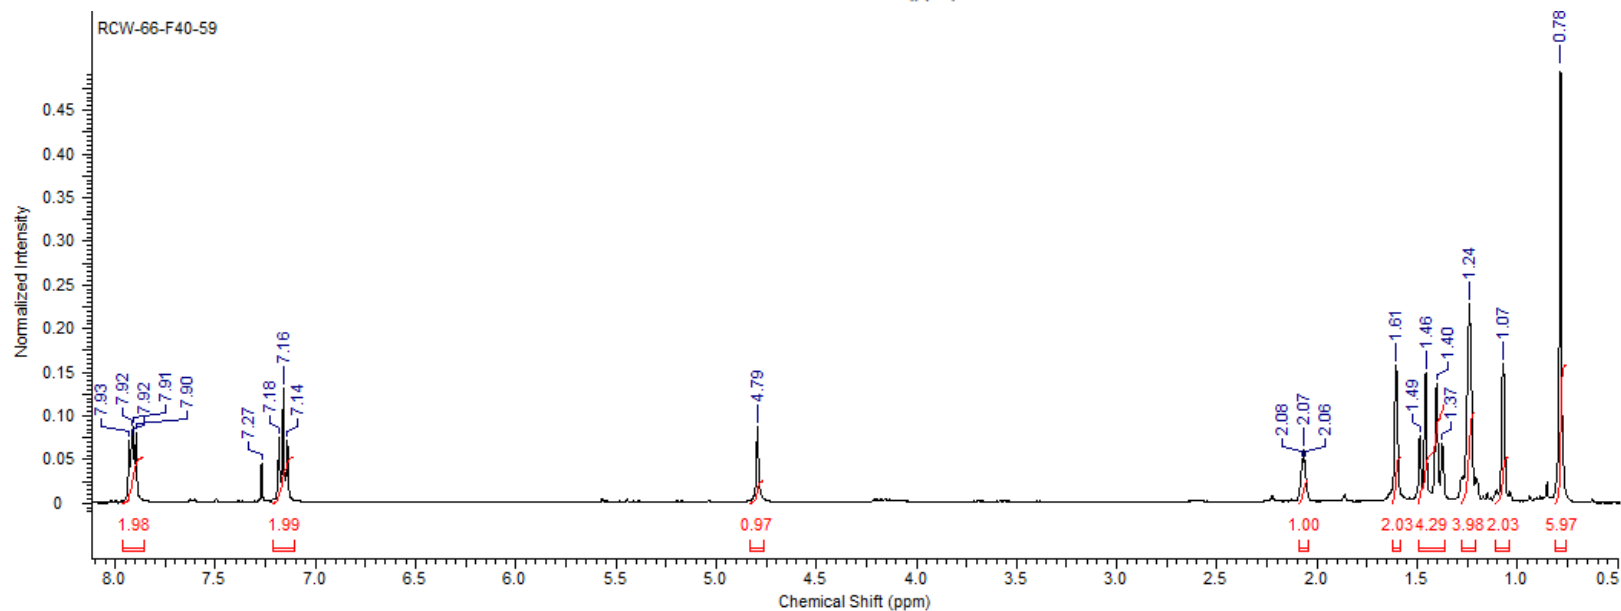

Figure S37.  $^1\text{H}$  NMR of Product 19.

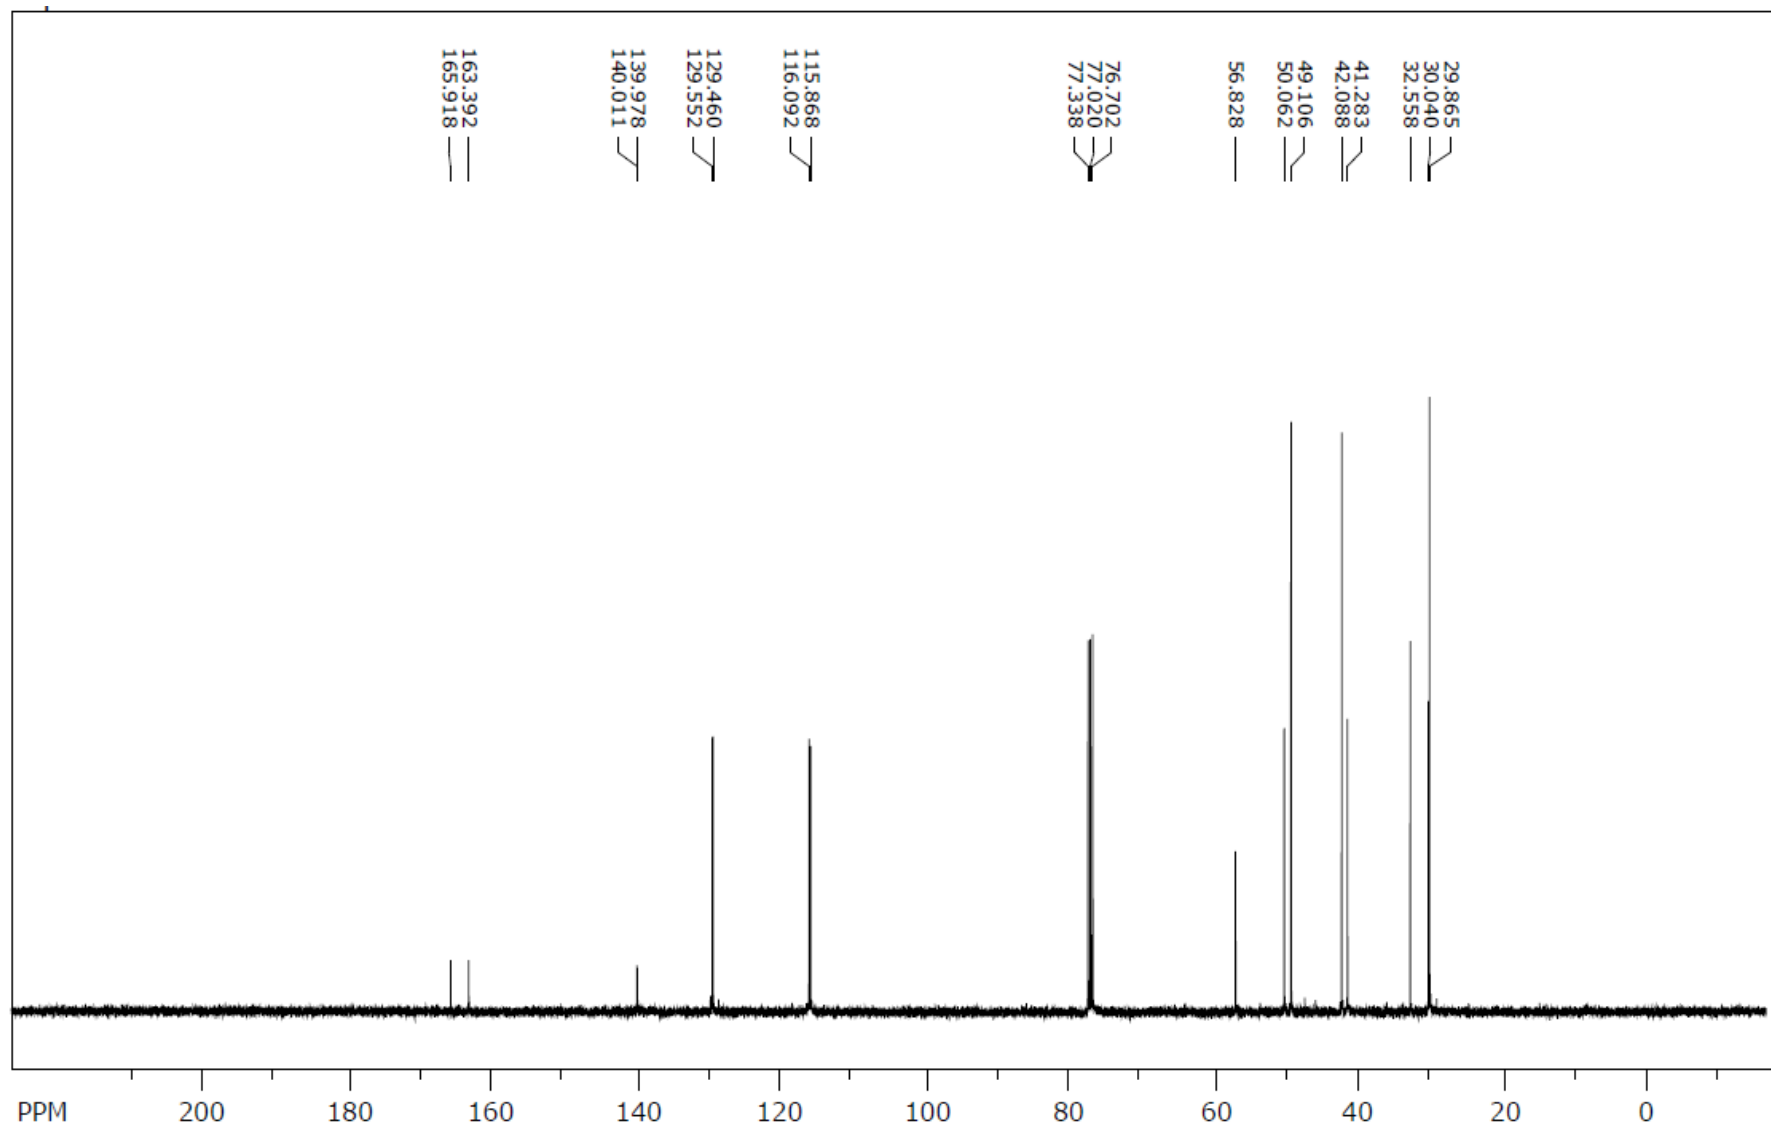

file: ...R Data\NMR Fids\RCW-66-13C.fid\fid\_block# 1\_expt: "s2pul"  
 transmitter freq.: 100.508439 MHz  
 time domain size: 63750 points  
 width: 24509.80 Hz = 243.8582 ppm = 0.384468 Hz/pt  
 number of scans: 750

freq. of 0 ppm: 100.497882 MHz  
 processed size: 65536 complex points  
 LB: 0.500 GF: 0.0000  
 Hz/cm: 980.392 ppm/cm: 9.75433

**Figure S38.**  $^{13}\text{C}$  NMR of Product 19.

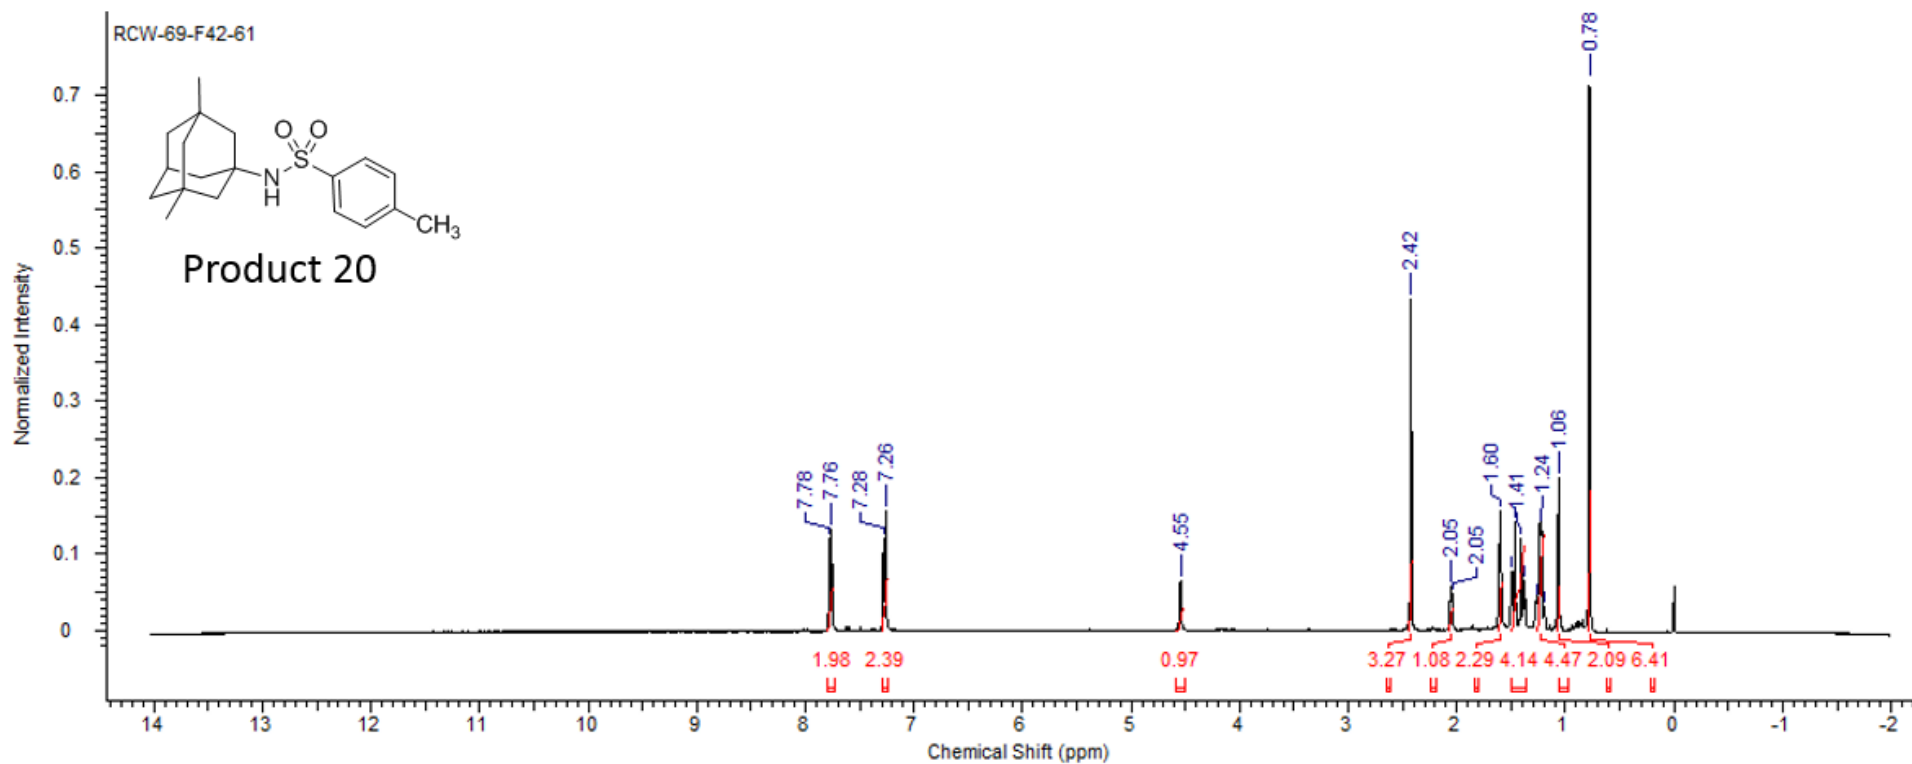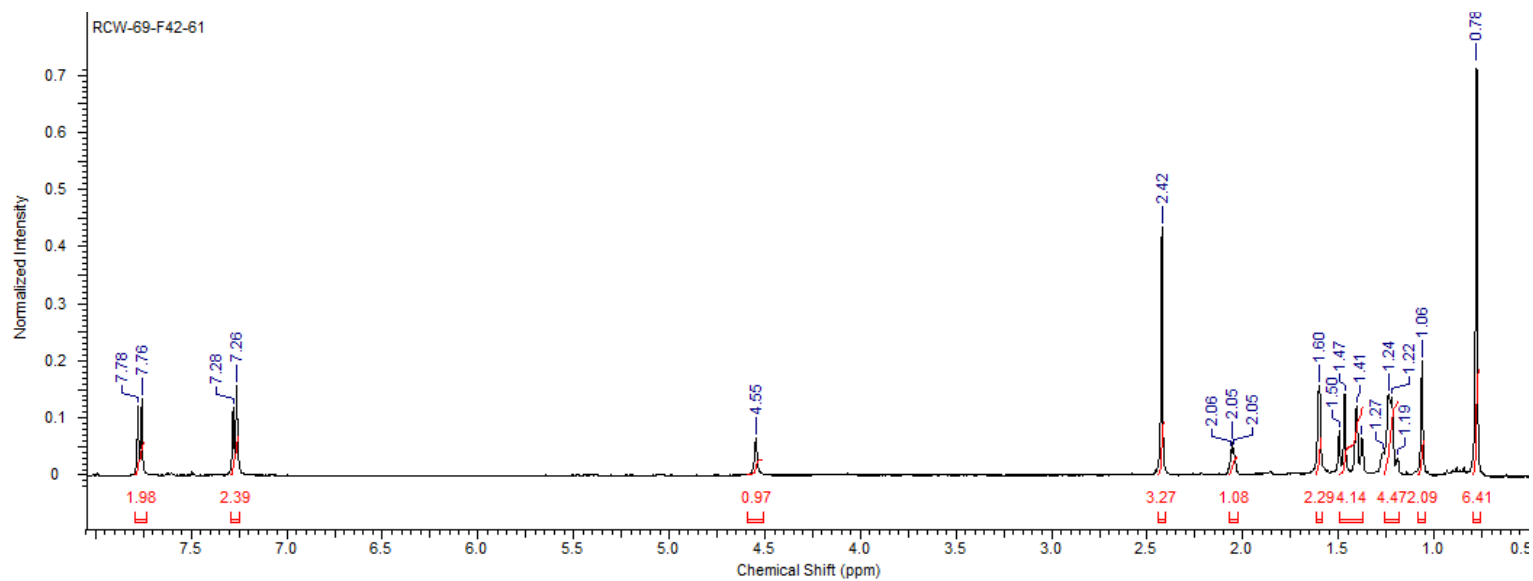

Figure S39.  $^1\text{H}$  NMR of Product 20.



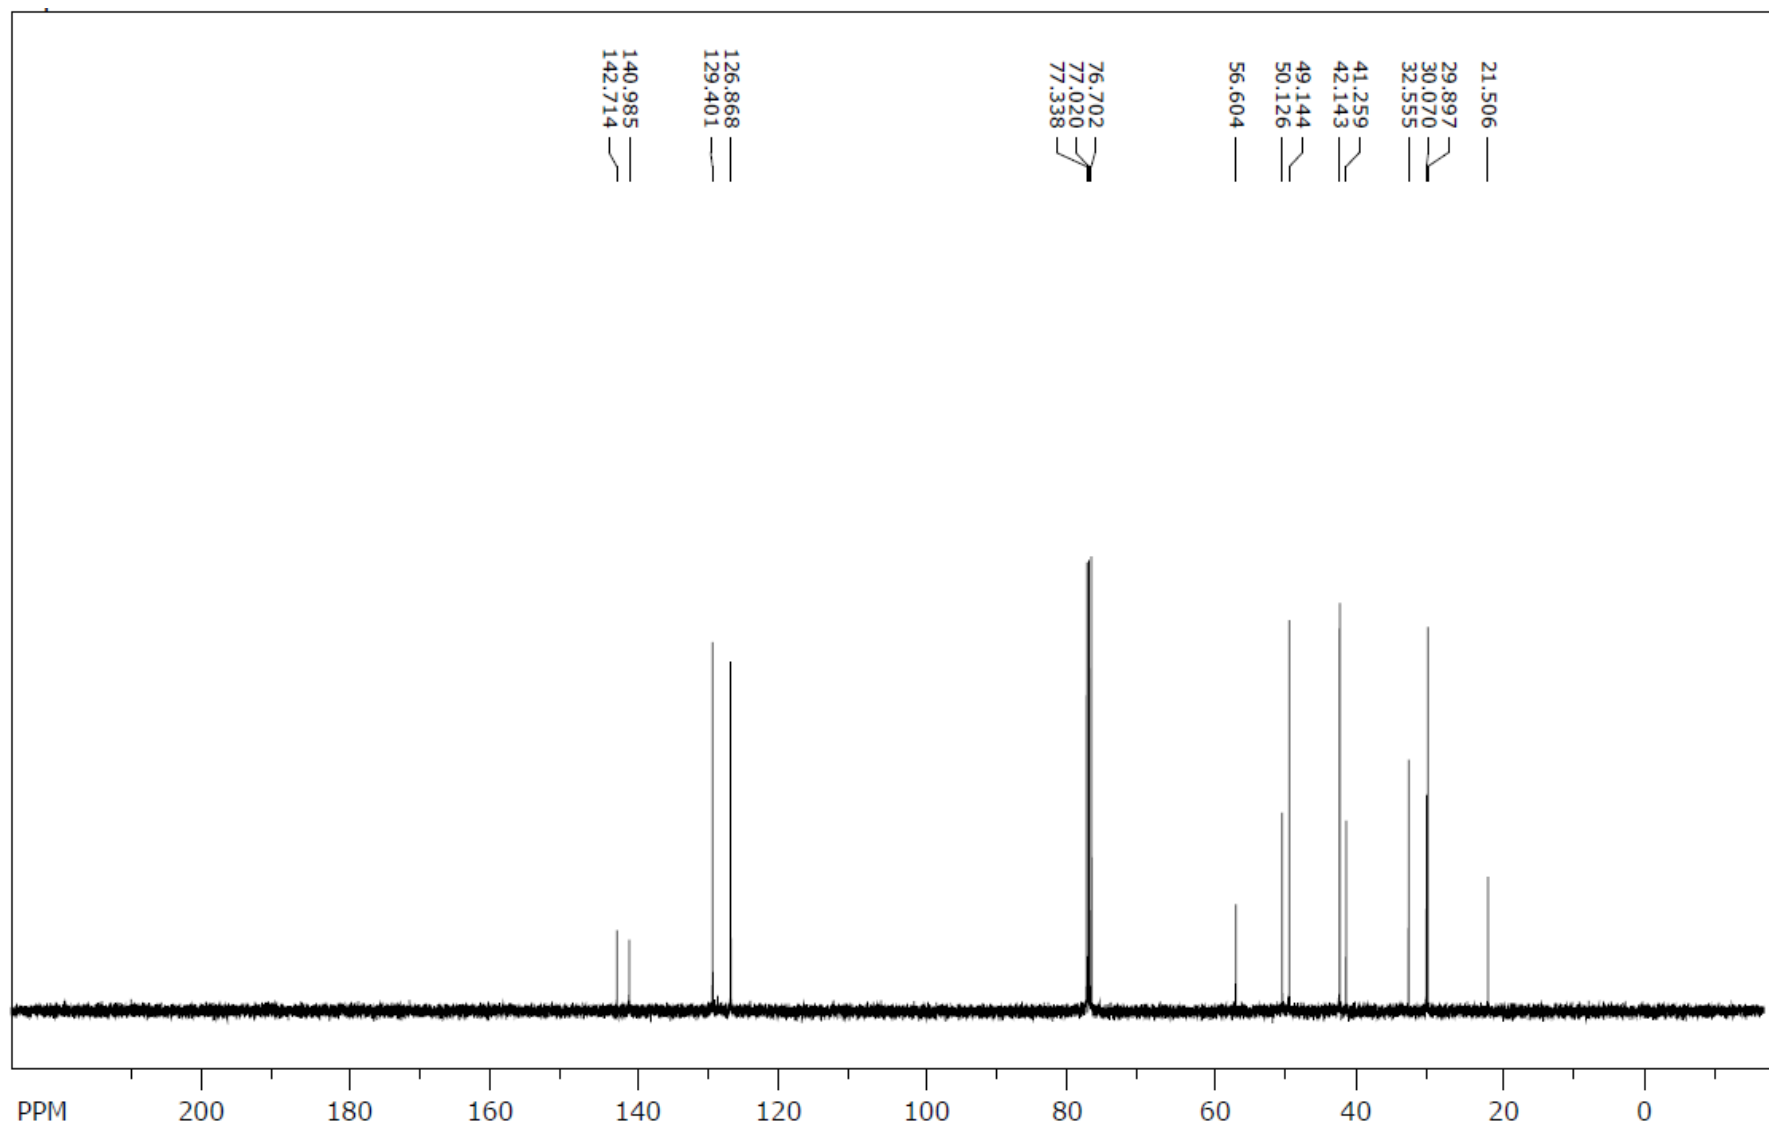

file: ...R Data\NMR Fids\RCW-69-13C.fid\fid block# 1 expt: "s2pul"  
 transmitter freq.: 100.508439 MHz  
 time domain size: 63750 points  
 width: 24509.80 Hz = 243.8582 ppm = 0.384468 Hz/pt  
 number of scans: 496

freq. of 0 ppm: 100.497882 MHz  
 processed size: 65536 complex points  
 LB: 0.500 GF: 0.0000  
 Hz/cm: 980.392 ppm/cm: 9.75433

Figure S40. <sup>13</sup>C NMR of Product 20.

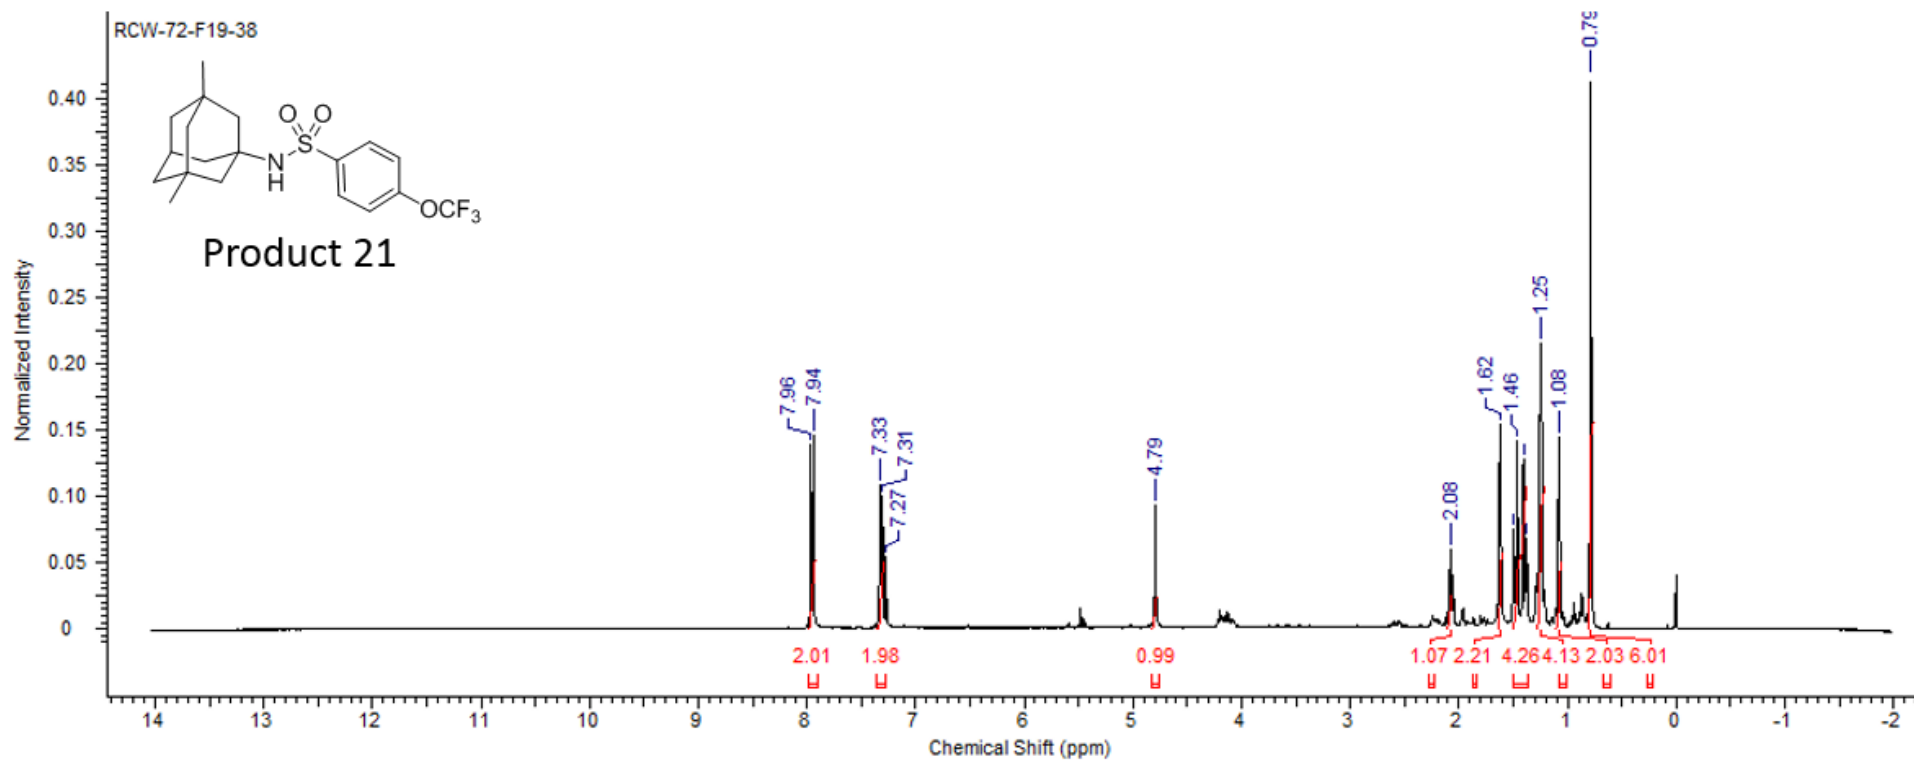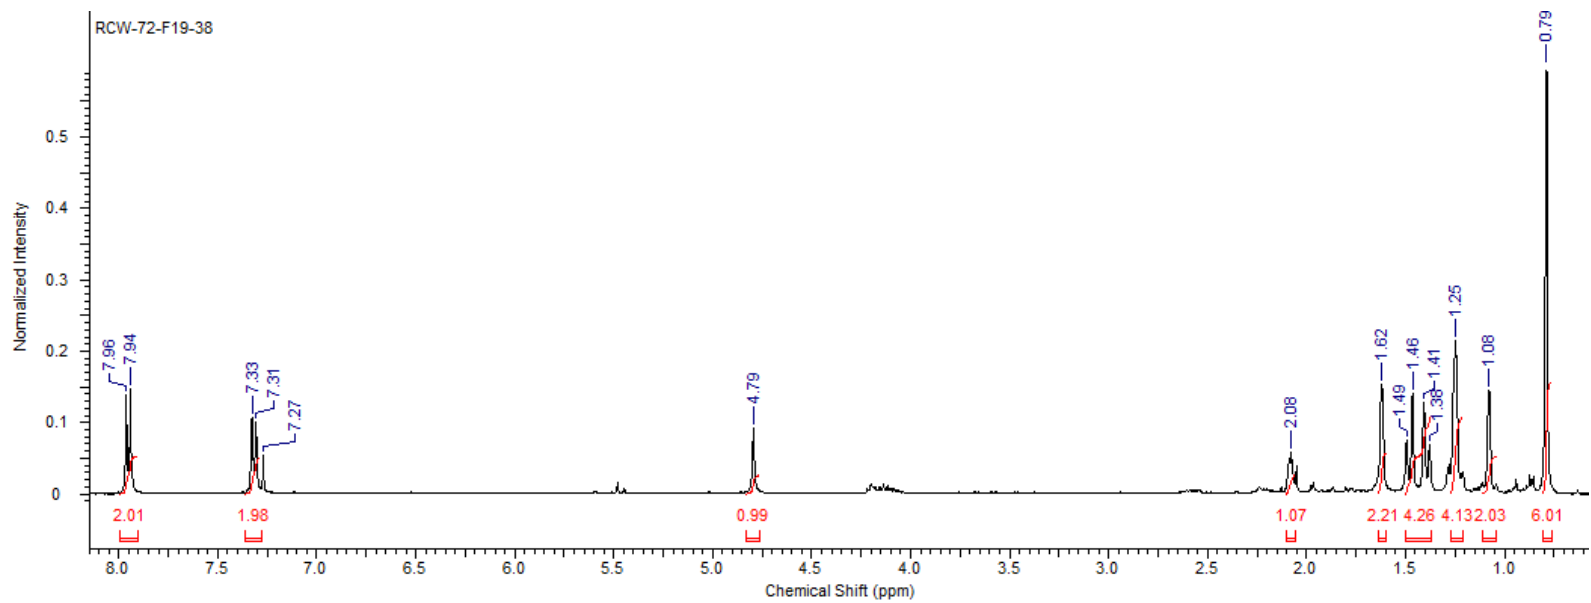

Figure S41.  $^1\text{H}$  NMR of Product 21.

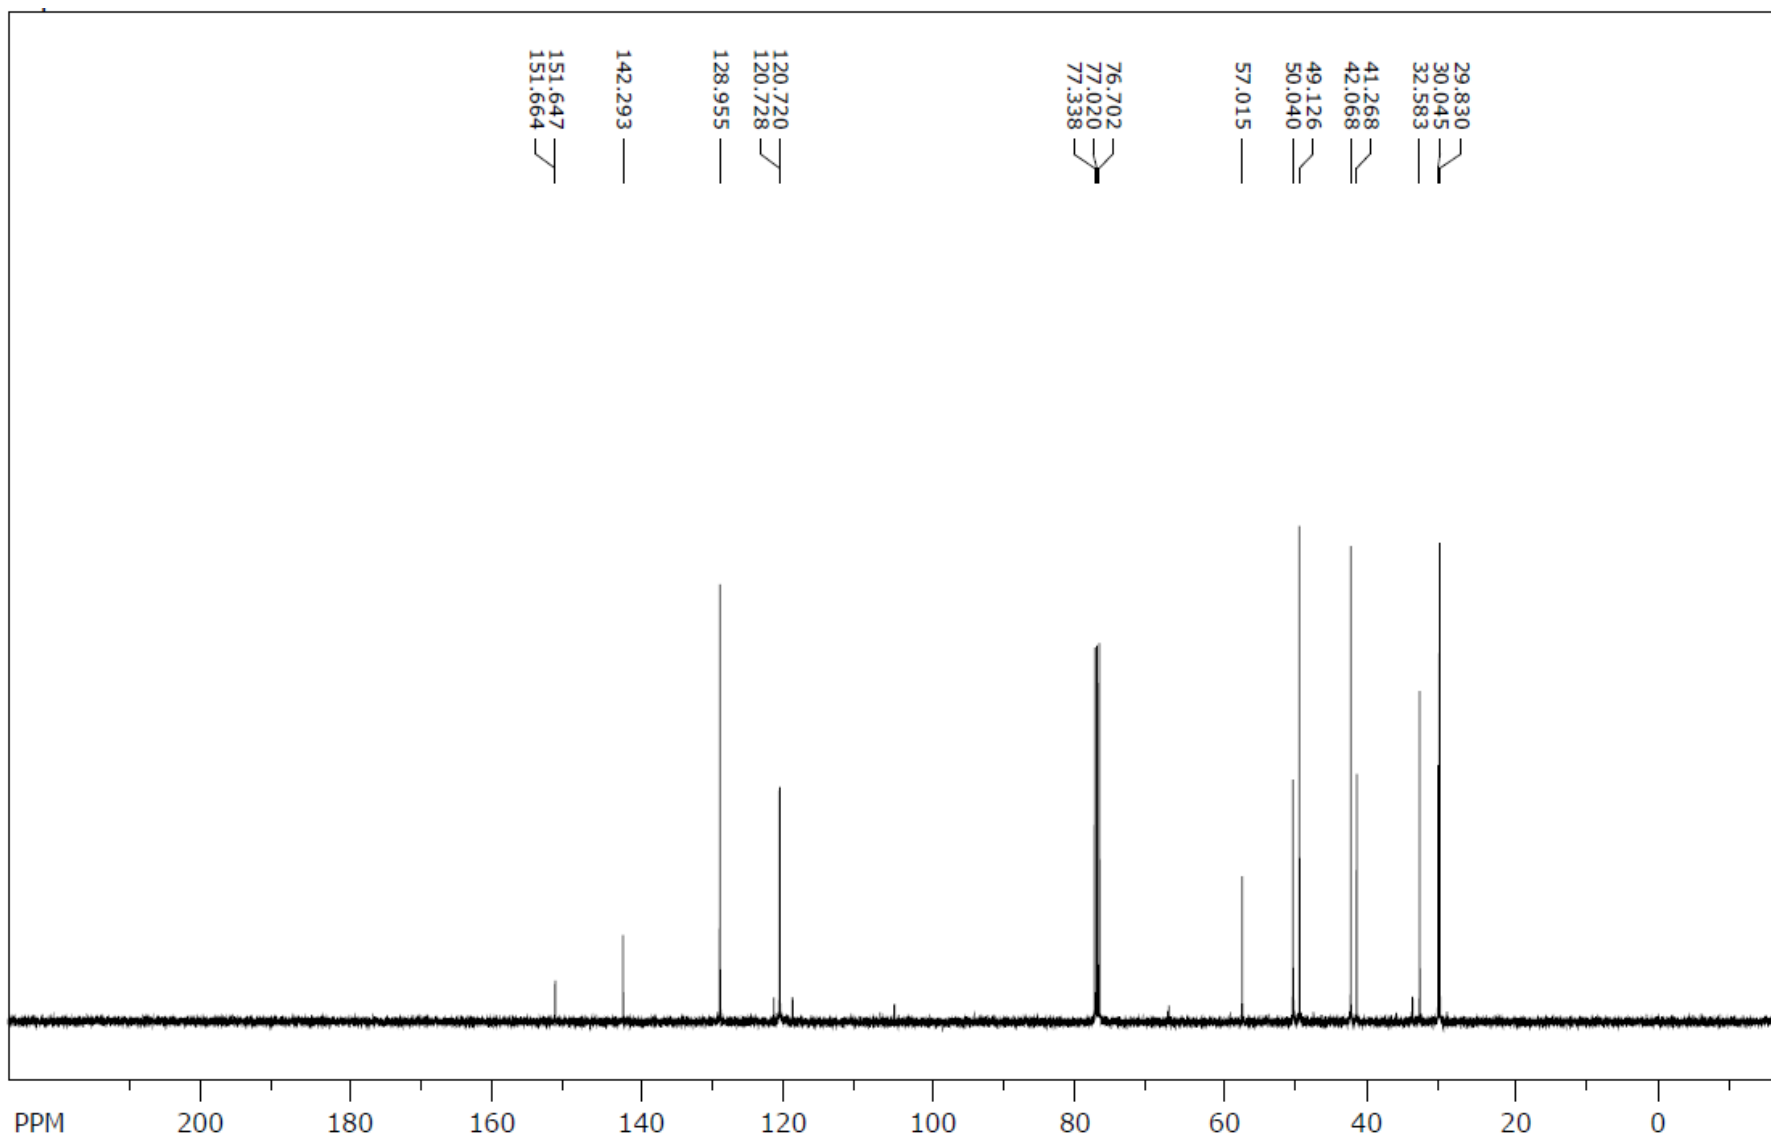

file: ...R Data\NMR Fids\RCW-72-13C.fid\fid\_block# 1 expt: "s2pul"  
 transmitter freq.: 100.508439 MHz  
 time domain size: 63750 points  
 width: 24509.80 Hz = 243.8582 ppm = 0.384468 Hz/pt  
 number of scans: 750

freq. of 0 ppm: 100.497881 MHz  
 processed size: 65536 complex points  
 LB: 0.500 GF: 0.0000  
 Hz/cm: 980.392 ppm/cm: 9.75433

**Figure S42.**  $^{13}\text{C}$  NMR of Product **21**.

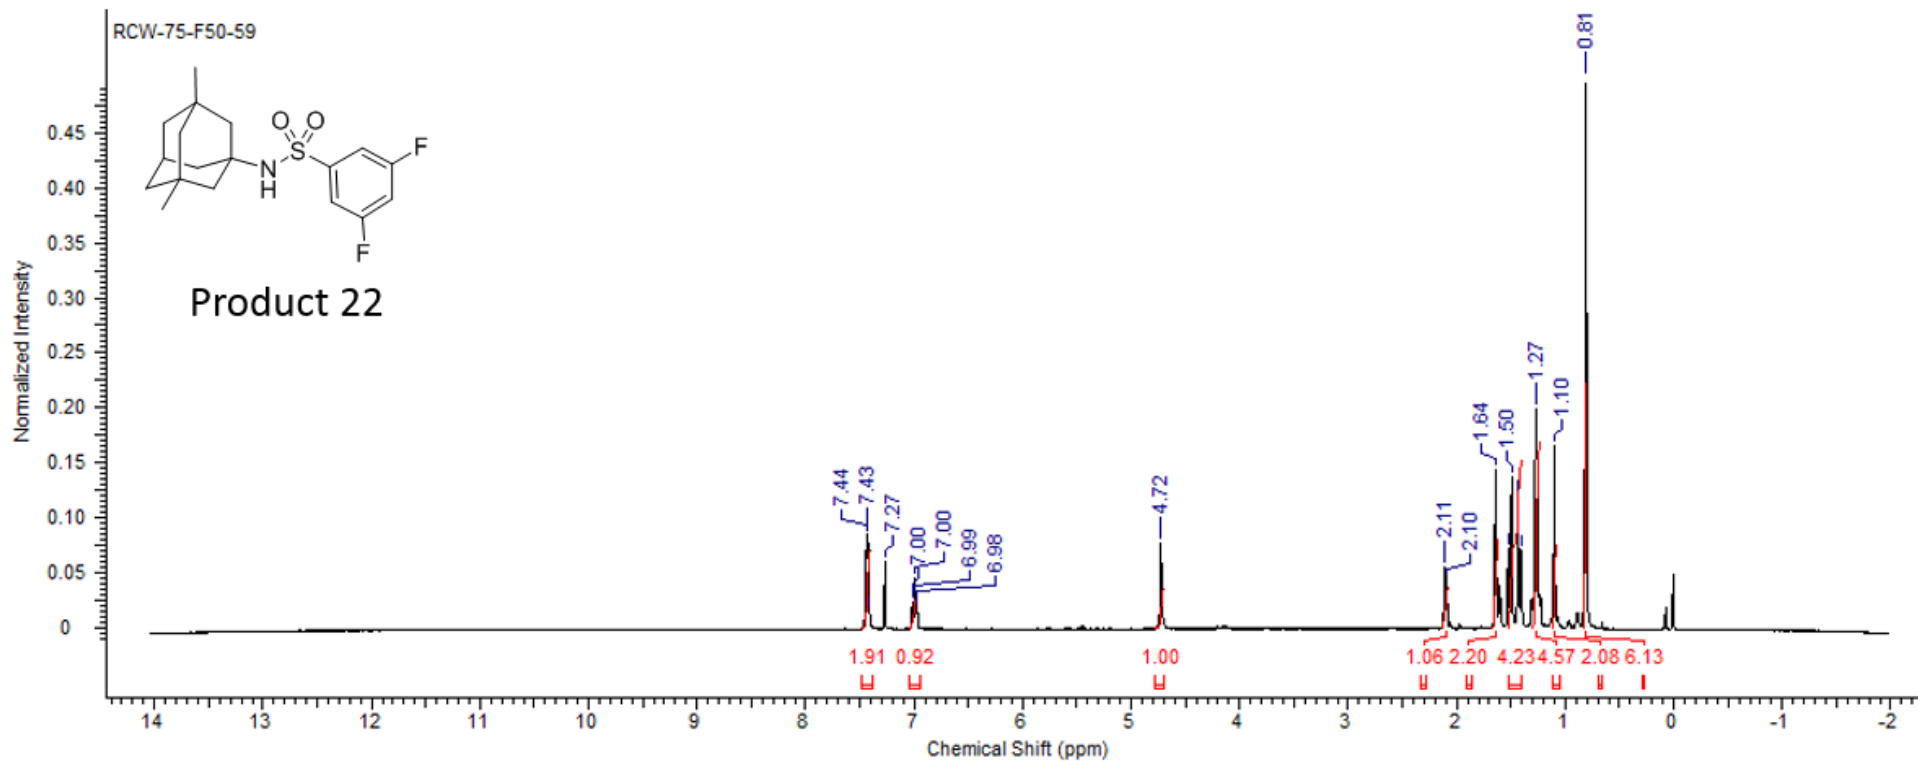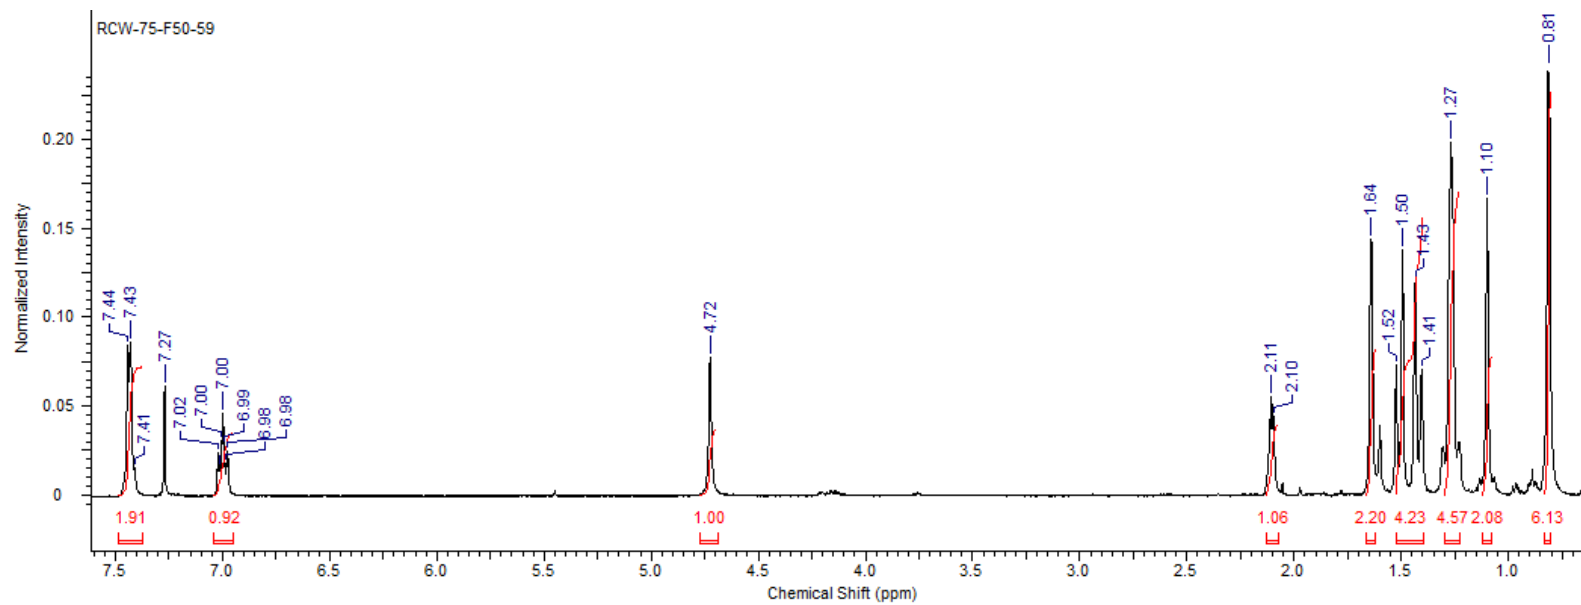

Figure S43.  $^1\text{H}$  NMR of Product 22.

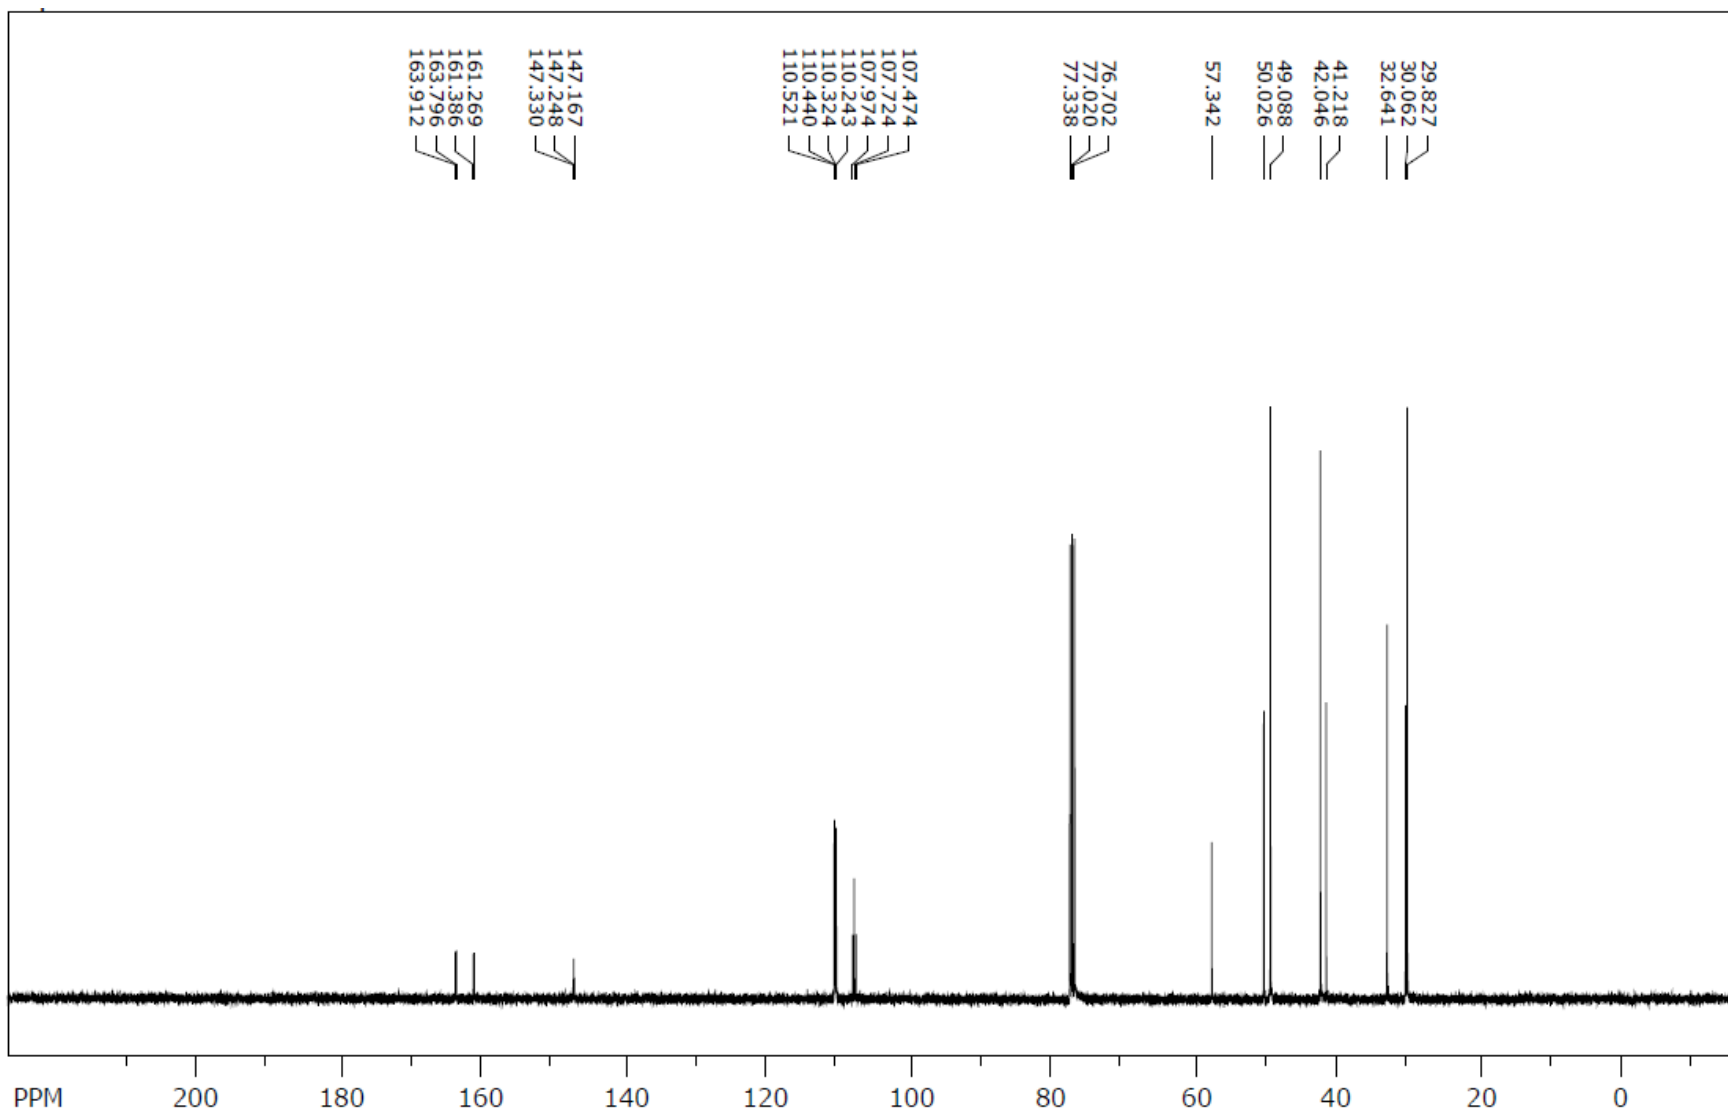

file: ...R Data\NMR Fids\RCW-75-13C.fid\fid\_block# 1\_expt: "s2pul"  
 transmitter freq.: 100.508439 MHz  
 time domain size: 63750 points  
 width: 24509.80 Hz = 243.8582 ppm = 0.384468 Hz/pt  
 number of scans: 750

freq. of 0 ppm: 100.497881 MHz  
 processed size: 65536 complex points  
 LB: 0.500 GF: 0.0000  
 Hz/cm: 980.392 ppm/cm: 9.75433

Figure S44. <sup>13</sup>C NMR of Product 22.

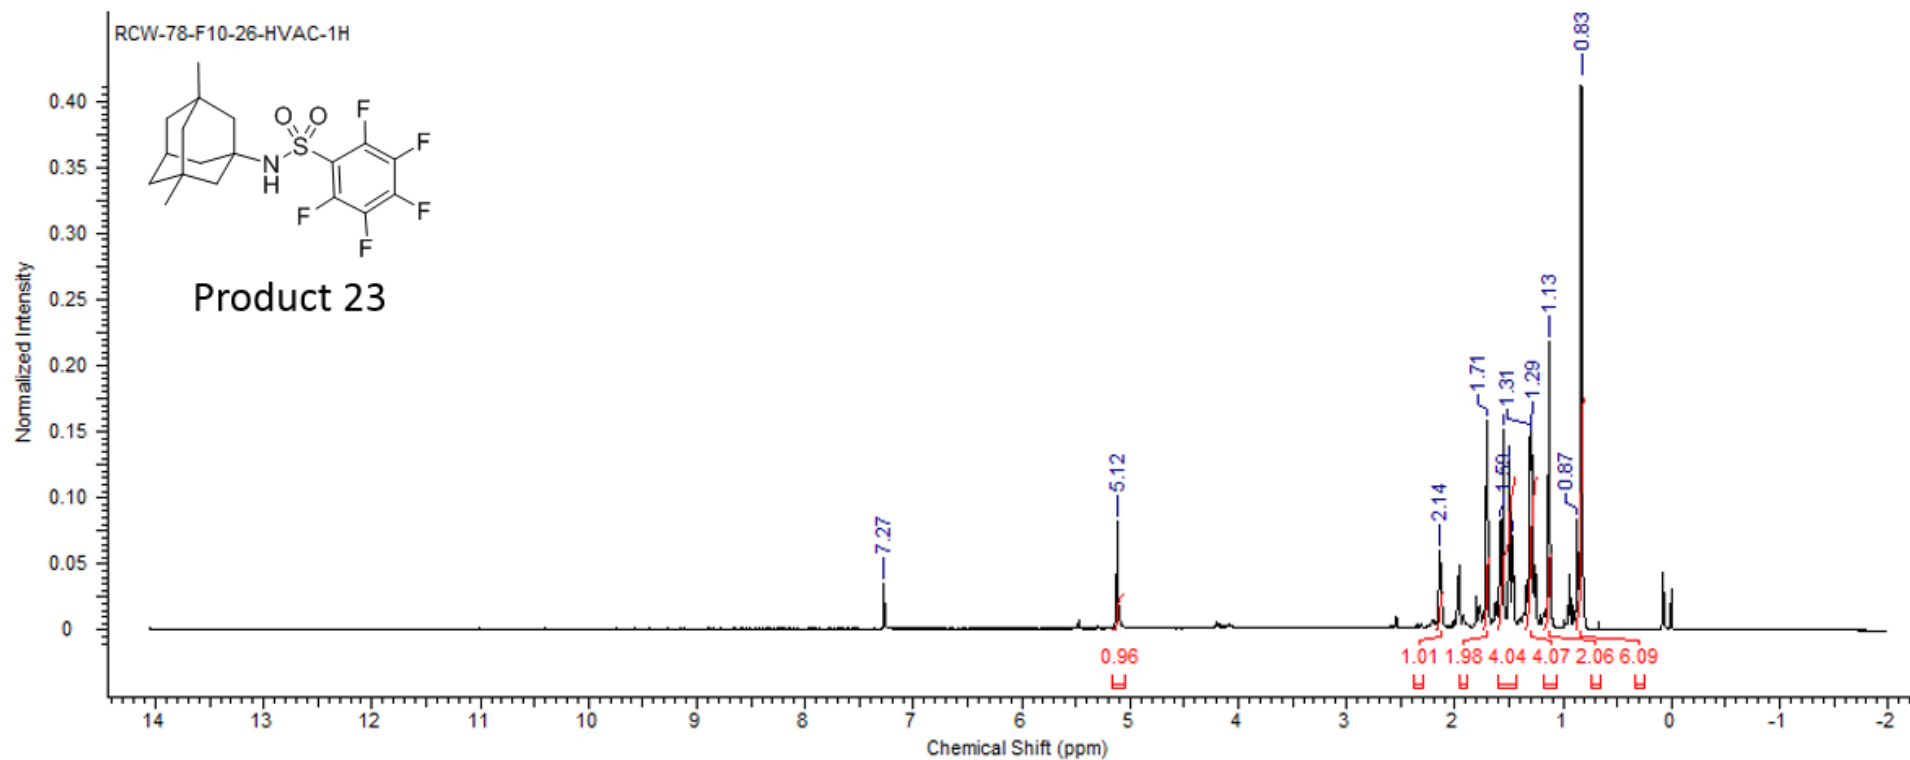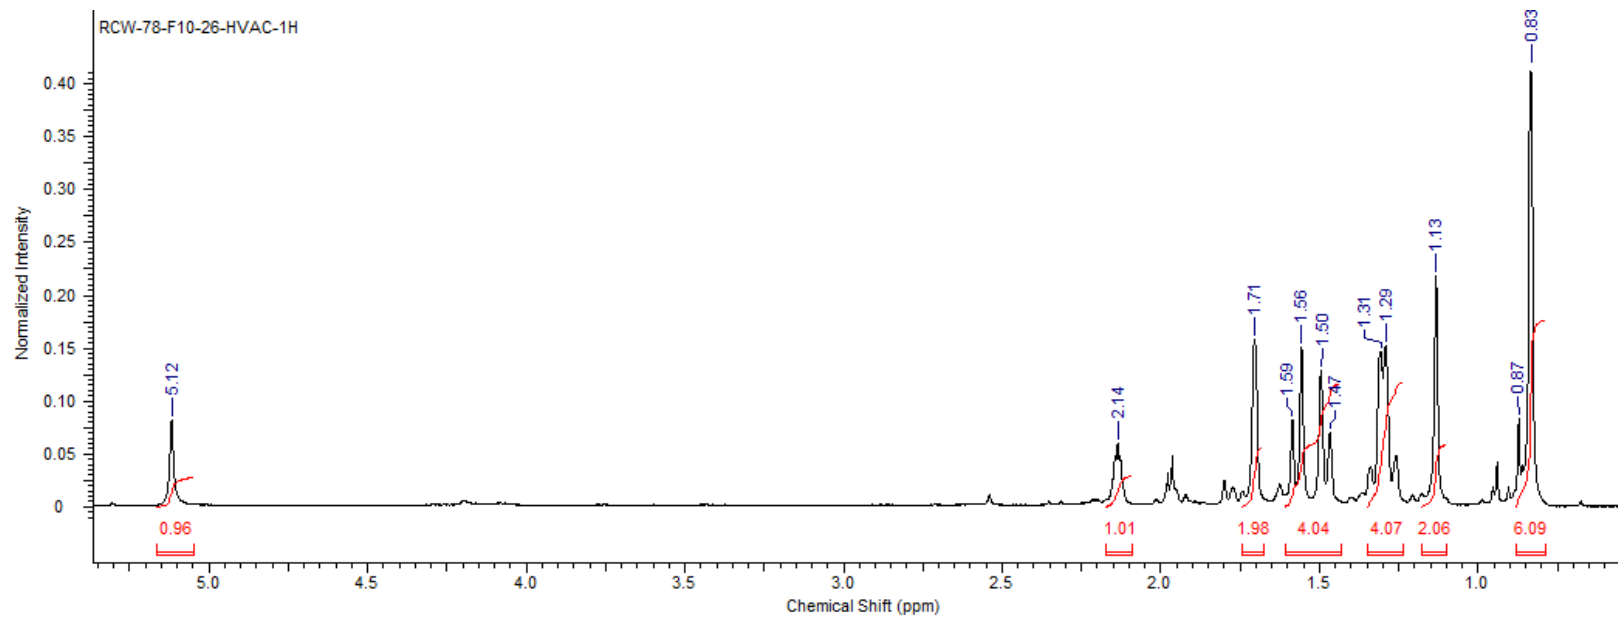

Figure S45.  $^1\text{H}$  NMR of Product 23.

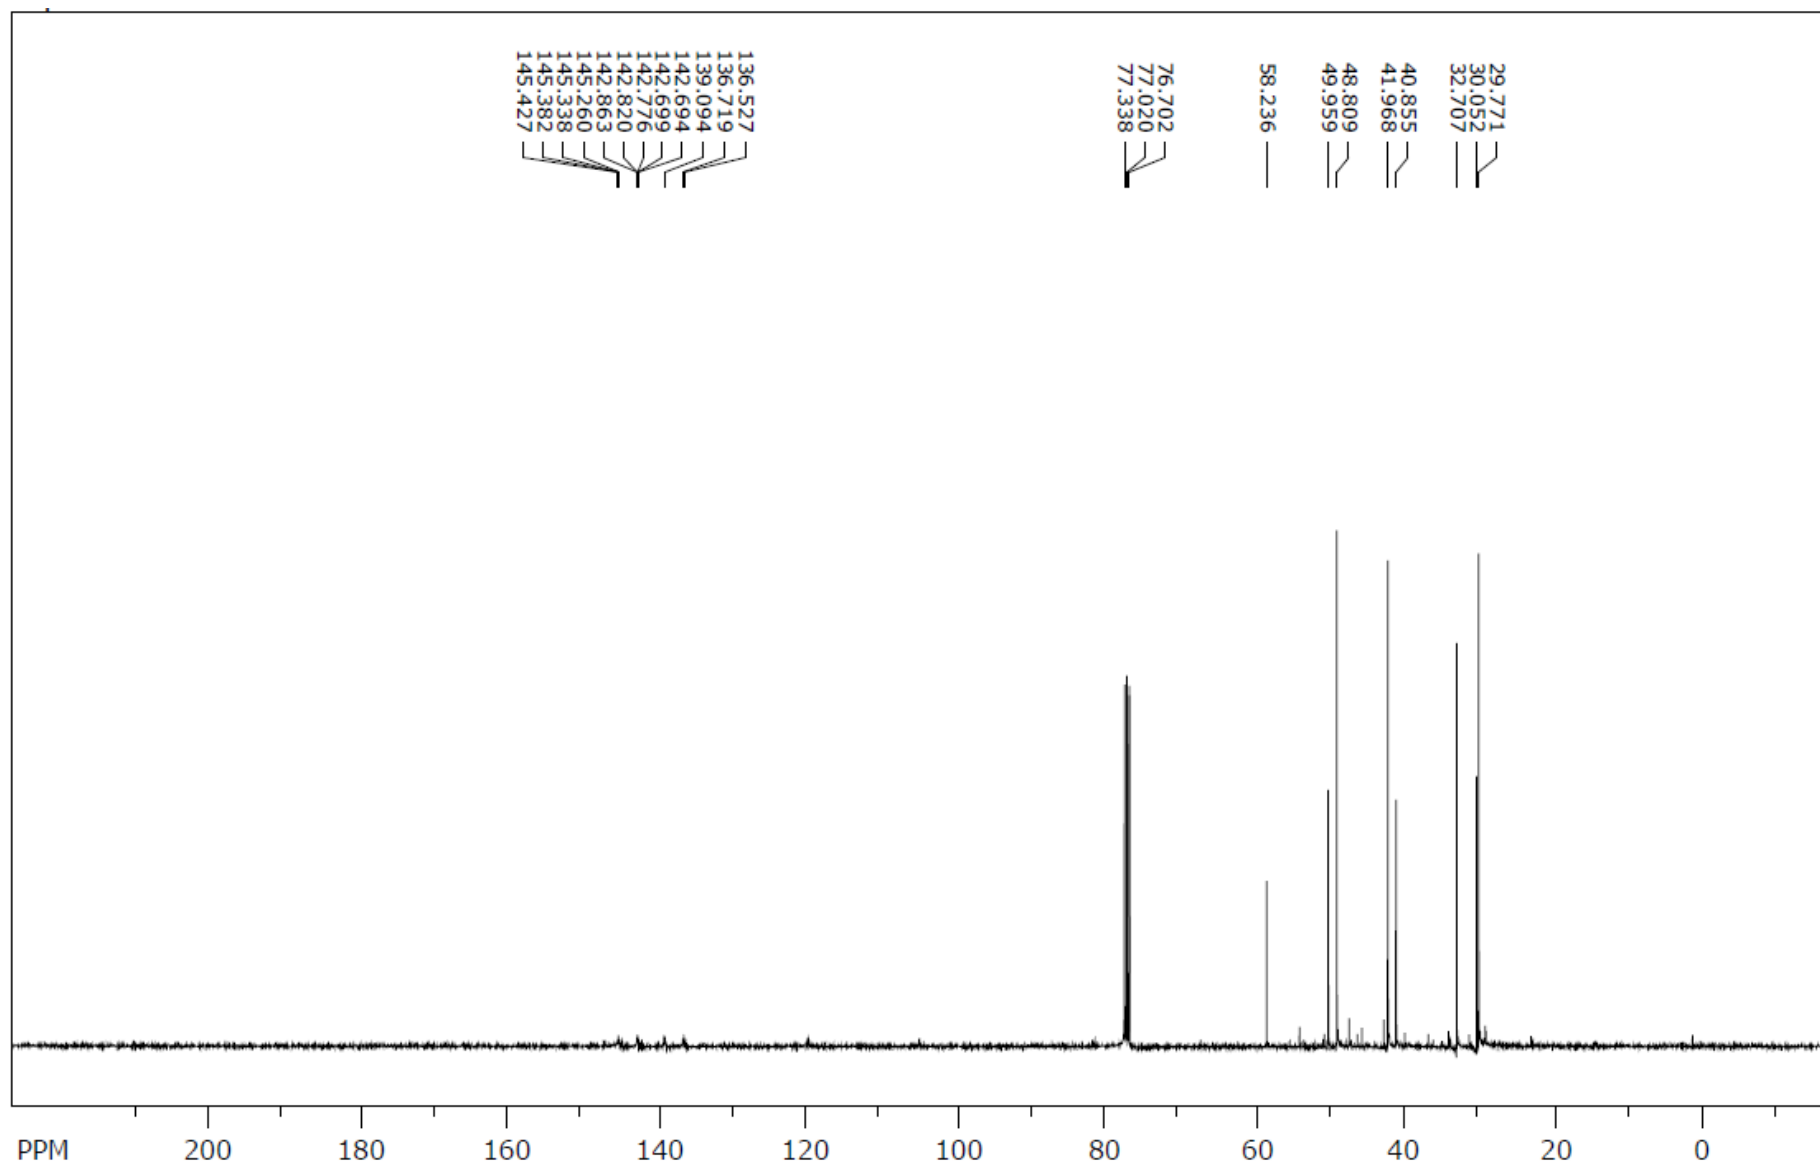

file: ...Data\NMR Fids\RCW-78-13C-B.fid\fid\_block# 1 expt: "s2pul"  
 transmitter freq.: 100.508439 MHz  
 time domain size: 63750 points  
 width: 24509.80 Hz = 243.8582 ppm = 0.384468 Hz/pt  
 number of scans: 11000

freq. of 0 ppm: 100.497882 MHz  
 processed size: 65536 complex points  
 LB: 0.500 GF: 0.0000  
 Hz/cm: 980.392 ppm/cm: 9.75433

**Figure S46.**  $^{13}\text{C}$  NMR of Product 23.

## References:

1. Rogers, D. A.; Brown, R. G.; Brandeburg, Z. C.; Ko, E. Y.; Hopkins, M. D.; LeBlanc, G.; Lamar, A. A., Organic Dye-Catalyzed, Visible-Light Photoredox Bromination of Arenes and Heteroarenes Using N-Bromosuccinimide. *ACS Omega* **2018**, *3* (10), 12868-12877.
2. Rogers, D. A.; Bensalah, A. T.; Espinosa, A. T.; Hoerr, J. L.; Refai, F. H.; Pitzel, A. K.; Alvarado, J. J.; Lamar, A. A., Amplification of Trichloroisocyanuric Acid (TCCA) Reactivity for Chlorination of Arenes and Heteroarenes via Catalytic Organic Dye Activation. *Organic Letters* **2019**, *21* (11), 4229-4233.
3. Rogers, D. A.; Gallegos, J. M.; Hopkins, M. D.; Lignieres, A. A.; Pitzel, A. K.; Lamar, A. A., Visible-light photocatalytic activation of N-chlorosuccinimide by organic dyes for the chlorination of arenes and heteroarenes. *Tetrahedron* **2019**, *75* (36), 130498.
4. Rogers, D. A.; Hopkins, M. D.; Rajagopal, N.; Varshney, D.; Howard, H. A.; LeBlanc, G.; Lamar, A. A., U.S. Food and Drug Administration-Certified Food Dyes as Organocatalysts in the Visible Light-Promoted Chlorination of Aromatics and Heteroaromatics. *ACS Omega* **2020**, *5* (13), 7693-7704.
5. Bedford, R.; LePage, D.; Hoffmann, R.; Kennedy, S.; Gutschenritter, T.; Bull, L.; Sujijantarant, N.; DiCesare, J. C.; Sheaff, R. J., Luciferase inhibition by a novel naphthoquinone. *J. Photochem. Photobiol. B* **2012**, *107*, 55-64.
6. Hopkins, M. D.; Ozmer, G. L.; Witt, R. C.; Brandeburg, Z. C.; Rogers, D. A.; Keating, C. E.; Petcoff, P. L.; Sheaff, R. J.; Lamar, A. A., PhI(OAc)<sub>2</sub> and iodine-mediated synthesis of N-alkyl sulfonamides derived from polycyclic aromatic hydrocarbon scaffolds and determination of their antibacterial and cytotoxic activities. *Organic & Biomolecular Chemistry* **2021**, *19* (5), 1133-1144.
